# Supplementary material for: Distribution patterns of dinoflagellate communities along the Songhua River
Source: PeerJ. 2019 Apr 9;7:e6733. doi: 10.7717/peerj.6733 (PMC6461062; doi:10.7717/peerj.6733)
Supplement: Supplemental Information 1 [file peerj-07-6733-s004.xlsx]

## Sheet: Table S1
Table S1 Environmental factors of sampling locations along Songhua River
Sample code	Chl_a	EC	TDS	pH	ORP	DO	T	COD	TN	NO3-N	NH4-N	TP	SRP	Ca	K	Mg	Na	Cr	Fe	Mn	Cu	Zn	As	Pb
	(μg/L)	（μS/cm）	(mg/L)		(mV)	(mg/L)	(℃)	mg/L	mg/L	mg/L	mg/L	mg/L	mg/L	mg/L	mg/L	mg/L	mg/L	ug/L	ug/L	ug/L	ug/L	ug/L	ug/L	ug/L
S01	16.31	152.4	94.79	8.21	251	9.6	28.4	20	4.2	11.609	0.51	0.765	0.127	7.105	1.27	3.791	4.881	12.66	92.3	4.194	5.161	20.32	1.773	2.052
S02	14.71	167.9	104.9	7.61	260	8.49	28.4	20	4.91	9.067	1.5	0.686	0.091	8.947	1.326	4.868	5.589	10.01	65.08	3.534	4.698	33.79	2.498	2.105
S03	11.35	277.6	175.4	7.28	273	10.08	30.5	14	1.519	0.424	0.06	0.646	0.197	14.509	1.354	9.664	8.308	13.93	54.8	6.936	5.909	19.79	3.684	2.05
S04	17.03	230.8	146.8	7.54	236	8.91	28	26	6.329	6.102	0.19	0.965	0.127	11.053	1.501	5.999	6.762	12.93	71.4	8.758	6.011	13.55	2.437	2.028
S05	12.23	67.26	41.97	6.82	267	5.49	29	52	1.44	5.085	0.58	0.367	0.303	3.984	0.69	2.468	1.805	14.58	294.8	72.22	5.982	16.85	3.742	2.111
S06	10.79	122	75.41	7.48	234	12.53	31.7	6	0.02	0.509	0.08	0.168	0.021	5.594	0.835	2.708	5.267	24.92	92.69	31.25	7.138	19.09	0.8356	2.084
S07	4.31	89.65	55.46	7.63	270	10.44	32.4	115	1.046	1.526	0.03	0.327	0.091	5.662	0.653	2.778	2.572	8.146	94.88	152.4	3.441	8.857	1.382	2.052
S08	9.43	302	191.4	7.56	271	7.39	34.3	31	2.544	1.017	0.01	0.606	0.021	16.194	2.812	7.995	14.546	14.16	108.7	13.37	5.32	8.703	4.652	2.063
S09	24.47	609.5	402.9	7.58	266	3.36	28.8	21	4.042	6.864	1.24	0.566	0.127	11.473	3.025	11.286	36.438	26.72	142.2	5.137	10.1	21.53	8.541	2.38
S10	18.07	98.44	61.44	7.51	263	11.55	27.4	56	6.96	2.882	0.24	0.965	0.091	4.954	0.771	2.125	2.455	17.74	229	23.2	6.33	12.21	1.322	2.171
S11	19.11	240.6	152.1	9.05	193	12.48	30	69	4.279	2.034	0.16	0.646	0.056	10.956	1.952	5.988	9.684	13.7	198.4	13.38	7.996	20.6	3.529	2.328
S12	17.43	440.8	287	8.74	254	12.68	28.6	35	6.487	3.729	0.04	0.526	0.056	15.796	2.399	8.424	26.494	9.088	47.21	2.525	4.546	5.248	2.526	2.021
S13	27.65	248.4	157.5	8.43	250	14.22	27.8	28	2.307	2.882	0.16	0.247	0.162	10.895	1.684	6.115	8.96	15.13	81.98	6.629	6.138	11.96	1.27	2.106
S14	23.45	401.2	260.7	7.6	270	5.71	27.3	27	19.972	6.695	2.74	1.403	0.48	13.892	2.246	8.733	20.598	29.9	377	7.198	15.77	15.81	3.581	2.154
S15	23.85	219.2	138.7	8.8	233	10.81	28.9	27	10.903	12.965	0.47	0.965	0.091	6.924	1.19	3.389	4.585	3.571	54.51	1.039	2.985	4.48	1.274	2.029
S16	22.55	177.8	112.2	8.89	255	6.3	25.4	43	3.806	0.509	0.04	0.526	0.091	9.146	1.627	4.916	5.95	12.46	136.1	13.25	5.07	9	7.178	2.129
S17	5.91	223.8	142.5	9.19	258	9.04	26.3	23	4.042	0.34	0.2	0.486	0.056	10.619	1.464	7.343	8.491	10.17	44.65	1.872	4.438	7.822	2.724	2.024
S18	3.13	172.3	109.3	7.32	295	9.7	19.6	11	7.276	7.542	0.01	0.128	0.162	9.57	1.434	5.238	6.088	11.4	73.24	1.714	5.056	11.72	1.033	2.072
S19	3.67	144.1	90.72	7	60	6.12	13.9	24	5.146	1.441	0.01	0.73	0.002	10.071	1.144	3.178	4.122	25.13	161	263	7.38	17.67	2.049	2.118
S20	24.34	222.8	147.3	8.64	205	14.92	20	32	18.71	15.422	0.001	0.789	0.084	14.68	1.649	6.722	6.934	15.24	81.52	31.36	5.132	11.8	0.9286	2.059
S21	6.89	186.6	119.8	7.95	260	10.99	17.1	17	5.383	4.407	0.12	0.311	0.002	13.593	1.283	6.654	3.495	10.06	93.75	25.13	5.978	9.491	0.8095	2.055
S22	1.99	268.7	175.8	7.67	300	11.72	14	15	6.487	5.763	0.29	0.969	0.002	14.918	2.204	14.588	6.036	16.46	82.55	56.6	6.263	12.58	0.5569	2.055
S23	17.35	434.6	292.9	7.32	297	13.49	16.9	29	4.594	5.085	0.01	0.251	0.002	26.259	2.037	19.374	6.984	12.9	64.51	6.948	5.903	14.44	0.6911	2.093
Note. Chl_a: Chlorophyll a, EC: Electrical conductivity, TDS: Total dissolved solids, ORP: Oxidiation reduction potential, DO: Dissoved oxygen, T: Temperature, COD:Chemical oxygen demand, TN: Total nitrogen, TP: Total phosphorus, SRP: Solubility reactive phosphorus

## Sheet: Table S2
Table S2 Operational Taxonomic Unit (OTU) table of dinoflagellates with annotations (Order, Family and Genus levels) for the 23 samples. OTUs are shown in relative abundance.
OTUs	Sequence	Similarity	Order	Family	Genus	S01	S02	S03	S04	S05	S06	S07	S08	S09	S10	S11	S12	S13	S14	S15	S16	S17	S18	S19	S20	S21	S22	S23
OTU_6	AGCCGCGGTAATTCCAGCTCCAATAGCGTATATTAAAGTTGTTGCGGTTAAAAAGCTCGTAGTTTGACCTCTGCTCAGGTAGACTGGTCCGCCCTCTGGGTGAGCATCTGGCTTGGCCTGGGCATTTTCTTGGTGATCGCAGCTGCCCTTGACTGTGTGGTGCGGAATTCAGGACATTTACTTTGAGGAAATCAGAGTGTTTCAAGCAGGCATCTGCCTTGAATA	100	Gonyaulacales	Ceratiaceae	Ceratium	0	2.6	105.6	2	146.4	116.2	1.6	116.7	42.3	78.1	97.1	148.6	73.8	77.2	73.2	57.9	41.1	3.6	238.7	80.3	55.3	4072.3	187
OTU_7	AGCCGCGGTAATTCCAGCTCCAATAGCGTATATTAAAGTTGTTGCGGTTAAAAAGCTCGTAGTTGGATTTCTGTCGAAGGAGACCGGTCCGCCCTCTGGGTGAGTATCTGGATCTCTTTGGACATCTTCTTGGGGAACGTATCTGCACTTCATTGTGCGGTGCGGTACTCAAGACTTTTACTTTGAGGAAATTAGAGTGTTTCAAGCAGGCACACGCCTTGAATA	100	Peridiniales	Kryptoperidiniaceae	Unruhdinium	0.7	0	5.2	6.1	4.9	2.8	0.5	1.3	0	749.1	22.1	43.5	25.7	1.9	2.9	3.9	0.9	10.9	52.4	6.5	194.2	15.7	3.8
OTU_115	AGCCGCGGTAATTCCAGCTCCAATAGCGTATATTAAAGTTGTTGCGGTTAAAAAGCTCGTAGTTGGATTTCTGCCGAGGACGACCGGTCCGCCCTCTGGGTGTGCATCTGGCTCGGCCTGGGCATCTTCTTGGAGAACGTATCTGCACTTCATTGTGTGGTGCGGTATCCAGGACCTTTACTTTGAGGAAATTAGAGTGTTTCAAGCAGGCACACGCCTTGAATA	99.1	Peridiniales	Thoracosphaeraceae	Thoracosphaeraceae_X	5.3	0	3.1	4.1	0	0.9	2.2	1.3	3.8	3	0	1.8	0	0.5	8.3	8.8	2	3.6	318.7	35.3	3	3.6	3.8
OTU_176	AGCCGCGGTAATTCCAGCTCCAATAGCGTATATTAAAGTTGTTGCGGTTAAAAAGCTCGTAGTTGGATTTCTGCTTAGGTAGACTGGTCCGCCCTCTGGGTGAGCATCTGGCTTGGCCTGGGCATTTTCTTGGTGATCGCAGCTGCCCTTGACTGTGTGGTGTGGAACTCAGGACTTTTACTTTGAGGAAATCAGAGTGCTTCAAGCAGGTATCTGCCTTGAATA	98.7	Gonyaulacales	Ceratiaceae	Ceratium	0	0	0	0	310.6	0.5	0	0	0	0	1.5	0	0	0	0	0	0	0	0	0.9	0	0	0
OTU_146	AGCCGCGGTAATTCCAGCTCCAATAGCGTATATTAAAGTTGTTGCGGTTAAAAAGCTCGTAGTTGGATTTCTGTTCAGGACGACCGGTCCGCCCTCCGGGTGAGCATCTGGTTCGGCCTGGGCATCTTCTTGGAGAACGTCGCTGCACTTGACTGTGTGGTGCGGTATCCAGGACTTTTACTTTGAGGAAATTAGAGTGTTTCAAGCAGGCACACGCCTTGAATA	98.2	Peridiniales	Peridiniopsidaceae	Parvodinium	0	0	1	0	0	0.9	0	0	0	2.2	0	2.7	2.7	0	9.8	0	0.7	0	209.7	26	16.4	23	1.9
OTU_213	AGCCGCGGTAATTCCAGCTCCAATAGCGTATATTAAAGTTGTTGCGGTTAAAAAGCTCGTAGTTGGATTTCTGCTGAGGACGATCGGTCCGCCCTCTGGGTGAGTATCTGGCTCGGCCTTGGCATCTTCTTGGGGAACGTTGCTGCACTTGACTGCGTGGCGCGGTACCCAGGACTTTTACTTTGAGGAAATTAGAGTGTTTCAAGCAGGCGCACGCCTTGAATA	100	Gymnodiniales	Gymnodiniaceae	Nusuttodinium	0	0	0.5	0	0	0	0	0	0	0	0	0	0.5	0.9	0	0.5	0	0	2.8	0	194.2	10.9	1.9
OTU_328	AGCCGCGGTAATTCCAGCTCCAATAGCGTATATTAAAGTTGTTGCGGTTAAAAAGCTCGTAGTTGGATTTCTGCCGAGGACGACCGGTCCGCCCTCCGGGTGAGCATCTGGCTCGGCCTAGACATCTTCTTGGGGAGCGTATCTGCACTTCATTGTGTGGTGCGGTATCCAAGACTTTTACTTTGAGGAAATTAGAGTGTTTCAAGCAGGCCCACGCCTTGAATA	100	Peridiniales	Kryptoperidiniaceae	Durinskia	0.7	1.3	2.1	0	0	0.5	1.1	1.3	0	0	1.5	5.4	2.7	0	0	0	0.2	0	77.3	0.5	3	0	0
OTU_228	AGCCGCGGTAATTCCAGCTCCAATAGCGTATATTAAAGTTGTTGCGGTTAAAAAGCTCGTAGTTGGATTTCTGCTGAGGACGACCGACCGACCCAAACGGGTTTGTGTCTGGTTAGACCGAGGCATCCTCTTGGAAGACGTGTTCCACTTTACTGTGGTCACGGAGTCCAGGACTTTTACTTTGAGGAAATTAGAGTGTTTCAAACAGGCGTTCGCCGTGAATAC	100	Prorocentrales	Prorocentraceae	Prorocentrum	84.3	1.3	0	2	0	0	0	0	3.8	0	0	0	0	0	0	0	0	3.6	0	0	0	0	0
OTU_210	AGCCGCGGTAATTCCAGCTCCAATAGCGTATATTAAAGTTGTTGCGGTTAAAAAGCTCGTAGTTGGATTTCTGCCGAGGACGACCGACCGACCCAAACGGGTTTGTGTCTGGTTAGACCGAGGCATCCTCTTGGAAGACGTGTTCCACTTTACTGTGGTCACGGAGTCCAGGACTTTTACTTTGAGGAAATTAGAGTGTTTCAAACAGGCGTTCGCCGTGAATAC	99.6	Prorocentrales	Prorocentraceae	Prorocentrum	0.7	1.3	0	0	0	0	0	0	0	0	1.5	49.8	5.9	29.9	2.5	0	0	0	1.4	0	0	1.2	0
OTU_466	AGCCGCGGTAATTCCAGCTCCAATAGCGTATATTAAAGTTGTTGCGGTTAAAAAGCTCGTAGTTGGATTTCTGCTTAGGTAGACTGGTCCGCCCTCTGGGTGAGCATCTGGCTTGGCCTGGGCATTTTCTTGGTGATCGCAGCTGCCCTTGACTGTGTGGTGTGGAACTCAGGACTTTTACTTTGAGGAAATCATTGTGCTTCAAGCAGGTATCTGCCTTGAATA	97.8	Gonyaulacales	Ceratiaceae	Ceratium	0	0	0.5	0	79.7	0.5	0	1.3	0	0	0	0	0	0	0	0	0	0	0	0	0	0	0
OTU_311	AGCCGCGGTAATTCCAGCTCCAATAGCGTATATTAAAGTTGTTGCGGTTAAAAAGCTCGTAGTTGGATTTCTGTCGAGGACGACCGGTCCGCCCCCCGGGTGAGTATCTGGCTCGGCCTGGACATCTTCTTGGAGAACGTCGCTGCACTTCACTGTGTGGTGCGGTATCCAGGACTTTTACTTTGAGGAAATTAGAGTGTTTCAAGCAGGCACACGCCTTGAATA	100	Peridiniales	Peridiniopsidaceae	Parvodinium	0	0	16.7	6.1	4.9	1.4	1.1	0	0	11.2	0	0	0.5	0	0.7	0	1.6	0	26.2	0.5	0	2.4	3.8
OTU_375	AGCCGCGGTAATTCCAGCTCCAATAGCGTATATTAAAGTTGTTGCGGTTAAAACGCTCGTAGTTGGACCTCTGCCGAGAACGACTGGTCCGCCCTCTGGGTGAGTATCTGGCTCGGGCTGGGCATCTTCTTGGAAAGCGTAGCTGCGCTTGACTGTGTGGCGCGGTGTCCAAGACTTTTACTTTGAGGAAATTAGAGTGCTTCAAGCAGGCGCACGCCCTGAATA	97.8	Peridiniales	Peridiniaceae	Peridinium	0	0	1.6	0	4.9	0.9	0	4	0	3	0	3.6	2.1	2.4	1.8	0.5	0	0	2.8	2.8	4.5	25.4	3.8
OTU_569	AGCCGCGGTAATTCCCATCCAATAGCGTATATTAAAGTTGTTGCGGCTAAAAAGCTCGTAGTTGGATTTCTGCTTAGGTAGACTGGTCCGCCCTCTGGGTGAGCATCTGGCTTGGCCTGGGCATTTTCTTGGTGATCGCAGCTGCCCTTGACTGTGTGGTGTGGAACTCAGGCCTTTTACTTTGAGGAAATCAGAGTGCTTCAAGCAGGTATCTGCCTTGAATAA	96.9	Gonyaulacales	Ceratiaceae	Ceratium	0	0	0	0	63.4	0	0	0	0	0	0	0	0	0	0	0	0	0	0	0	0	0	0
OTU_319	AGCCGCGGTAATTCCAGCTCCAATAGCGTATATTAAAGTTGTTGCGGTTAAAAAGCTCGTAGTTGGATTTCTGCTGAGGACGACCGGTCCGCCCTCTGGGTGAGTATCTGGCTTGGCCTCGGCATCTTCTTGGGAAGCGTTGCTGCACTTGACTGTGTGGCGCGATGCCCAGGACCTTTACTTTGAGGAAATTAGAGTGTTTCAAGCAGGTTTTCGCCTTGAATA	95.1	Peridiniales	Diplopsalidaceae	Diplopsalis	0	14.1	0.5	0	0	0	0	0	1.9	0	1.5	14.5	7.5	0.5	14.5	0.5	0.2	0	1.4	0	0	0	0
OTU_460	AGCCGCGGTAATTCCAGCTCCAATAGCGTATATTAAAGTTGTTGCGGTTAAAAAGCTCGTAGTTTGACCTCTGCTCAGGTAGACTGGTCCGCCCTCTGGGTGAGCATCTGGCTTGGCCTGGGCATTTTCTTGGTGATCGCAGCTGCCCTTGACTGTGTGGTGCGGAATTCAGGACATTTACGTTGAGGAAATCAGAGTGTTTCAAGCAGGCATCTGCCTTGAATA	99.6	Gonyaulacales	Ceratiaceae	Ceratium	0	0	0.5	0	1.6	0.9	0	0	1.9	1.5	0	0.9	0.5	0.9	0.4	0	0.2	0	0	1.4	0	41.1	2.9
OTU_464	AGCCGCGGTAATTCCAGCTCCAATAGCGTATATTAAAGTTGTTGCGGTTAAAAAGCTCGTAGTTTGACCTCTGCTCAGGTAGACTGGTCCGCCCTCTGGGTGAGCATCTGGCTTGGCCTGGGCATTTTCTTGGTGATTGCAGCTGCCCTTGACTGTGTGGTGCGGAATTCAGGACATTTACTTTGAGGAAATCAGAGTGTTTCAAGCAGGCATCTGCCTTGAATA	99.6	Gonyaulacales	Ceratiaceae	Ceratium	0	0	1	0	0	0.9	0	0	5.8	0.7	2.9	0	0	0.5	0.4	0	0.4	0	0	1.4	0	38.7	1.9
OTU_482	AGCCGCGGTAATTCCAGCTCCAATAGCGTATATTAAAGTTGTTGCGGTTAAAAAGCTCGTAGTTTGACCTCTGCTCAGGTAGACTGGTCCGCCCTCTGGGTGAGCATCTGGCTTGGCCTGGGCATTTTCTTGGTGATCGCAGCTGCCCTTGACTGTGTGGTTCGGAATTCAGGACATTTACTTTGAGGAAATCAGAGTGTTTCAAGCAGGCATCTGCCTTGAATA	99.6	Gonyaulacales	Ceratiaceae	Ceratium	0	0	0	0	0	1.4	0	1.3	0	0.7	0	0.9	1.6	0.5	0.4	0	0.2	0	4.1	1.9	0	36.3	1
OTU_447	AGCCGCGGTAATTCCAGCTCCAGTAGCGTATATTAAATTTGTTGCGGTTAAAAAGCTCGTAGTTGAATATATGACTTTTATCTTCACAGATTTAAGTCCAAGTTTTTGTATACTTTGAGAAAAATAGAGCGTTACAAACAAGCAATTGCAGTGTATATATTAGCATGGTATGTTTTTAGAGTGTCTCTCGTAGTTAGGAGAGTATTCTTGTTTGGATAGGGATAG	100	Dino-Group-I	Dino-Group-I-Clade-4	Dino-Group-I-Clade-4_X	0	0	2.1	0	1.6	0	0	0	0	0	4.4	0.9	2.1	1.9	1.1	1.5	0	3.6	4.1	1.4	0	21.8	2.9
OTU_508	AGCCGCGGTAATTCCAGCTCCAATAGCGTATATTAAAGTTGTTGCGGTTAAAAAGCTCGTAGTTTGACCTCTGCTCAGGTAGACTGGTCCGCCCTCTGGGTGAGCATCTGGCTTGGCCTGGGCATTTTCTTGGTGATCGCAGCTGCCCTTGACTGTGTGGTGCGGAATTCAGGACATCTACTTTGAGGAAATCAGAGTGTTTCAAGCAGGCATCTGCCTTGAATA	99.6	Gonyaulacales	Ceratiaceae	Ceratium	0	0	1.6	0	0	0.9	0	1.3	7.7	1.5	0	1.8	1.1	0.9	0	1	0.4	0	0	0	1.5	24.2	3.8
OTU_448	AGCCGCGGTAATTCCAGCTCCAGTAGCGTATATTAAATTTGTTGCGGTTAAAAAGCTCGTAGTTGAATATATGATTATTATCTTCACAGATTTTAGTCCAAATTTTTGTATACTTTGAGAAAAATAGAGCGTTACAAACAAGCAATTGCAGTGTATATATTAGCATGGTATGTTTTTAGAGTGTCTCTCGTAGTTAGGAGAGTATTCTTGTTTGGATAGGGATAG	98.1	Dino-Group-I	Dino-Group-I-Clade-4	Dino-Group-I-Clade-4_X	0	0	0.5	0	0	1.8	0	1.3	0	2.2	2.9	0.9	2.1	0.9	1.4	0.5	0.7	0	4.1	0.5	0	24.2	1.9
OTU_625	AGCCGCGGTAATTCCAGCTCCAATAGCGTATATTAAAGTTGTTGCGGTTAAAAAGCTCGTAGTTTGACCTCTGCTCAGGTAGACTGGTCCGCCCTCTGGGTGAGCATCTGGCTTGGCCTGGGCATTTTCTTGGTGATCGCAGCTGCCCTTGACTGTGTGGTGCGGAATTCAGGACATTTACTTTGAGGAAATCAGAGTGTTTCAAGCAGGCATCTGCCTTTAATA	99.6	Gonyaulacales	Ceratiaceae	Ceratium	0	0	0.5	0	1.6	0.9	0	0	0	0	0	1.8	0	0	0.7	0	0.2	0	4.1	0.5	0	24.2	1.9
OTU_619	AGCCGCGGTAATTCCAGCTCCAATAGCGTATATTAAAGTTGTTGCGGTTAAAAAGCTCGTAGTTGGATTTCTGCTGGGGACGACCGGTCCGCCCTCTGGGTGAGTATCTGGATCTGCCTTGGCATCTCCTTGGGGAACGTAGCTGCACTTGACTGTGTGGTGCGGAATCCAGGGCATTTACTTTGAGAAAATTAGAGTGTTTCAAGCAGGCACAAGCCTTGAATA	100	Dinophyceae_X	Dinophyceae_XX	Dinophyceae_XXX	0	0	4.7	2	19.5	0	0	0	0	0	0	6.3	0.5	0	0.4	0	0	0	0	0	1.5	0	0
OTU_424	AGCCGCGGTAATTCCAGCTCCAATAGCGTATATTAAAGTTGTTGCGGTTAAAAAGCTCGTAGTTGGATTTCTGCGTAGGATGATTGGTCCGCCCTCTGGGTGAGTACCCAAGTCAGCTTGCGCATCTTCATGGAGACCACAGCTGCACTTGATTGTGTGGTGTGGCATCTGTGACATTTACTTTGAGGAAATTAGAGTGTTTCAAGCAGGTGTTCGCCTGAATAT	100	Dinophyceae_X	Dinophyceae_XX	Dinophyceae_XXX	0	0	1.6	4.1	1.6	0	0.5	1.3	0	0	0	1.8	0.5	0	0.7	2	7.6	0	4.1	0.5	4.5	0	1.9
OTU_491	AGCCGCGGTAATTCCAGCTCCAATAGCGTATATTAAAGTTGTTGCGGTTAAAAAGCTCGTAGTTGGATTTCTGCCGAGGACGACCGGTCCGCCCTCTGGGTGAGTATCTGGCTCGGCCTGGGCATCTTCTTGGGGAACGTATCTGCACTTCATTGTGCGGTGCGGTACTCAAGACTTTTACTTTGAGGAAATTAGAGTGTTTCAAGCAGGCATACGCCTTGAATA	100	Peridiniales	Kryptoperidiniaceae	Unruhdinium	1.3	0	1.6	0	1.6	1.4	0	0	0	3	0	13.6	9.1	0	0.4	0	0	0	0	0	0	0	0
OTU_895	AGCCGCGGTAATTCCAGCTCCAATAGCGTATATTAAAGTTGTTGCGGTTAAAAAGCTCGTAGTTGGATTTCTGCCGAGGACGACCGGTCCGCCCTCTGGGTGAGTATCTGGCTCGGCCTGGGCATCTTCTTGGGGAACGTGTCTGCACTTCATTGTGCGGTGCGGTACTCAAGACTTTTACTTTGAGGAAATTAGAGTGTTTCAAGCAGGCATACGCCTTGAATA	99.6	Peridiniales	Kryptoperidiniaceae	Unruhdinium	0	1.3	0	2	0	0	0.5	0	0	0	0	0	0.5	0	0.4	0.5	0	0	9.7	0.5	10.5	2.4	0
OTU_820	AGCCGCGGTAATTCCAGCTCCAATAGCGTATATTAAAGTTGTTGCGGTTAAAAAGCTCGTAGTTGGATTTCTGCTGAGGACGACCGGTCCGCCCTCTGGGTGAGTATCTGGATCGGCCTGGGCATCTTCTTGGAGAACGTAGCTGCACTTGACTGTGTGGTGCGGAATCCAGGACCTTTACTTTGAGAAAATTAGAGTGTTTCAAGCAGGCACACGCCTTGAATA	99.6	Dinophyceae_X	Dinophyceae_XX	Dinophyceae_XXX	0	0	1	0	13	0.9	0	0	0	2.2	0	0	1.1	0	0	0	0	0	5.5	0.5	0	3.6	0
OTU_1053	AGCCGCGGTAATTCCAGCTCCAATAGCGTATATTAAAGTTGTTGCGGTTAAAAAGCTCGTAGTTGGATTTCTGCCGAGGACGACCGGTCCGCCCACTGGGTGTGTATCTGGCTCGGCCTGGGCATCTTCTTGGAGAACGTAGCTGCACTTGATTGTGTGGTGCGGTATCCAGGACTTTTACTTTGAGGAAATTAGAGTGTTTCAAGCAGGCACACGCCTTGAATA	100	Peridiniales	Thoracosphaeraceae	Apocalathium	4	3.8	0	6.1	0	0	0	0	1.9	0	0	0.9	0	0	0	0	0	10.9	0	0	0	0	0
OTU_669	AGCCGCGGTAATTCCAGCTCCAATAGCGTATATTAAAGTTGTTGCGGTTAAAAAGCTCGTAGTTGGATTTCTGCGTAGGACGACTGGTCCGCCCTCTGGGTGAGCATCTGGGTCAGCCTGTGCATCCTCGTGGAGAACGCAGCTGCACTTGATTGTGTGGTGTGGTATCTGCGACTTTTACTTTGAGGAAATTAGAGTGTTTCAAGCAGGTATGCGCCTGAATAC	99.1	Dinophyceae_X	Tovelliaceae	Woloszynskia	0	0	6.3	0	8.1	0	0.5	0	0	0	0	0.9	1.6	0	0.4	0	0	0	9.7	0	0	0	0
OTU_421	AGCCGCGGTAATTCCAGCTCCAATAGCGTATATTAAAGTTGTTGCGGTTAAAAAGCTCGTAGTTGGATTTCTGCCGAGGACAACCGACCGGCCCAAACGGGCTTGTGTCTGGTTTGACCGAGGCATCCTCTTGGAAGACGTGTGGTACTTAACTGTGCCCACGGAGTCCAGGACTTTTACTTTGAGGAAATTAGAGTGTTTCAAACAGGCGTTCGCCGTGAATAC	95.6	Prorocentrales	Prorocentraceae	Prorocentrum	0	0	0	0	0	0	0	0	0	0	0	0	0	26.5	0.7	0	0	0	0	0	0	0	0
OTU_824	AGCCGCGGTAATTCCAGCTCCAATAGCGTATATTAAAGTTGTTGCGGTTAAAAAGCTCGTAGTTTGACCTCTGCTCAGGTAGACTGGTCCGCCCTCTGGGTGAGCATCTGGCTTGGCCTGGGCATTTTCTTGGTGATCGCAGCTGCCCTTGACTGTGTGGTGCGGAATTCAGGACATTTACTTTGAGGAAATCAGAGTGTTTCAAGCAGGCATCTGCCTTGACTA	100	Gonyaulacales	Ceratiaceae	Ceratium	0	0	0	0	0	0	0	0	0	0	0	0.9	1.6	0	0.4	0	0.2	0	0	0.5	0	21.8	0
OTU_496	AGCCGCGGTAATTCCAGCTCCAATAGCGTATATTAAAGTTGTTGCGGTTAAAAAGCTCGTAGTTGGGTTTCTGCTGAGGACGACCGGTCCGCCCTCTGGGTGAGTATCTGGCTCGGCCTGGGCATCTTCTTGGAGAACGTAGCTGCACTTGACTGTGTGGTGCGGTATCCAGGACTTTTACTTTGAGGAAATTAGAGTGTTTCAAGCAGGCACACGCCTTGAATA	100	Peridiniales	Thoracosphaeraceae	Naiadinium	0	0	0	0	1.6	0	1.6	0	11.5	0	0	0.9	0	0	0	0	7.2	0	0	0	0	2.4	0
OTU_721	AGCCGCGGTAATTCCAGCTCCAATAGCGTATATTAAAGTTGTTGCGGTTAAAAAGCTCGTAGTTGGATTTCTGCCAAGGACGACCGGTCCGCCCTCTGGGTGAGTATCTGGCTCGGCCCAGGCATCTTCTTGGAGAACGTTGCTGCACTTGACTGTGTGGTGCGGTATTCAAGACCTTTACTTTGAGAAAATTAGAGTGTTTCAAGCAGGCACATGCCTTGAATA	96.4	Dinophyceae_X	Dinophyceae_XX	Dinophyceae_XXX	2	0	0	2	0	0	5.4	0	7.7	0	0	0	0	0	0	0	0	0	0	0	7.5	0	0
OTU_1022	AGCCGCGGTAATTCCAGCTCCAATAGCGTATATTAAAGTTGTTGCGGTTAAAAAGCTCGTAGTTTGACCTCTGCTCAGGTAGACTGGTCCGCCCTCTGGGTGAGCATCTGGCTTGGCCTGGGCATTTTCTTGGTGATCGCAGCTGCCCTTGACTGTGGGGTGCGGAATTCAGGACATTTACTTTGAGGAAATCAGAGTGTTTCAAGCAGGCATCTGCCTTGAATA	99.6	Gonyaulacales	Ceratiaceae	Ceratium	0	0	0	0	1.6	0	0	0	0	0	0	0	0	0.5	0	0.5	0	0	0	0	0	20.6	1
OTU_698	AGCCGCGGTAATTCCAGCTCCAATAGCGTATATTAAAGTTGTTGCGGTTAAAAAGCTCGTAGTTGGATTTCTGTCGAGGACGACCGGTCCGCCCTCTGGGTGAGTATCTGGCTCGGCCTGGACATCTTCTTGGGGAACGTGTCTGCACTTCATTGTGCGGTGCGGTACTCAAGACTTTTACTTTGAGGAAATTAGAGTGTTTCAAGCAGGCACACGCCTTGAATA	98.7	Peridiniales	Kryptoperidiniaceae	Unruhdinium	0	0	0	0	0	0	0	0	0	0	0	12.7	6.4	0.5	0	0.5	0.2	0	0	0.5	0	0	0
OTU_715	AGCCGCGGTAATTCCAGCTCCAATAGCGTATATTAAAGTTGTTGCGGTTAAAAAGCTCGTAGTTGGATTTCTGCATAGGATGACTGGTCCGCCCTCTGGGTGAGTATCTGGGTCAGCCTCTGCATCTTCATGGAGAACGCAGCTGCACTTGATTGTGTGGTGCGGTATCTGTGACCTTTACTTTGAGGAAATTAGAGTGTTTCAAGCAGGTACGTGCCTGAATAC	99.6	Dinophyceae_X	Tovelliaceae	Tovellia	0	0	0.5	0	0	0	0	1.3	0	0	0	0.9	0	0.5	1.4	0	0	0	2.8	6	6	0	0
OTU_1278	AGCCGCGGTAATTCCAGCCCCAATAGCGTATATTAAAGTTGTTGCGGTTAAAAAGCTCGTAGTTTGACCTCTGCTCAGGTAGACTGGTCCGCCCTCTGGGTGAGCATCTGGCTTGGCCTGGGCATTTTCTTGGTGATCGCAGCTGCCCTTGACTGTGTGGTGCGGAATTCAGGACATTTACTTTGAGGAAATCAGAGTGTTTCAAGCAGGCATCTGCCTTGAATA	99.6	Gonyaulacales	Ceratiaceae	Ceratium	0	0	0	0	1.6	0.5	0	1.3	0	0	0	0	0	0	0	0	0	0	0	0	1.5	14.5	0
OTU_1318	AGCCGCGGTAATTCCAGCTCCAATAGCGTATATTAAAGTTGTTGCGGTTAAAAAGCTCGTAGTTTGACCTCTGCTCAGGTAGACTGGTCCGCCCTCTGGGTGAGCATCTGGCTTGGCCTGGGCATTTTCTTGGTGATCGCAGCTGCCCTTGACTGTGTGGTGCGGAATTCAGGACATTTACTTTGAGGACATCAGAGTGTTTCAAGCAGGCATCTGCCTTGAATA	99.6	Gonyaulacales	Ceratiaceae	Ceratium	0	0	0	0	0	0	0	1.3	0	0	0	0.9	0	0	0	0	0	0	0	0	0	15.7	1
OTU_872	AGCCGCGGTAATTCCAGCTCCAATAGCGTATATTAAAGTTGTTGCGGTTAAAAAGCTCGTAGTTGGATTTCTGCATAGGATGACTGGTCCGCCCTCTGGGTGAGTATCTGGGTCGGCCTGTGCATCTTCGTGGAGAACGCAGCTGCACTTGATTGTGTGGTGCGGTATCTGCGACCTTTACTTTGAGGAAATTAGAGTGTTTCAAGCAGGTATTCGCCTGAATAC	97.3	Dinophyceae_X	Tovelliaceae	Woloszynskia	0	0	0.5	0	0	0	0	0	0	0	0	0.9	1.1	0	0.4	1	0.2	0	9.7	3.2	1.5	0	0
OTU_1319	AGCCGCGGTAATTCCAGCTCCAATAGCGTATATTAAAGTTGTTGCGGTTAAAAAGCTCGTAGTTTGACCTCTGCTCAGGTAGACTGGTCCGCCCTCTGGGTGAGCATCTGGCTTGGCCTGGGCATTTTCTTGGTGATCGCAGCTGCCCTTGACTGTGTGGTGCGGAATTCAGGACATTTACTTTGCGGAAATCAGAGTGTTTCAAGCAGGCATCTGCCTTGAATA	99.6	Gonyaulacales	Ceratiaceae	Ceratium	0	0	0	0	0	0.5	0	1.3	0	0	0	0	0	0	0	0	0	0	2.8	0.5	0	13.3	0
OTU_1158	AGCCGCGGTAATTCCAGCTCCAATAGCGTATATTAAAGTTGTTGCGGTTAAAAAGCTCGTAGTTTGACCTCTGCTCAGGTAGACTGGTCCGCCCTCTGGGTGAGCATCTGGCTTGGCCTGGGCATTTTCTTGGTGATCGCAGCTGCCCTTGACTGTGTGGTGCGGAATTCAGGACATTTACTTTGAGGAAATCAGAGTGTTTCAATCAGGCATCTGCCTTGAATA	99.6	Gonyaulacales	Ceratiaceae	Ceratium	0	0	0	0	0	0	0	1.3	0	0	0	0.9	0	0	0.4	1	0	0	1.4	0.9	0	12.1	0
OTU_1149	AGCCGCGGTAATTCCAGCTCCAATAGCGTATATTAAAGTTGTTGCGGTTAAAAAGCTCGTAGTTTGACCTCTGCTCAGGTAGACTGGTCCGCCCTCTGGGTGAGCATCTGGCTTGGCCTGGGCATTTTCTTGGTGATCGCAGCTGCCCTTGACTGTGTGGTGCGGAATTCAGGACATTTACTTTGAGGAAATCAGAGTGTTTCAAGCAAGCATCTGCCTTGAATA	99.6	Gonyaulacales	Ceratiaceae	Ceratium	0	0	0.5	0	0	0	0	0	0	0.7	0	0	1.6	0.9	0	0.5	0	0	1.4	0	0	12.1	0
OTU_1845	AGCCGCGGTAATTCCAGCTCCAATAGCGTATATTAAAGTTGTTGCGGTTAAAAAGCTCGTAGTTGGATTTCTGCTTAGGTAGACTGGTCCGCCCTCTGGGTGAGCATCTGGCTTGGCCTGGGCATTTTCTTGGTGATCGCAGCTGCCCTTGACTGTGTGGTGTGGAACTCAGGCCTTTTACTTTGAGGAAATCAGAGTGCTTCAAGCAGGTATCTGCCTTGAATA	98.2	Gonyaulacales	Ceratiaceae	Ceratium	0	0	0.5	0	16.3	0	0	0	0	0	0	0	0	0	0.4	0	0	0	0	0	0	0	0
OTU_1533	AGCCGCGGTAATTCCAGCTCCAATAGCGTATATTAAAGTTGTTGCGGTTAAAAAGCTCGTAGTTTGACCTCTGCTCAGGTAGACTGGTCCGCCCTCTGGGTGAGCATCTGGCTTGGCCTGGGCATTTTCTTGGTGATCGCAGCTGCCCTTGACTGTGTGGTGCGGAATTCAGGACATTTACTTTGAGGAAATCAGAGTGTTTCAAGCAGGCATCTGCATTGAATA	99.6	Gonyaulacales	Ceratiaceae	Ceratium	0	0	0	0	0	0	0	0	0	0	0	0	0	0	0	0	0	0	0	0	0	16.9	0
OTU_1417	AGCCGCGGTAATTCCAGCTCCACTAGCGTATATTAAAGTTGTTGCGGTTAAAAAGCTCGTAGTTTGACCTCTGCTCAGGTAGACTGGTCCGCCCTCTGGGTGAGCATCTGGCTTGGCCTGGGCATTTTCTTGGTGATCGCAGCTGCCCTTGACTGTGTGGTGCGGAATTCAGGACATTTACTTTGAGGAAATCAGAGTGTTTCAAGCAGGCATCTGCCTTGAATA	99.6	Gonyaulacales	Ceratiaceae	Ceratium	0	0	0	0	0	0.5	0	0	0	0	0	0	0.5	0	0	0	0	0	1.4	0	0	13.3	1
OTU_1418	AGCCGCGGTAATTCCAGCTCCAATAGCGTATATTAAAGTTGTTGCGGTTAAAAAGCTCGTAGTTTGACCTCTGCTCAGGTAGACTGGTCCGCCCTCTGGGTGAGCATCTGGCTTGGCCTGGGCATTTTCTTGGTGATCGCAGCTGCCCTTGACTGTGTGGCGCGGAATTCAGGACATTTACTTTGAGGAAATCAGAGTGTTTCAAGCAGGCATCTGCCTTGAATA	99.6	Gonyaulacales	Ceratiaceae	Ceratium	0	0	0.5	0	1.6	0	0	0	0	0	0	0	0.5	0.5	0	0	0	0	0	0	0	13.3	0
OTU_1243	AGCCGCGGTAATTCCAGCTCCAATAGCGAATATTAAAGTTGTTGCGGTTAAAAAGCTCGTAGTTTGACCTCTGCTCAGGTAGACTGGTCCGCCCTCTGGGTGAGCATCTGGCTTGGCCTGGGCATTTTCTTGGTGATCGCAGCTGCCCTTGACTGTGTGGTGCGGAATTCAGGACATTTACTTTGAGGAAATCAGAGTGTTTCAAGCAGGCATCTGCCTTGAATA	99.6	Gonyaulacales	Ceratiaceae	Ceratium	0	0	0	0	0	0	0	1.3	3.8	0	0	0	0	0.5	0.7	0.5	0	0	1.4	0.9	0	7.3	0
OTU_1484	AGCCGCGGTAATTCCAGCTCCAATAGCGTATATTAAAGTTGTTGCGGTTAAAAGGCTCGTAGTTTGACCTCTGCTCAGGTAGACTGGTCCGCCCTCTGGGTGAGCATCTGGCTTGGCCTGGGCATTTTCTTGGTGATCGCAGCTGCCCTTGACTGTGTGGTGCGGAATTCAGGACATTTACTTTGAGGAAATCAGAGTGTTTCAAGCAGGCATCTGCCTTGAATA	99.6	Gonyaulacales	Ceratiaceae	Ceratium	0	0	0	0	0	0	0	0	1.9	0	0	0	0	0	0.4	0	0.2	0	0	0	3	9.7	1
OTU_1222	AGCCGCGGTAATTCCAGCTCCAATAGCGTATATTAAAGTTGTTGCGGTTAAAAAGCTCGTAGTTTGACCTCTGCTCAGGTAGACTGGTCCGCCCTCTGGGTGAGCATCTGGCTTGGCCTGGGCATTTTCTTGGTGATCGCAGCTGCCCTTGACTGTGTGGTGCGGAATTCAGGACATTTACTCTGAGGAAATCAGAGTGTTTCAAGCAGGCATCTGCCTTGAATA	99.6	Gonyaulacales	Ceratiaceae	Ceratium	0	0	0.5	0	1.6	0	0	0	0	0	0	0	0	0	1.1	0.5	0.2	0	0	0	0	10.9	1
OTU_1491	AGCCGCGGTAATTCCAGCTCCAATAGCGTATATTAAAGTTGTTGCGGTTAAAAAGCTCGTAGTTTGACCTCTGCTCAGGTAGACTGGTCCGCCCTCCGGGTGAGCATCTGGCTTGGCCTGGGCATTTTCTTGGTGATCGCAGCTGCCCTTGACTGTGTGGTGCGGAATTCAGGACATTTACTTTGAGGAAATCAGAGTGTTTCAAGCAGGCATCTGCCTTGAATA	99.6	Gonyaulacales	Ceratiaceae	Ceratium	0	0	0	0	1.6	0.5	0	0	0	0	0	0	0	0	0.4	0.5	0.2	0	1.4	0	1.5	9.7	0
OTU_1320	AGCCGCGGTAATTCCAGCTCCAATAGCGTATATTAAAGTTGTTGCGGTTAAAAAGCTCGTAGTTTGACCTCTGCTCAGGTAGACTGGTCCGCCCTCTGGGTGAGCATCTGGCTTGGCCTGGGCATTTTCTTGGTGATCGCAGCTGCCCTTGACTGTGTGGTGCGGAATTCAGGACATTTACTTTGAGGAAATCAGAGTGTTTCAAGCAGGCATCTGCCTTGAATC	100	Gonyaulacales	Ceratiaceae	Ceratium	0	0	0	0	0	0.9	0	0	0	0	1.5	0	0	0.5	0.7	0	0	0	0	0	0	12.1	0
OTU_1549	AGCCGCGGTAATTCCAGCTCCAATAGCGTATATTAAAGTTGTTGCGGTTAAAAAGCTCGTAGTTTGACCTCTGCTCAGGTAGACTGGTCCGCCCTCTGGGTGAGCATCTGGCTTGGCCTGGGCATTTTCTTGGTGATCGCAGCTGCCCTTGACTGTGTGGTACGGAATTCAGGACATTTACTTTGAGGAAATCAGAGTGTTTCAAGCAGGCATCTGCCTTGAATA	99.6	Gonyaulacales	Ceratiaceae	Ceratium	0	0	0	0	1.6	0	0	0	0	0	0	0.9	0	0	0.4	0	0	0	1.4	0.5	0	9.7	1
OTU_1217	AGCCGCGGTAATTCCAGCTCCAATAGCGTATATTAAAGTTGTTGCGGTTAAAAAGCTCGTAGTTTGGCCTCTGCTCAGGTAGACTGGTCCGCCCTCTGGGTGAGCATCTGGCTTGGCCTGGGCATTTTCTTGGTGATCGCAGCTGCCCTTGACTGTGTGGTGCGGAATTCAGGACATTTACTTTGAGGAAATCAGAGTGTTTCAAGCAGGCATCTGCCTTGAATA	99.6	Gonyaulacales	Ceratiaceae	Ceratium	0	0	1	0	0	0.5	0	0	0	0.7	0	0	1.1	0.5	0	0	0	0	1.4	0.5	0	9.7	0
OTU_2650	AGCCGCGGTAATTCCCATCCAATAGCGTATATTAAAGTTGTTGCGGCTAAAAAGCTCGTAGTTGGATTTCTGCTTAGGTAGACTGGTCCGCCCTCTGGGTGAGCATCTGGCTTGGCCTGGGCATTTTCTTGGTGATCGCAGCTGCCCTTGACTGTGTGGTGTGGAACTCAGGACTTTTACTTTGAGGAAATCAGAGTGCTTCAAGCAGGTATCTGCCTTGAATAA	97.3	Gonyaulacales	Ceratiaceae	Ceratium	0	0	0	0	14.6	0	0	0	0	0	0	0	0	0	0	0	0	0	0	0	0	0	0
OTU_1317	AGCCGCGGTAATTCCAGCTCCAATAGCGTATATTAAAGTTGTTGCGGTTAAAAAGCTCGTAGTTGGATTTCTGCCGAGGACGACCGCCCAACCCAAACGGGTTTGCGGCTGGTTAGACCGAGGCATCCTCTTGGAAGACGTGTTCCACTTTACTGTGGTCACGGAGTCCAGGACTTTTACTTTGAGGAAATTAGAGTGTTTCAAACAGGCGTTCGCCGTGAATAC	98.2	Prorocentrales	Prorocentraceae	Prorocentrum	0	0	0	0	0	0	0	0	0	0	0	11.8	0	0	0.4	0	0	0	0	0	0	2.4	0
OTU_1538	AGCCGCGGTAATTCCAGCTCCAATAGCGTATATTAAAGTTGTTGCGGTTAAAAAGCTCGTAGTTTGACCTCTGCTCAGGTAGACTGGTCCGCCCTCTGGGTGGGCATCTGGCTTGGCCTGGGCATTTTCTTGGTGATCGCAGCTGCCCTTGACTGTGTGGTGCGGAATTCAGGACATTTACTTTGAGGAAATCAGAGTGTTTCAAGCAGGCATCTGCCTTGAATA	99.6	Gonyaulacales	Ceratiaceae	Ceratium	0	0	0	0	0	0.5	0	1.3	0	0	0	0	0	0.5	0	0	0.2	0	1.4	0	0	9.7	1
OTU_1312	AGCCGCGGTAATTCCAGCTCCAATAGCGTATATTAAAGTTGTTGCGGTTAAAAAGCTCGTAGTTTGACCTCTGCTCAGGTAGACTGGTCCGCCCTCTGGGTGAGCATCTGGCTTGGCCTGGGCATTTTCTTGGTGATCGCAGCTGCCCTTGACTGTGTGGTGCGGAATTCAGGACATTTACTTTGAGGAAATCAGAGTGCTTCAAGCAGGCATCTGCCTTGAATA	99.6	Gonyaulacales	Ceratiaceae	Ceratium	0	0	1	0	0	0	0	0	0	0.7	0	0	0.5	0	0.4	0	0.2	0	1.4	0.5	0	9.7	0
OTU_1562	AGCCGCGGTAATTCCAGCTCCAATAGCGTATATTAAAGTTGTTGCGGTTAAAAAGCTCGTAGTTTGACCTCTGCTTAGGTAGACTGGTCCGCCCTCTGGGTGAGCATCTGGCTTGGCCTGGGCATTTTCTTGGTGATCGCAGCTGCCCTTGACTGTGTGGTGCGGAATTCAGGACATTTACTTTGAGGAAATCAGAGTGTTTCAAGCAGGCATCTGCCTTGAATA	99.6	Gonyaulacales	Ceratiaceae	Ceratium	0	0	0	0	0	0.5	0	0	0	0.7	1.5	1.8	0	0	0.4	0	0	0	0	0	0	8.5	1
OTU_2058	AGCCGCGGTAATTCCAGCTCCAATAGCGTATATTAAAGTTGTTGCGGTTAACAAGCTCGTAGTTTGACCTCTGCTCAGGTAGACTGGTCCGCCCTCTGGGTGAGCATCTGGCTTGGCCTGGGCATTTTCTTGGTGATCGCAGCTGCCCTTGACTGTGTGGTGCGGAATTCAGGACATTTACTTTGAGGAAATCAGAGTGTTTCAAGCAGGCATCTGCCTTGAATA	99.6	Gonyaulacales	Ceratiaceae	Ceratium	0	0	0.5	0	3.3	0	0	0	0	0	0	0	0	0	0	0	0	0	4.1	0	0	6	0
OTU_1828	AGCCGCGGTAATTCCAGCTCCAATAGCGTATATTAAAGTTGTTGCGGTTAAAAAGCTCGCAGTTTGACCTCTGCTCAGGTAGACTGGTCCGCCCTCTGGGTGAGCATCTGGCTTGGCCTGGGCATTTTCTTGGTGATCGCAGCTGCCCTTGACTGTGTGGTGCGGAATTCAGGACATTTACTTTGAGGAAATCAGAGTGTTTCAAGCAGGCATCTGCCTTGAATA	99.6	Gonyaulacales	Ceratiaceae	Ceratium	0	0	0	0	0	0	0	0	0	0	0	0	0	0	0.4	0	0	0	1.4	0	0	12.1	0
OTU_2288	AGCCGCGGTAATTCCAGCTCCAATAGCGTATATTAAAGTTGTTGCGGTTAAAAAGCTCGTAGTTGGATTTCTGCCGAGGACGACCGGTCCGCCCTCCGGGTGAGCATCTGGTTCGGCCTGGGCATCTTCTTGGAGAACGTCGCTGCACTTGACTGTGTGGTGCGGTATCCAGGACTTTTACTTTGAGGAAATTAGAGTGTTTCAAGCAGGCACACGCCTTGAATA	99.1	Dinophyceae_X	Dinophyceae_XX	Dinophyceae_XXX	0	0	0	0	0	0	0	0	0	0	0	0	0	0	0	0	0	0	13.8	0	0	0	0
OTU_1535	AGCCGCGGTAATTCCAGCTCCAATAGCGTATATTAAAGTTGTTGCGGTTAAAAAGCTCGTAGTTTGACCTCTGCTCAGGTAGACTGGTCCGCCCTCTGGGTGAGCATCTGGCTTGGCCTGGGCATTTTCTTGGTGATCGCAGCTGCCCTTGACTGTGTGGTGCGGAATTCAGGACATTTACTTTGAGGCAATCAGAGTGTTTCAAGCAGGCATCTGCCTTGAATA	99.6	Gonyaulacales	Ceratiaceae	Ceratium	0	0	0.5	0	0	0	0	0	0	0	0	0.9	0	0	0	0	0	0	0	1.4	0	10.9	0
OTU_951	AGCCGCGGTAATTCCAGCTCCAATAGCGTATATTAAAGTTGTTGCGGTTAAAAAGCTCGTAGTTGGATTTCTGCCGAGGACGACCGGTCCGCCCTCTGGGTGAGTATCTGGCTCGGCCTGGGCATCTTCTTGGGGAACGTGTCTGCACTTCATTGTGCGGTGCGGTACTCAAGACTTTTACTTTGAGGAAATTAGAGTGTTTCAAGCAGGCACACGCCTTGAATA	99.1	Peridiniales	Kryptoperidiniaceae	Unruhdinium	0	0	0	0	0	0	0	0	0	0	1.5	6.3	4.3	0	1.1	0.5	0	0	0	0	0	0	0
OTU_1746	AGCCGCGGTAATTCCAGCTCCAATAGCGTATATTAAAGTTGTTGCGGTTAAAAAGCTCGTAGTTTGACCTCTGCTCAGGTAGACTGGTCCGCCCTCTGGGCGAGCATCTGGCTTGGCCTGGGCATTTTCTTGGTGATCGCAGCTGCCCTTGACTGTGTGGTGCGGAATTCAGGACATTTACTTTGAGGAAATCAGAGTGTTTCAAGCAGGCATCTGCCTTGAATA	99.6	Gonyaulacales	Ceratiaceae	Ceratium	0	0	0	0	0	0	0	1.3	0	0	0	0	0	0	0	0	0	0	1.4	0	0	10.9	0
OTU_832	AGCCGCGGTAATTCCAGCTCCAATAGCGTATATTAAAGTTGTTGCGGTTAAAAAGCTCGTAGTTGGATTTCTGCTGGGGACGACCGGTCCGCCCTCTGGGTGAGTATCTGGATCTGCCTTGGCATCTCCCTGGGGAACGTAGCTGCACTTGACTGTGTGGTGCGGAACCCAGGGCATTTACTTTGAGAAAATTAGAGTGTTTCAAGCAGGCACAAGCCTTGAATA	99.1	Dinophyceae_X	Dinophyceae_XX	Dinophyceae_XXX	0	0	0	0	0	0	0	0	0	0	0	0	0	0	0	0	4.9	7.3	1.4	0	0	0	0
OTU_1950	AGCCGTGGTAATTCCAGCTCCAATAGCGTATATTAAAGTTGTTGCGGTTAAAAAGCTCGTAGTTTGACCTCTGCTCAGGTAGACTGGTCCGCCCTCTGGGTGAGCATCTGGCTTGGCCTGGGCATTTTCTTGGTGATCGCAGCTGCCCTTGACTGTGTGGTGCGGAATTCAGGACATTTACTTTGAGGAAATCAGAGTGTTTCAAGCAGGCATCTGCCTTGAATA	99.6	Gonyaulacales	Ceratiaceae	Ceratium	0	0	0	0	0	0.5	0	1.3	0	0	0	0	0	0	0	0	0	0	0	0	4.5	6	1
OTU_1171	AGCCGCGGTAATTCCAGCTCCAATAGCGTATATTAAAGTTGTTGCGGTTAAAAAGCTCGTAGCTTGACCTCTGCTCAGGTAGACTGGTCCGCCCTCTGGGTGAGCATCTGGCTTGGCCTGGGCATTTTCTTGGTGATCGCAGCTGCCCTTGACTGTGTGGTGCGGAATTCAGGACATTTACTTTGAGGAAATCAGAGTGTTTCAAGCAGGCATCTGCCTTGAATA	99.6	Gonyaulacales	Ceratiaceae	Ceratium	0	0	0	0	0	0.9	0	1.3	0	0.7	0	1.8	0	0	0.4	0.5	0	0	2.8	0	0	4.8	0
OTU_1686	AGCCGCGGTAATTCCAGCTCCAATAGCGTATATTAAAGTTGTTGCGGTTAAAAAGCTCGTAGTTTGACCTCTGCTCAGGTAGACTGGTCCGCCCTCTGGGTGAGCATCTGGCTTGGCCTGGGCATTTTCTTGGTGATCGCAGCTGCCCTTGACCGTGTGGTGCGGAATTCAGGACATTTACTTTGAGGAAATCAGAGTGTTTCAAGCAGGCATCTGCCTTGAATA	99.6	Gonyaulacales	Ceratiaceae	Ceratium	0	0	0	0	1.6	0.5	0	0	0	0.7	1.5	0.9	0.5	0	0	0.5	0	0	0	0.5	0	6	0
OTU_1680	AGCCGCGGTAATTCCAGCTCCAATAGCGTATATTAAAGTTGTTGCGGTTAAAAAGCTCGTAGTTTGACCTCTGCTCAGGTAGACTGGTCCGCCCTCTGGGTGAGCATCTGGCTTGGCCTGGGCATTTTCTTGGTGATCGCAGCTGCCCTTGACTGTGTGGTGCGGAATTCAGGACATTTACTTTGAGGAAATCAGAGTGTTTCGAGCAGGCATCTGCCTTGAATA	99.6	Gonyaulacales	Ceratiaceae	Ceratium	0	0	0	0	0	0	0	0	0	0.7	1.5	0	0	0.9	0	0	0	0	1.4	0.9	0	6	1
OTU_2641	AGCCGCGGTAATTCCAGCTCCAATAGCGTATATTAAAGTTGTTGCGGTTAAAAAGCTCGTAGTTGGATTTCTGCCGAGGACGACCGGTCCGCCCTCTGGGTGTGCATCTGGCTCGGCCTGGGCATCTTCTTGGAGAACGTATCTGCACTTCATTGTGTGGTGTGGTATCCAGGACCTTTACTTTGAGGAAATTAGAGTGTTTCAAGCAGGCACACGCCTTGAATA	98.7	Peridiniales	Thoracosphaeraceae	Thoracosphaeraceae_X	0	0	0	0	0	0	0	0	0	0	0	0	0	0	0	0	0	0	12.4	0	0	0	0
OTU_903	AGCCGCGGTAATTCCAGCTCCAATAGCGTATATTAAAGTTGTTGCGGTTAAAAAGCTCGTAGTTGGATTTCTGCCTAGGACAACCGACCGACCCATACGGGTTTGTGTCTGGTTTGACCGAGGCATCCTCTTGGAAGACGTGCGCCCTTGTGGCCACGGAGTCCAGGACTTTTACTTTGAGGAAATTAGAGTGTTTCAAACAGGCGTTCGCCGTGAATACATTAG	96.9	Prorocentrales	Prorocentraceae	Prorocentrum	10	0	0	0	0	0	0	0	0	0	0	0	0	0	0	0	0	0	0	0	0	2.4	0
OTU_1905	AGCCGCGGTAATTCCAGCTCCAATAGCGTATATTAAAGTTGTTGCGGTTAAAAAGCTCGTAGTTTGACCTCTGCTCAGGTAGACTGGTCCGCCCTCTGGGTGAGCATCTGGCTTGGCCTGGGCATTTTCTTGGTGATCGCAGCTGCCCTTGACTGTGTGGTGCGGAATTCAGGACACTTACTTTGAGGAAATCAGAGTGTTTCAAGCAGGCATCTGCCTTGAATA	99.6	Gonyaulacales	Ceratiaceae	Ceratium	0	0	0	0	0	0	0	0	1.9	0	0	0	0.5	0	0	0	0.2	0	0	0	0	9.7	0
OTU_2024	AGCCGCGGTAATTCCAGCTCCAATAGCGTATATTAAAGTTGTTGCGGTTAAAAAGCTCGTAGTTTGACCTCTGCTCAGGTAGACTGGTCCGCCCTCTGGGTGAGCATCTGGCTTGGCCTGGGCATTTTCTTGGTGATCGCAGCTGCCCTTGACTGTGTGGTGCGGAATTCAGGACATTTACTTCGAGGAAATCAGAGTGTTTCAAGCAGGCATCTGCCTTGAATA	99.6	Gonyaulacales	Ceratiaceae	Ceratium	0	0	0	0	0	0	0	0	0	0	0	0	0	0	0.4	0	0	0	0	0	0	10.9	1
OTU_1358	AGCCGCGGTAATTCCGGCTCCAATAGCGTATATTAAAGTTGTTGCGGTTAAAAAGCTCGTAGTTTGACCTCTGCTCAGGTAGACTGGTCCGCCCTCTGGGTGAGCATCTGGCTTGGCCTGGGCATTTTCTTGGTGATCGCAGCTGCCCTTGACTGTGTGGTGCGGAATTCAGGACATTTACTTTGAGGAAATCAGAGTGTTTCAAGCAGGCATCTGCCTTGAATA	99.6	Gonyaulacales	Ceratiaceae	Ceratium	0	0	0.5	0	0	0.5	0	0	0	0	0	0	0	0.9	0	0.5	0	0	0	0	0	9.7	0
OTU_2026	AGCCGCGGTAATTCCAGCTCCAATAACGTATATTAAAGTTGTTGCGGTTAAAAAGCTCGTAGTTTGACCTCTGCTCAGGTAGACTGGTCCGCCCTCTGGGTGAGCATCTGGCTTGGCCTGGGCATTTTCTTGGTGATCGCAGCTGCCCTTGACTGTGTGGTGCGGAATTCAGGACATTTACTTTGAGGAAATCAGAGTGTTTCAAGCAGGCATCTGCCTTGAATA	99.6	Gonyaulacales	Ceratiaceae	Ceratium	0	0	0	0	0	0	0	0	0	0	0	0	0	0	0	0	0	0	0	0	0	12.1	0
OTU_823	AGCCGCGGTAATTCCAGCTCCAATAGCGTATATTAAAGTTGTTGCGGTTAAAAAGCTCGTAGTTGGATTTCTGCCGAGGACGACCGACCGACCCATACGGGTTTGTGTATGGTTAGACCGAGGCATCCTCTTGGAAGACGTGCCCACTTTACCGTGGCTACGGAGTCCAGGACTTTTACTTTGAGGAAATTAGAGTGTTTCAAACAGGCGTTCGCCGTGAATACA	96.9	Prorocentrales	Prorocentraceae	Prorocentrum	0	0	12	0	0	0	0	0	0	0	0	0	0	0	0	0	0	0	0	0	0	0	0
OTU_993	AGCCGCGGTAATTCCAGCTCCAATAGCGTATATTTAAGTTGTTGCAGTTAAAAAGCTCGTAGTTTGACCTCTGCTCAGGTAGACTGGTCCGCCCTCTGGGTGAGCATCTGGCTTGGCCTGGGCATTTTCTTGGTGATCGCAGCTGCCCTTGACTGTGTGGTGCGGAATTCAGGACATTTACTTTGAGGAAATCAGAGTGTTTCAAGCAGGCATCTGCCTTGAATA	99.1	Gonyaulacales	Ceratiaceae	Ceratium	0	0	0	0	1.6	0.5	0	0	1.9	0.7	0	0.9	5.3	0.5	0	0.5	0	0	0	0	0	0	0
OTU_2308	AGCCGCGGTAATTCCAGCTCCAATAGCGTATATTGAAGTTGTTGCGGTTAAAAAGCTCGTAGTTTGACCTCTGCTCAGGTAGACTGGTCCGCCCTCTGGGTGAGCATCTGGCTTGGCCTGGGCATTTTCTTGGTGATCGCAGCTGCCCTTGACTGTGTGGTGCGGAATTCAGGACATTTACTTTGAGGAAATCAGAGTGTTTCAAGCAGGCATCTGCCTTGAATA	99.6	Gonyaulacales	Ceratiaceae	Ceratium	0	0	0	0	0	0	0	0	0	0.7	0	0	0	0	0	0	0	0	1.4	0	0	9.7	0
OTU_2309	AGCCGCGGTAATTCCAGCTCCAATAGCGTATATTAAAGTTGTTGCGGTTAAAAAGCTCGTAGTTTGACCTCTGCTCAGGTAGACTGGTCCGCCCTCTGGGTGAGCATCTGGCTTGGCCTGGACATTTTCTTGGTGATCGCAGCTGCCCTTGACTGTGTGGTGCGGAATTCAGGACATTTACTTTGAGGAAATCAGAGTGTTTCAAGCAGGCATCTGCCTTGAATA	99.6	Gonyaulacales	Ceratiaceae	Ceratium	0	0	0	0	0	0	0	0	0	0	0	0	0	0	0.4	0	0	0	2.8	0	0	8.5	0
OTU_1825	AGCCGCGGTAATTCCAGCTCCAATAGCGTATATTAAAGTTGTTGCGGTTAAAAAGCTCGTAGTTTGACCTCTGCTCAGGTAGACTGGTCCGCCCTCTGGGTGAGCATCTGGCTTGGCCTGGGCATTTTCTTGGTGATCGCAGCTGCCCTTGACTGCGTGGTGCGGAATTCAGGACATTTACTTTGAGGAAATCAGAGTGTTTCAAGCAGGCATCTGCCTTGAATA	99.6	Gonyaulacales	Ceratiaceae	Ceratium	0	0	0	0	0	0.5	0	0	0	0	0	0	0	0.5	0.4	0	0	0	0	0.5	0	9.7	0
OTU_2322	AGCCGCGGTAATTCCAGCTCCAATAGCGTATATTAAAGTTGTTGCGGTTAAAAAGCTCGTAGTTTGACCTCTGCTCAGGTAGACTGGTCCGCCCTCTGGGTGAGCATCTGGCTTGGCCTGGGCATTTTCTTGGTGACCGCAGCTGCCCTTGACTGTGTGGTGCGGAATTCAGGACATTTACTTTGAGGAAATCAGAGTGTTTCAAGCAGGCATCTGCCTTGAATA	99.6	Gonyaulacales	Ceratiaceae	Ceratium	0	0	0	0	0	0	0	1.3	0	0	0	0	0	0.5	0	0	0	0	0	0	0	8.5	1
OTU_2306	AGCCGCGGTAATTCCAGCTCCAATAGCGTATATTAAAGTTGTTGCGGTTAAAAAGCTCGTAGTTTGACCTCTGCTCAGGTAGACTGGTCCGCCCTCTGGGTGAGCATCTGGCTTGGTCTGGGCATTTTCTTGGTGATCGCAGCTGCCCTTGACTGTGTGGTGCGGAATTCAGGACATTTACTTTGAGGAAATCAGAGTGTTTCAAGCAGGCATCTGCCTTGAATA	99.6	Gonyaulacales	Ceratiaceae	Ceratium	0	0	0	0	0	0	0	1.3	0	0	0	0	0	0	0	0	0	0	0	0.5	0	8.5	1
OTU_2314	AGCCGCGGTAATTCCAGCTCCAATAGCGTATATTAAAGTTGTTGCGGTTAAAAAGCTCGTAGTTTGACCTCTGCTCAGGTGGACTGGTCCGCCCTCTGGGTGAGCATCTGGCTTGGCCTGGGCATTTTCTTGGTGATCGCAGCTGCCCTTGACTGTGTGGTGCGGAATTCAGGACATTTACTTTGAGGAAATCAGAGTGTTTCAAGCAGGCATCTGCCTTGAATA	99.6	Gonyaulacales	Ceratiaceae	Ceratium	0	0	0	0	0	0	0	0	0	0	0	0	0	0	0.4	0	0	0	0	0	0	9.7	1
OTU_2307	AGCCGCGGTAATTCCAGCTCCAATAGCGTATATTAAAGTTGTTGCGGTTAAAAAGCTCGTAGTTTGACCTCTGCTCAGGTAGACTGGTCCGCCCCCTGGGTGAGCATCTGGCTTGGCCTGGGCATTTTCTTGGTGATCGCAGCTGCCCTTGACTGTGTGGTGCGGAATTCAGGACATTTACTTTGAGGAAATCAGAGTGTTTCAAGCAGGCATCTGCCTTGAATA	99.6	Gonyaulacales	Ceratiaceae	Ceratium	0	0	0	0	0	0	0	0	0	0	0	0.9	0	0.5	0	0	0	0	1.4	0	0	7.3	1
OTU_2640	AGCCGCGGTAATTCCAGCTCCAATAGCGTATATTAAAGTTGTTGCGGTTAAAAAGCTCGTAGTTTGACCTCTGCTCAGGTAGACTGGTCCGCCCTCTGGGTGAGCATCTGGCTTGGCCTGGGCATTTTCTTGGTGATCGCAGCTGCCCTTGACTGTGTGGTGCGGAATTCAGGACATTTACTTTGAGGAAATCAGAGTGGTTCAAGCAGGCATCTGCCTTGAATA	99.6	Gonyaulacales	Ceratiaceae	Ceratium	0	0	0	0	0	0	0	0	0	0	0	0	0	0	0	0	0	0	0	0	0	10.9	0
OTU_2361	AGCCGCGGTAATTCCAGCTCCAATAGCGTATATTAAAGTTGTTGCGGTTAAAAAGCTTGTAGTTTGACCTCTGCTCAGGTAGACTGGTCCGCCCTCTGGGTGAGCATCTGGCTTGGCCTGGGCATTTTCTTGGTGATCGCAGCTGCCCTTGACTGTGTGGTGCGGAATTCAGGACATTTACTTTGAGGAAATCAGAGTGTTTCAAGCAGGCATCTGCCTTGAATA	99.6	Gonyaulacales	Ceratiaceae	Ceratium	0	0	0	0	0	0.5	0	0	0	0	1.5	0	0	0	0	0	0	0	0	0.5	0	8.5	0
OTU_1949	AGCCGCGGTAATTCCAGCTCCAATAGCGTATATTAAAGTTGTTGCGGTTAAAAAGCTCGTAGTTGGATCCCTGCCGAGGACGACCGGTCTGCCCACTGGGTGTGTATCTGGCTCGGCCTGGGCATCTTCTTGGAGAACGTCTCTGCACTTGACTGTGTGGTGCGGTATCCAGGACTTTTACTTTGAGGAAATTAGAGTGTTTCAAGCAGGCACACGCCTTGAATA	99.6	Dinophyceae_X	Dinophyceae_XX	Dinophyceae_XXX	0	0	0.5	0	0	0.5	0	0	0	0	0	1.8	0.5	0	0	0	0	0	5.5	0.5	1.5	0	0
OTU_2039	AGCCGCGGTAATTCCAGCTCCAATAGCGTATATTAAAGTTGTTGCGGTTAAAAAGCTCGTAGTTTGACCTCTGCTCAGGTAGACTGGTCCGCCCTCTGGGTGAGCATCTGGCTTGGCCTGGGCATTTTCTTGGTGATCGCAGCTGCCCTTGACTGTGTGGTGCGGAATTCAGGACATTTACTTTGAGGAAATCAGAGTGTTTCAAGCAGGCATCTGCCTTGAACA	100	Gonyaulacales	Ceratiaceae	Ceratium	0	0	0	0	0	0	0	0	0	1.5	0	0	0	0	0.4	0	0	0	0	0.5	0	8.5	0
OTU_2130	AGCCGCGGTAATTCCAGCTCCAATAGCGTATATTAAAGTTGTTGCGGTTAAAAAGCTCGTAGTTTGACCTCTGCTCAGGTAGACTGGTCCGCCCTCTGGGTGAGCATCTGGCCTGGCCTGGGCATTTTCTTGGTGATCGCAGCTGCCCTTGACTGTGTGGTGCGGAATTCAGGACATTTACTTTGAGGAAATCAGAGTGTTTCAAGCAGGCATCTGCCTTGAATA	99.6	Gonyaulacales	Ceratiaceae	Ceratium	0	0	0	0	0	0	0	0	1.9	0	0	0	0	0.5	0.4	0.5	0	0	1.4	0	0	6	0
OTU_1855	AGCCGCGGTAATTCCAGCTCCAATAGCGTATATTAAAGTTGTTGCGGTTAAAAAGCTCGTAGTTTGACCTCTGCTCAGGTAGACTGGTCCGCCCTCTGGGTGAGCATCTGGTTTGGCCTGGGCATTTTCTTGGTGATCGCAGCTGCCCTTGACTGTGTGGTGCGGAATTCAGGACATTTACTTTGAGGAAATCAGAGTGTTTCAAGCAGGCATCTGCCTTGAATA	99.6	Gonyaulacales	Ceratiaceae	Ceratium	0	0	1	0	0	0	0	0	0	1.5	0	0	0	0.5	0	0	0.2	0	0	0	0	7.3	0
OTU_2644	AGCCGCGGTAATTCCAGCTCCAATAGCGTATATTAAAGTTGTTGCGGTTAAAAAGCTCGTAGTTTGACCTCTGCTCAGGTAGACTGGTCCGCCCTCTGGGTGAGCATCTGGCTTGGCCTGGGCATTTTCTTGGTGATCGCAGCTGCCCTTGACTGTGTGGTGCGGAATTCAGGACATTTACTTTGGGGAAATCAGAGTGTTTCAAGCAGGCATCTGCCTTGAATA	99.6	Gonyaulacales	Ceratiaceae	Ceratium	0	0	0	0	0	0	0	0	0	0	1.5	0	0.5	0	0	0	0	0	0	0	0	8.5	0
OTU_1067	AGCCGCGGTAATTCCAGCTCCAATAGCGTATATTAAAGTTGTTGCGGTTAAAAAGCTCGTAGTTGGATTTCTGCCGAGGACGACCGACCGACCCATACGGGTTTGTGTCTGGTTAGACCGAGGCATCCTCTTGGAAGACGTGATGTACTTCACTGTGCACACGGAGTCCAGGACTTTTACTTTGAGGAAATTAGAGTGTTTCAAACAGGCGTTCGCCGTGAATAC	96.9	Prorocentrales	Prorocentraceae	Prorocentrum	0	0	0	0	0	0	0	0	0	0	0	1.8	5.3	2.4	0.7	0	0	0	0	0	0	0	0
OTU_1822	AGCCGCGGTAATTCCAGCTCCAATAGCGTATATTAAAGTTGTTGCGGTTAAAAAGCTCGTAGTTGGATTTCTGTCGAAGGAGACCGGTCCGCCCTCTGGGTGAGTATCTGGATCTCTTTGGACATCTTCTTGGGGAACGTATCTGCACTTCATTGTGCGGTTCGGTACTCAAGACTTTTACTTTGAGGAAATTAGAGTGTTTCAAGCAGGCACACGCCTTGAATA	99.6	Peridiniales	Kryptoperidiniaceae	Unruhdinium	0	0	0	0	0	0	0	0	0	6	0	0.9	0.5	0	0	0	0	0	2.8	0	0	0	0
OTU_1335	AGCCGCGGTAATTCCAGCTCCAATAGCGTATATTAAAGTTGTTGCGGTTAAAAAGCTCGTAGTTGGATTTCTGCTGAGGATGACCGGTCCGCCCTCTGGGCAGGTATCTGGTTCAGCTTTGGCATCTTCTTGAAAAGTGTGTCTGCACTTGACTGTGTGGTGCAATATTCAAGACATTTACTTTGAGGAAATTAGAGTGTTTCAAGCAAGCGAGTGCTTTGAATA	98.2	Suessiales	Suessiaceae	Asulcocephalium	1.3	0	1	0	0	0	0	0	0	3	0	0.9	0.5	0	0	0.5	0	0	1.4	1.4	0	0	0
OTU_2347	AGCCGCGGTAATTCCAGCTCCAATAGCGTATATTAAAGTTGTTGCGGTTAAACAGCTCGTAGTTTGACCTCTGCTCAGGTAGACTGGTCCGCCCTCTGGGTGAGCATCTGGCTTGGCCTGGGCATTTTCTTGGTGATCGCAGCTGCCCTTGACTGTGTGGTGCGGAATTCAGGACATTTACTTTGAGGAAATCAGAGTGTTTCAAGCAGGCATCTGCCTTGAATA	99.6	Gonyaulacales	Ceratiaceae	Ceratium	0	0	0	0	0	0.9	0	1.3	0	0	0	0	0	0	0	0.5	0	0	0	0	0	7.3	0
OTU_2318	AGCCGCGGTAATTCCAGCTCCAATAGCGTATATTAAAGTTGTTGCGGTTAAAAAGCTCGTAGTTTGACCTCTGCTCAGGTAGGCTGGTCCGCCCTCTGGGTGAGCATCTGGCTTGGCCTGGGCATTTTCTTGGTGATCGCAGCTGCCCTTGACTGTGTGGTGCGGAATTCAGGACATTTACTTTGAGGAAATCAGAGTGTTTCAAGCAGGCATCTGCCTTGAATA	99.6	Gonyaulacales	Ceratiaceae	Ceratium	0	0	0	0	0	0.9	0	0	0	0	0	0	0	0.5	0	0	0	0	0	0	0	8.5	0
OTU_1756	AGCCGCGGTAATTCCAGCTCCAATAGCGTATATTAAAGTTGTTGCGGTTAAAAGGCTCGTAGTTGGATTTCTGTCGAAGGAGACCGGTCCGCCCTCTGGGTGAGTATCTGGATCTCTTTGGACATCTTCTTGGGGAACGTATCTGCACTTCATTGTGCGGTGCGGTACTCAAGACTTTTACTTTGAGGAAATTAGAGTGTTTCAAGCAGGCACACGCCTTGAATA	99.6	Peridiniales	Kryptoperidiniaceae	Unruhdinium	0	0	0	0	0	0	0	0	0	7.4	0	0.9	0	0	0	0	0	0	0	0	1.5	0	0
OTU_2625	AGCCGCGGTAATTCCAGCTCCAATAGCGTATATTAAAGTTGTTGCGGTTAAAAAGCTCGTAGTTTGACCTCTGCTCAGGTAGACTGGCCCGCCCTCTGGGTGAGCATCTGGCTTGGCCTGGGCATTTTCTTGGTGATCGCAGCTGCCCTTGACTGTGTGGTGCGGAATTCAGGACATTTACTTTGAGGAAATCAGAGTGTTTCAAGCAGGCATCTGCCTTGAATA	99.6	Gonyaulacales	Ceratiaceae	Ceratium	0	0	0	0	0	0.5	0	0	0	0	0	0.9	0	0	0	0	0	0	0	0	0	8.5	0
OTU_2029	AGCCGCGGTAATTCCAGCTCCAATAGCGTATATTAAAGTTGTTGCGGTTAAAAAGCTCGTAGTTTGACCTCTGCTCAGGTAGACTGGTCCGCCCTCTGGGTGAGCATCTGGCTTGGCCTGGGCATTTTCTTGGTGATCGCAGCTGCCCTTGACTGTGTGGTGCGGAATTCAGGACATTTACTTTGAGGAACTCAGAGTGTTTCAAGCAGGCATCTGCCTTGAATA	99.6	Gonyaulacales	Ceratiaceae	Ceratium	0	0	0.5	0	0	0.5	0	0	0	0	0	0	0	0	0.4	0	0	0	0	0	0	8.5	0
OTU_1750	AGCCGCGGTAATTCCAGCTCCAATAGCGTATATTAAAGTTGTCGCGGTTAAAAAGCTCGTAGTTTGACCTCTGCTCAGGTAGACTGGTCCGCCCTCTGGGTGAGCATCTGGCTTGGCCTGGGCATTTTCTTGGTGATCGCAGCTGCCCTTGACTGTGTGGTGCGGAATTCAGGACATTTACTTTGAGGAAATCAGAGTGTTTCAAGCAGGCATCTGCCTTGAATA	99.6	Gonyaulacales	Ceratiaceae	Ceratium	0	0	0	0	0	0.5	0	0	0	0	0	0	0.5	0	0.4	0	0.2	0	0	0	0	7.3	1
OTU_2028	AGCCGCGGTAATTCCAGCTCCAATAGCGTATATTAAAGTTGTTGCGGTTAAAAAGCTCGTAGTTTGACCTCTGCTCAGGTAGACTGGTCCGCCCTCTGGGTGAGCATCTGGCTTGGCCTGGGCATTTTCTTGGTGATCGCGGCTGCCCTTGACTGTGTGGTGCGGAATTCAGGACATTTACTTTGAGGAAATCAGAGTGTTTCAAGCAGGCATCTGCCTTGAATA	99.6	Gonyaulacales	Ceratiaceae	Ceratium	0	0	0.5	0	1.6	0	0	0	0	0	0	0.9	0	0.5	0.4	0.5	0	0	0	0.5	0	4.8	0
OTU_3090	AGCCGCGGTAATTCCAGCTCCAATAGCGTATATTAAAGTTGTTGCGGTTAAAAAGCTCGTAGTTTGACCTCTGCTCAGGTAGACTGGTCCGCCCTCTGGGTGAGCATCTGGCTTGGCCTGGGCATTTTCTTGGTGATCGCAGCTGCCCTTGACTGTGTGGTGCAGAATTCAGGACATTTACTTTGAGGAAATCAGAGTGTTTCAAGCAGGCATCTGCCTTGAATA	99.6	Gonyaulacales	Ceratiaceae	Ceratium	0	0	0	0	0	0	0	0	0	0	0	0	0	0	0	0	0	0	0	0	0	9.7	0
OTU_3118	AGCCGCGGTAATTCCAGCTCCAATAGCGTATATTAAAGTTGTTGCGGTTAAAAAGCTCGTAGTTTGACCTCTGCTCAGGTAGACTGGTCCGCCCTCTGGGTGAGCATCTGGCTTGGCCTGGGCATTTTCTTGGTGATCGCAGCTGCCCTTGACTGTGTGGTGCGGAATTCAGGACATTTACTTTGAGGAAATCAGAGTGTTTCAAGCAGGCATCTGCCTGGAATA	99.6	Gonyaulacales	Ceratiaceae	Ceratium	0	0	0	0	0	0	0	0	0	0	0	0	0	0	0	0	0	0	0	0	0	9.7	0
OTU_3119	AGCCGCGGTAATTCCAGCTCCAATAGCGCATATTAAAGTTGTTGCGGTTAAAAAGCTCGTAGTTTGACCTCTGCTCAGGTAGACTGGTCCGCCCTCTGGGTGAGCATCTGGCTTGGCCTGGGCATTTTCTTGGTGATCGCAGCTGCCCTTGACTGTGTGGTGCGGAATTCAGGACATTTACTTTGAGGAAATCAGAGTGTTTCAAGCAGGCATCTGCCTTGAATA	99.6	Gonyaulacales	Ceratiaceae	Ceratium	0	0	0	0	0	0	0	0	0	0	1.5	0	0	0	0	0	0.2	0	0	0	0	6	1.9
OTU_2089	AGCCGCGGTAATTCCAGCTCCAATAGCGTATATTAAAGTTGTTGCGGTTAAAAAGCTCGTAGTTGGATTTCTGCCGAGGACGACCGGTCCGCCCACTGGGTGTGCATCTGGCTCGGCCTGGGCATCTTCTTGGAGAACGTATCTGCACTTCATTGTGTGGTGCGGTATCCAGGACTTTTACTTTGAGGAAATTAGAGTGTTTCAAGCAGGCACACGCCTTGAATA	100	Peridiniales	Thoracosphaeraceae	Thoracosphaeraceae_X	4	0	0	2	0	0	0	0	0	0	0	0	0	0	0	0	0	3.6	0	0	0	0	0
OTU_2636	AGCCGCGGTAATTCCAGCTCCAATAGCGTATATTAAAGTTGTTGCGGTTAAAAAGCTCGTAGTTTGACCTCTGCTCAGGTAGACTGGTCCGCCCTCTGGGTGAGCATCTGGCTTGGCCTGGGCATTTTCTTGGTGATCGCAGCTGCCCTTGACTGTGTGGTGCGGAATTCAGGGCATTTACTTTGAGGAAATCAGAGTGTTTCAAGCAGGCATCTGCCTTGAATA	99.6	Gonyaulacales	Ceratiaceae	Ceratium	0	0	0	0	0	0.9	0	0	0	0	1.5	0	0	0	0	0	0	0	0	0	0	7.3	0
OTU_2642	AGCCGCGGTAATTCCAGCTCCAATAGCGTATATTAAAGTTGTTGCGGTTAAAAAGCTCGTAGTTTGACCTCTGCTCAGGTAGACTGGTCCGCCCTCTGGGTGAGCATCTGGCTTGGCCTGGGCATTTTCTTGGTGATCGCAGCTGCCCTCGACTGTGTGGTGCGGAATTCAGGACATTTACTTTGAGGAAATCAGAGTGTTTCAAGCAGGCATCTGCCTTGAATA	99.6	Gonyaulacales	Ceratiaceae	Ceratium	0	0	0	0	0	0.5	0	0	0	0	0	0	0	0	0	0	0	0	0	0	0	7.3	1.9
OTU_3103	AGCCGCGGTAATTCCAGCTCCAATAGCGTATATTAAAGTTGTTGCGGTTAAAAAGCTCGTAGTTTGACCTCTGCTCAGGTAGACTGGTCCGCCCTCTGGGTGAGCATCTGGCTTGGCCTGGGCATTTTCTTGGTGATCGCAGCTGCCCTTGACTGTGTGGTGCGGAATTCAAGACATTTACTTTGAGGAAATCAGAGTGTTTCAAGCAGGCATCTGCCTTGAATA	99.6	Gonyaulacales	Ceratiaceae	Ceratium	0	0	0	0	1.6	0	0	0	0	0.7	0	0	0	0	0	0	0	0	0	0	0	7.3	0
OTU_2312	AGCCGCGGTAATTCCAGCTCCAATAGCGTATATTAAAGTTGTTGCGGTTAAAAAGCTCGTAGTTTGACCTCTGCTCAGGTAGACTGGTCCGCCCTCTGGGTGAGCATCTGGCTTGGCCTGGGCATTTTCTTGGTGATCGCAGCTGCTCTTGACTGTGTGGTGCGGAATTCAGGACATTTACTTTGAGGAAATCAGAGTGTTTCAAGCAGGCATCTGCCTTGAATA	99.6	Gonyaulacales	Ceratiaceae	Ceratium	0	0	0.5	0	0	0.5	0	0	0	0	0	0	0	0	0.4	0	0	0	0	0	0	7.3	1
OTU_2645	AGCCGCGGTAATTCCAGCTCCAATAGCGTATATTAAAGTTGTTGCGGTTAAAAAGCTCGTAGTTTGACCTCTGCTCAGGTAGACTGGTCCGCCCTCTGGGTGAGCATCTGGCTTGACCTGGGCATTTTCTTGGTGATCGCAGCTGCCCTTGACTGTGTGGTGCGGAATTCAGGACATTTACTTTGAGGAAATCAGAGTGTTTCAAGCAGGCATCTGCCTTGAATA	99.6	Gonyaulacales	Ceratiaceae	Ceratium	0	0	0.5	0	0	0	0	0	0	0	1.5	0.9	0	0.5	0	0	0	0	0	0	0	6	0
OTU_2639	AGCCGCGGTAATTCCAGCTCCAATAGCGTATATTAAGGTTGTTGCGGTTAAAAAGCTCGTAGTTTGACCTCTGCTCAGGTAGACTGGTCCGCCCTCTGGGTGAGCATCTGGCTTGGCCTGGGCATTTTCTTGGTGATCGCAGCTGCCCTTGACTGTGTGGTGCGGAATTCAGGACATTTACTTTGAGGAAATCAGAGTGTTTCAAGCAGGCATCTGCCTTGAATA	99.6	Gonyaulacales	Ceratiaceae	Ceratium	0	0	0	0	0	0	0	0	0	0	0	0	0.5	0	0	0	0.2	0	1.4	0	0	7.3	0
OTU_2031	AGCCGCGGTAATTCCAGCTCCAATAGCGTATATTAAAGTTGTTGCGGTTAAAAAGCTCGTAGTTTGACCTCTGCTCGGGTAGACTGGTCCGCCCTCTGGGTGAGCATCTGGCTTGGCCTGGGCATTTTCTTGGTGATCGCAGCTGCCCTTGACTGTGTGGTGCGGAATTCAGGACATTTACTTTGAGGAAATCAGAGTGTTTCAAGCAGGCATCTGCCTTGAATA	99.6	Gonyaulacales	Ceratiaceae	Ceratium	0	0	0	0	0	0	0	0	0	0	0	0	1.1	0.5	0	0.5	0.2	0	0	0	0	6	1
OTU_1017	AGCCGCGGTAATTCCAGCTCCAATAGCGTATATTAAAGTTGTTGCGGTTAAAAAGCTCGTAGTTGGATTTCTGCCGAGGACGACCGGTCCGCCCACTGGGTGTGCATCTGGTTCGGCCTGGGCATCTTCTTGGAGAACGTATTTGCACTTTACTGTGTGGTGCGGTATCCAGGACTTTTACTTTGAGGAAATTAGAGTGTTTCAAGCAGGCACACGCCTTGAATA	99.1	Peridiniales	Thoracosphaeraceae	Thoracosphaeraceae_X	0	0	0	0	0	0	0	0	0	0	0	0	0	0	2.9	0	0	0	0	5.1	0	1.2	0
OTU_3162	AGCCGCGGTAATTCCAGCTCCAATAGCGTATATTAAAGTTGTTGCGGTTAAAAAGCTCGTAGTTTGACCTCTGCTCAGGTAGACTGGTCCGCCTTCTGGGTGAGCATCTGGCTTGGCCTGGGCATTTTCTTGGTGATCGCAGCTGCCCTTGACTGTGTGGTGCGGAATTCAGGACATTTACTTTGAGGAAATCAGAGTGTTTCAAGCAGGCATCTGCCTTGAATA	99.6	Gonyaulacales	Ceratiaceae	Ceratium	0	0	0	0	3.3	0	0	0	0	0.7	0	0	0	0	0.4	0	0	0	0	0	0	4.8	0
OTU_2638	AGCCGCGGTAATTCCAGCTCCAATAGCGTATATTAAAGTTGTTGCGGTTAAAAAGCTCGTAGTTTGACCTCTGCTCAGGTAGACTGGTCCGCCCTCTGGGTGAGCATCTGGCTTGGCCTGGGCATTTTCTTGGTGATCGCAGCTGCCCTTGACTGTGTGTTGCGGAATTCAGGACATTTACTTTGAGGAAATCAGAGTGTTTCAAGCAGGCATCTGCCTTGAATA	99.6	Gonyaulacales	Ceratiaceae	Ceratium	0	0	0	0	0	0	0	0	0	0	0	0.9	0.5	0.5	0	0	0	0	0	0	0	7.3	0
OTU_2518	AGCCGCGGTAATTCCAGCTCCAATAGCGTATATTAAAGTTGTTGCGGTTAAAAAGCTCGTAGTTTGACCTCTGCTCAGGTAGACTGGTCCGCCCTCTGGGTGAGCATCTGGCTTGGCCTGGGCATTTTCTTGGTGATCGCAGCTGCCCTTGACTGGGTGGTGCGGAATTCAGGACATTTACTTTGAGGAAATCAGAGTGTTTCAAGCAGGCATCTGCCTTGAATA	99.6	Gonyaulacales	Ceratiaceae	Ceratium	0	0	0	0	0	0	0.5	0	0	0	0	0.9	0	0	0.4	0	0	0	0	0	0	7.3	0
OTU_2206	AGCCGCGGTAATTCCAGCTCCAATAGCGTATATTAAAGTTGTTGCGGTTAAAAAGCTCGTAGTTGGATTTCTGCCGAGGACGACCGACCGACCCAAACGGGTTTGTGTCTGGTTAGACCGAGGCATCCTCTTGGAAGACGTGTTCCACTTAACTGTGGTCACGGAGTCCAGGACTTTTACTTTGAGGAAATTAGAGTGTTTCAAACAGGCGTTCGCCGTGAATAC	99.1	Prorocentrales	Prorocentraceae	Prorocentrum	0	0	0	0	1.6	0	0	0	0	0	0	6.3	1.1	0	0	0	0	0	0	0	0	0	0
OTU_3102	AGCCGCGGTAATTCCAGCTCCAATAGCGTATATTAAAGTTGTTGCGGTTAAAAAGCCCGTAGTTTGACCTCTGCTCAGGTAGACTGGTCCGCCCTCTGGGTGAGCATCTGGCTTGGCCTGGGCATTTTCTTGGTGATCGCAGCTGCCCTTGACTGTGTGGTGCGGAATTCAGGACATTTACTTTGAGGAAATCAGAGTGTTTCAAGCAGGCATCTGCCTTGAATA	99.6	Gonyaulacales	Ceratiaceae	Ceratium	0	0	0.5	0	0	0	0	0	0	0	0	0	0	0	0	0	0	0	0	0	0	8.5	0
OTU_3106	AGCCGCGGTAATTCCAGCTCCAATAGCGTATATTAAAGTTGTTGCGGTTAAAAAGCTCGTAGTTTGACCTCTGCTCAGGTAGACTGGTCCACCCTCTGGGTGAGCATCTGGCTTGGCCTGGGCATTTTCTTGGTGATCGCAGCTGCCCTTGACTGTGTGGTGCGGAATTCAGGACATTTACTTTGAGGAAATCAGAGTGTTTCAAGCAGGCATCTGCCTTGAATA	99.6	Gonyaulacales	Ceratiaceae	Ceratium	0	0	0.5	0	0	0	0	0	0	0	0	0	0	0	0	0	0	0	0	0	0	8.5	0
OTU_3108	AGCCGCGGTAATTCCAGCTCCAATAGCGTATATTAAAGTTGTTGCGGTTAAAAAGCTCGTAGTTTGACCTCTGCTCAGGTAGACTGGTCCGCCCTCTGGGTGAGCATCTGGCTTGGCCTGGGCATTTTCTTGGTGATCGCAGCTGTCCTTGACTGTGTGGTGCGGAATTCAGGACATTTACTTTGAGGAAATCAGAGTGTTTCAAGCAGGCATCTGCCTTGAATA	99.6	Gonyaulacales	Ceratiaceae	Ceratium	0	0	0	0	0	0	0	0	0	0	0	0	0	0.5	0	0	0	0	0	0	0	8.5	0
OTU_3110	AGCCGCGGTAATTCCAGCTCCAATAGCGTATATTAAAGTTGTTGCGGTTAAAAAGTTCGTAGTTTGACCTCTGCTCAGGTAGACTGGTCCGCCCTCTGGGTGAGCATCTGGCTTGGCCTGGGCATTTTCTTGGTGATCGCAGCTGCCCTTGACTGTGTGGTGCGGAATTCAGGACATTTACTTTGAGGAAATCAGAGTGTTTCAAGCAGGCATCTGCCTTGAATA	99.6	Gonyaulacales	Ceratiaceae	Ceratium	0	0	0	0	0	0.5	0	0	0	0	0	0	0	0	0	0	0	0	0	0	0	8.5	0
OTU_2310	AGCCGCGGTAATTCCAGCTCCAATAGCGTATATTAAAGTTGTTGCGGTTAAAAAGCTCGTAGTTTGACCTCTGCTCAGGTAGACTGGTCCGCCCTCTGGGTGAGCATCTGGCTTGGCCTGGTCATTCTTGGTGATCGCAGCTGCCCTTGACTGTGTGGTGCGGAATTCAGGACATTTACTTTGAGGAAATCAGAGTGTTTCAAGCAGGCATCTGCCTTGAATAAC	99.6	Gonyaulacales	Ceratiaceae	Ceratium	0	0	1	0	0	0	0	0	0	0.7	0	0.9	0	0	0	0	0.2	0	1.4	0	0	3.6	1
OTU_2313	AGCCGCGGTAATTCCAGCTCCAATAGCGTATATTAAAGTTGTTGCGGTTAAAAAGCTCGTAGTTTGACCTCTGCTCAGGTAGACTGGTCCGCCCTCTGGGTGAGCATCTGGCTTGGCCTGGGCATTTTTTTGGTGATCGCAGCTGCCCTTGACTGTGTGGTGCGGAATTCAGGACATTTACTTTGAGGAAATCAGAGTGTTTCAAGCAGGCATCTGCCTTGAATA	99.6	Gonyaulacales	Ceratiaceae	Ceratium	0	0	0	0	0	0	0	0	0	0	0	0	1.6	0	0	0	0	0	0	0	0	7.3	0
OTU_3120	AGCCGCGGTAATTCCAGCTCCAATAGCGTATATTAAAGTTGTTGCGGTTAAAAAGCTCGTAGTTTGACCTCTGCTCAGGTAGACTGGTCCGCCCTCTGGGTGAGCATCTGGCTTGGCCTGGGCATTTTCTTGGTTATCGCAGCTGCCCTTGACTGTGTGGTGCGGAATTCAGGACATTTACTTTGAGGAAATCAGAGTGTTTCAAGCAGGCATCTGCCTTGAATA	99.6	Gonyaulacales	Ceratiaceae	Ceratium	0	0	0	0	0	0	0	0	0	0	0	0	0	0	0.4	0	0	0	0	0	0	8.5	0
OTU_3111	AGCCGCGGTAATTCCAGCTCCAATAGCGTATATTAAAGTTGTTGCGGTTAAAAAGCTCGTAGTTTGACCTCTGCTCAGGTAGACTGGTCCGCCCTCTGGGTGAGCATCTGGCTTGGCCTGGGCATTTTCTTGGTGATCGCAGCTGCCCTTTACTGTGTGGTGCGGAATTCAGGACATTTACTTTGAGGAAATCAGAGTGTTTCAAGCAGGCATCTGCCTTGAATA	99.6	Gonyaulacales	Ceratiaceae	Ceratium	0	0	0	0	0	0	0	0	0	0	0	0	0	0	0.4	0	0	0	0	0	0	8.5	0
OTU_2643	AGCCGCGGTAATTCCAGCTCCAATAGCGTATATTAAAGTTGTTGCGGTTAAAAAGCTCGTAGTTTGACCTCTGCTCAGGTAGACTGGTCCGCCCTCTGGGTGAGCATCTGGCTTGGCCTGGGCATTTTCTTGGTGATCGCAGCTGCCCTTGACTGTGCGGTGCGGAATTCAGGACATTTACTTTGAGGAAATCAGAGTGTTTCAAGCAGGCATCTGCCTTGAATA	99.6	Gonyaulacales	Ceratiaceae	Ceratium	0	0	0	0	0	0.5	0	0	0	0	0	0	0	0.5	0	0.5	0	0	0	0	0	7.3	0
OTU_3647	AGCCGCGGTAATTCCAGCTCCAATAGCGTATATTAAAGTTGTTGCGGTTAAAAAGCTCGTAGTTTGACCTCTGCTCAGGTAGACTGGTCCGCCCTCTGGGTGAGCATCTGGCTTGGCCTGGGCATTTTCTTGGTGATCGCAGCTGCCCTTGACTGTGTGGTGCGGAATTCAGGACATTTACTTTGAGGAAATCAGAGTGTTTCAAGCAGGCCTCTGCCTTGAATA	99.6	Gonyaulacales	Ceratiaceae	Ceratium	0	0	0	0	0	0	0	0	0	0	0	0	0	0	0	0	0	0	1.4	0	0	7.3	0
OTU_3096	AGCCGCGGTAATTCCAGCTCCAATAGCGTATATTAAAGTTGTTGCGGTTAAAAAGCTCGTAGTTTGACCTCTGCTCAGGTAGACTGGTCCGCCCTCTGGGTGAGCATCTGGCTTGGCCTGGGCATTTTCTTGGTGATCGCAGTTGCCCTTGACTGTGTGGTGCGGAATTCAGGACATTTACTTTGAGGAAATCAGAGTGTTTCAAGCAGGCATCTGCCTTGAATA	99.6	Gonyaulacales	Ceratiaceae	Ceratium	0	0	0	0	0	0	0	1.3	0	0.7	0	0	0	0	0	0	0	0	0	0.5	0	6	0
OTU_3695	AGCCGCGGTAATTCCAGCTCCAATAGCGTATATTAAAGTTGTTGCGGTTAAAAAGCTCGTAGTTTGACCTCTGCTCAGGTAGACTGGTCCGCCCTCTGGGTGAGCATCTGGCTTGGCCTGGGCATTTTCTTGGTGATCGCAGCTGCCTTTGACTGTGTGGTGCGGAATTCAGGACATTTACTTTGAGGAAATCAGAGTGTTTCAAGCAGGCATCTGCCTTGAATA	99.6	Gonyaulacales	Ceratiaceae	Ceratium	0	0	0	0	1.6	0	0	0	0	0	0	0.9	0	0	0	0	0	0	0	0	0	6	0
OTU_2472	AGCCGCGGTAATTCCAGCTCCAATAGCATATATTAAAGTTGTTGCGGTTAAAAAGCTCGTAGTTTGACCTCTGCTCAGGTAGACTGGTCCGCCCTCTGGGTGAGCATCTGGCTTGGCCTGGGCATTTTCTTGGTGATCGCAGCTGCCCTTGACTGTGTGGTGCGGAATTCAGGACATTTACTTTGAGGAAATCAGAGTGTTTCAAGCAGGCATCTGCCTTGAATA	99.6	Gonyaulacales	Ceratiaceae	Ceratium	0	0	0.5	0	0	0.5	0	0	0	0.7	0	0	0	0.5	0	0	0	0	0	0	1.5	4.8	0
OTU_3190	AGCCGCGGTAATTCCAGCTCCAATAGCGTATATTAAAGTTGTTGCGGTTAAAAAGCTCGTAGTTGGATTTCTGCCGAGGACGACCGACCGATCCGTATGGGTTTGCGTCTGGTTAGACCGAGGCATCCTCTTGGAAGACGTGATCCGATTCATTTCGGACACGGAGTCCAGGACATTTACTTTGAGGAAATTAGAGTGTTTCAAACAGGCGTTTGCCGTGAATAC	95.6	Prorocentrales	Prorocentraceae	Prorocentrum	0	0	0	0	0	0	0	0	0	3	0	0	0	0.5	0	0	0	3.6	1.4	0	0	0	0
OTU_3692	AGCCGCGGTAATTCCAGCTCCAATAGCGTATATTAAAGTTGTTGCGGTTAAAAAGCTCGTAGTTTGACCTCTGCTCAGGTAGACTGGTCCGCCCTCTGGGTGAGCATCTGGCTTGGCCTGGGCATTTTCTTGGTGATCGCAGCTGCCCTTGACTGTGTGGTGCGGAATTCAGTACATTTACTTTGAGGAAATCAGAGTGTTTCAAGCAGGCATCTGCCTTGAATA	99.6	Gonyaulacales	Ceratiaceae	Ceratium	0	0	0	0	0	0	0	0	0	0	0	0	0	0	0	0	0	0	0	0	0	8.5	0
OTU_3688	AGCCGCGGTAATTCCAGCTCCAATAGCGTATATTAAAGTTGTTGCGGTTAAAAAGCTCGTAGTTTGACCTCTGCTCAGGTAGACTGGTCCGCCCTCTGGGTGAGCATCTGGCTTGGCCTGGGCATTTTCTTGGTGATCGCAGCTGCCCTTGCCTGTGTGGTGCGGAATTCAGGACATTTACTTTGAGGAAATCAGAGTGTTTCAAGCAGGCATCTGCCTTGAATA	99.6	Gonyaulacales	Ceratiaceae	Ceratium	0	0	0	0	0	0	0	0	0	0	0	0	0	0	0	0	0	0	0	0	0	8.5	0
OTU_2630	AGCCGCGGTAATTCCAGCTCCAATAGCGTATATTAAAGTTGTTGCGGTTTAAAAGCTCGTAGTTTGACCTCTGCTCAGGTAGACTGGTCCGCCCTCTGGGTGAGCATCTGGCTTGGCCTGGGCATTTTCTTGGTGATCGCAGCTGCCCTTGACTGTGTGGTGCGGAATTCAGGACATTTACTTTGAGGAAATCAGAGTGTTTCAAGCAGGCATCTGCCTTGAATA	99.6	Gonyaulacales	Ceratiaceae	Ceratium	0	0	0	0	0	0	0	0	0	0	0	0	0	0.5	0	0	0.2	0	0	0.5	0	7.3	0
OTU_3715	AGCCGCGGTAATTCCAGCTCCAATAGCGTATATTAAAGTTGTTGCGGTTAAAAAGCTCGTAGTTTGACCTCTGCTCAGGTAGACTGGTCCGCCCTCTGGGTGAGCATCTGGCTTGGCCTGGGCATTTTCTTGGTGATCGCAGCTGCCCTTGACTGTGTGGTGCGGAATTCAGGACATTTACTTTGAGGAAATCAGAGTGTTTCAAGCAGGCATCTGCTTTGAATA	99.6	Gonyaulacales	Ceratiaceae	Ceratium	0	0	0	0	0	0	0	1.3	0	0	0	0	0	0	0	0	0	0	0	0	0	6	1
OTU_2416	AGCCGCGGTAATTCCAGCTCCAATAGCGTATATTAAAGTTGTTGCGGTTAAAAAGCTCGTAGTTTGACCTCTGCTCAGGTAGACTGGTCTGCCCTCTGGGTGAGCATCTGGCTTGGCCTGGGCATTTTCTTGGTGATCGCAGCTGCCCTTGACTGTGTGGTGCGGAATTCAGGACATTTACTTTGAGGAAATCAGAGTGTTTCAAGCAGGCATCTGCCTTGAATA	99.6	Gonyaulacales	Ceratiaceae	Ceratium	0	0	0.5	0	0	0.9	0	0	1.9	0	0	0.9	0	0	0.4	0	0	0	0	0	0	3.6	0
OTU_2515	AGCCGCGGTAATTCCAGCTCCAATAGCGTATATTAAAGTTGTTGCGGTTAAAAAGCTCGTAGTTTGACCTCTGCTCAGGTAGACTGGTCCGCCCTCTGGGTGAGCATCTGGCTTGGCCTGGGCATTTTCTTGGTGATCGCAGCTGCCCTTGACTGTGTGGTGCGGTATTCAGGACATTTACTTTGAGGAAATCAGAGTGTTTCAAGCAGGCATCTGCCTTGAATA	99.6	Gonyaulacales	Ceratiaceae	Ceratium	0	0	0.5	0	0	0	0	0	0	0.7	0	0	0.5	0	0.4	0	0	0	0	0	0	6	0
OTU_3075	AGCCGCGGTAATTCCAGCTCCAATAGCGTATATTAAAGTTGTTGCGGTTAAAAAGCTCGTAGTTGGATTTCTGCCGAGGACGACCGGTCCGCCCTCTGGGTGTGCATCTGGCTCGGCCTGGGCATCTTCTTGGAGAACGTATCTGCACTTCATTGTGTGGTTCGGTATCCAGGACCTTTACTTTGAGGAAATTAGAGTGTTTCAAGCAGGCACACGCCTTGAATA	98.7	Peridiniales	Thoracosphaeraceae	Thoracosphaeraceae_X	0	0	0	0	0	0	0	0	0	0	0	0	0	0	0.4	0	0	0	6.9	0.9	0	0	0
OTU_3109	AGCCGCGGTAATTCCAGCTCCAATAGCGTATATTAAAGTTGTTGCGGTTAAAAAGCTCGTAGTTTGACCTCTGCTCAGGTAGACTGGTCCGCCCTCTGGGTGAGCATCTGGCTTGGCCTGGGCATTGTCTTGGTGATCGCAGCTGCCCTTGACTGTGTGGTGCGGAATTCAGGACATTTACTTTGAGGAAATCAGAGTGTTTCAAGCAGGCATCTGCCTTGAATA	99.6	Gonyaulacales	Ceratiaceae	Ceratium	0	0	0	0	1.6	0.5	0	0	0	0.7	0	0	0	0	0	0.5	0	0	0	0	0	4.8	0
OTU_3202	AGCCGCGGTAATTCCAGCTCCAATAGCGTATATTAAAGTTGTTGCGGTTAAAAAGCTCGTAGTTGGATTTCTGTCGAAGGAGACCGGTCCGCCCTCTGGGTGAGTATCTGGATCTCTTTGGACATCTTCTTGGGGAACGTACCTGCACTTCATTGTGCGGTGCGGTACTCAAGACTTTTACTTTGAGGAAATTAGAGTGTTTCAAGCAGGCACACGCCTTGAATA	99.6	Peridiniales	Kryptoperidiniaceae	Unruhdinium	0	0	0	0	0	0	0	0	0	2.2	1.5	0	0.5	0	0	0	0.2	3.6	0	0	0	0	0
OTU_3708	AACCGCGGTAATTCCAGCTCCAATAGCGTATATTAAAGTTGTTGCGGTTAAAAAGCTCGTAGTTTGACCTCTGCTCAGGTAGACTGGTCCGCCCTCTGGGTGAGCATCTGGCTTGGCCTGGGCATTTTCTTGGTGATCGCAGCTGCCCTTGACTGTGTGGTGCGGAATTCAGGACATTTACTTTGAGGAAATCAGAGTGTTTCAAGCAGGCATCTGCCTTGAATA	100	Gonyaulacales	Ceratiaceae	Ceratium	0	0	0	0	0	0	0	0	0	0	1.5	0	0	0	0.4	0	0	0	1.4	0	0	4.8	0
OTU_3013	AGCCGCGGTAATTCCAGCTCCAATAGCGTATATTAAAGTTGTTGCGGTTAAAAAGCTCGTAGTTTGACCTCTGCTCAGGTAGACTGGTCCGCCCTCTGGGTGAGCATCTGGCTTGGCCTGGGCATTTTCTTGGTGATCGCCGCTGCCCTTGACTGTGTGGTGCGGAATTCAGGACATTTACTTTGAGGAAATCAGAGTGTTTCAAGCAGGCATCTGCCTTGAATA	99.6	Gonyaulacales	Ceratiaceae	Ceratium	0	0	1.6	0	0	0	0	0	0	0	0	0	0	0	0.4	0	0	0	0	0	0	6	0
OTU_3716	AGCCGCGGTAATTCCAGCTCCAATAGCGTATATTAAAGTTGTTGCGGTTAAAAAGCTCGTAGTTTGACCTCTGCTCAGGTAGACTGGTCCGCCCTCTGGGTGAGCATCTGGCTTGGCCTGGGCATTTTCTTGGTGATCGCAGCTGCCCTTGACTGTGTGGTGCGGAATTCAGGACATTTACTGTGAGGAAATCAGAGTGTTTCAAGCAGGCATCTGCCTTGAATA	99.6	Gonyaulacales	Ceratiaceae	Ceratium	0	0	0	0	0	0	0	0	0	0	0	0	0	0	0	0	0	0	0	0	0	6	1.9
OTU_3707	AGCCGCGGTAATTCCAGCTCCAATAGCGTATATTAAAGTTGTTGCGGTTAAAAAGCTCGTAGTTTGACCTCTGCTCAGGTAGACTGGTCCGCCCTCTGGGTGAGCATCTGGCTTGGCCTGGGCATTTTCTTGGTGATCGCAGCTGCCCTTGACTGTGTGGTGCGGAATTCAGGACATTTACTTTAAGGAAATCAGAGTGTTTCAAGCAGGCATCTGCCTTGAATA	99.6	Gonyaulacales	Ceratiaceae	Ceratium	0	0	0	0	0	0	0	0	0	0	0	0	0	0	0	0	0	0	0	0	0	6	1.9
OTU_3099	AGCCGCGGTAATTCCAGCTCCAATAGCGTATATTAAAGTTGTTGCGGTTAAAAAGCTCGTAGTTTGACCTCTGCTCAGGTAGACTGGTCCGCCCTCTGGGTGAGCATCTGGCTTGGCCTGGGCATTTTCTTGGTGATCGCAGCTGCCCTTGACTGTGTGGTGCGGAGTTCAGGACATTTACTTTGAGGAAATCAGAGTGTTTCAAGCAGGCATCTGCCTTGAATA	99.6	Gonyaulacales	Ceratiaceae	Ceratium	0	0	0	0	0	0.5	0	0	0	0	0	0	0	0	0	0	0	0	0	0.5	0	6	1
OTU_5498	AGCCGCGGTAATTCCAGCTCCAATAGCGTATATTAAAGTTGTTGCGGTTAAAAAGCTCGTAGTTGGATTTCTGCTTAGGTAGACTGGTCCGCCCTCTGGGTGAGCATCTGGCTTGGCCTGGGCATTTTCTTGGTGATCGCAGCTGCCCTTGACTGTGTGGTGTGGAACTCAGGACTTTTACTCTGAGGAAATCAGAGTGCTTCAAGCAGGTATCTGCCTTGAATA	98.2	Gonyaulacales	Ceratiaceae	Ceratium	0	0	0	0	6.5	0	0	0	0	0	0	0	0	0	0	0	0	0	1.4	0	0	0	0
OTU_2626	AGCCGCGGTAATTCCAGCTCCAATAGCGTATATTAAAGTTGTTGCGGTTAAAAAGCTCGTAGTTTGACCCCTGCTCAGGTAGACTGGTCCGCCCTCTGGGTGAGCATCTGGCTTGGCCTGGGCATTTTCTTGGTGATCGCAGCTGCCCTTGACTGTGTGGTGCGGAATTCAGGACATTTACTTTGAGGAAATCAGAGTGTTTCAAGCAGGCATCTGCCTTGAATA	99.6	Gonyaulacales	Ceratiaceae	Ceratium	0	0	0.5	0	0	0	0	0	0	0	0	0	0	0.5	0.4	0	0	0	0	0.5	0	6	0
OTU_4451	AGCCGCGGTAATTCCAGCTCCAATAGCGTATATTAAAGTTGTTGCGGTTAAAAAGCTCGTAGTTTGACCTCTGCTCAGGTAGACTGGTCCGCCCTCTGGGTGAGCATCTGGCTTGGCCTGGGCATTTTCTTGGTGATCGCAGCTGCCCCTGACTGTGTGGTGCGGAATTCAGGACATTTACTTTGAGGAAATCAGAGTGTTTCAAGCAGGCATCTGCCTTGAATA	99.6	Gonyaulacales	Ceratiaceae	Ceratium	0	0	0	0	1.6	0	0	0	0	0	0	0	0	0	0	0	0	0	1.4	0	0	4.8	0
OTU_3117	AGCCGCGGTAATTCCAGCTCCAATAGCGTATATTAAAGTTGTTGCGGTTAAAAAGCTCGTAGTTTGACCTCTGCTCAGGTAGACTGGTCCGCCCTCTGGGTGAGCATCTGGCTTGGCCTGGGCATTTTCTTGGTGATCGCAGCTGCCCTTGACTGTGTGGTGCGGAATTCAGGACATTTACTTTGAGGAAATCAGAGTGTTTCAAGCAGGCACCTGCCTTGAATA	99.6	Gonyaulacales	Ceratiaceae	Ceratium	0	0	0	0	0	0	0	0	0	0	0	0	0	0.5	0.4	0	0	0	0	0	0	6	1
OTU_3698	AGCCGCGGTAATTCCAGCTCCAATAGCGTATATTAAAGTTGTTGCGGTTAAAAAGCTCGTAGTTTGACCTCTGCTCAGGTAGACTGGTCCGCCCTCTGGGTGAGCACCTGGCTTGGCCTGGGCATTTTCTTGGTGATCGCAGCTGCCCTTGACTGTGTGGTGCGGAATTCAGGACATTTACTTTGAGGAAATCAGAGTGTTTCAAGCAGGCATCTGCCTTGAATA	99.6	Gonyaulacales	Ceratiaceae	Ceratium	0	0	0.5	0	0	0	0	0	0	0	0	0	0	0	0	0	0	0	0	0	0	7.3	0
OTU_3727	AGCCGCGGTAATTCCAGCTCCAATAGCGTATATTAAAGTTGTTGCGGTTAAAAAGCTCGTAGTTTGACCTCTGCTCAGGTAGACTGGTCCGCCCTCTGGGTGAGCATCCGGCTTGGCCTGGGCATTTTCTTGGTGATCGCAGCTGCCCTTGACTGTGTGGTGCGGAATTCAGGACATTTACTTTGAGGAAATCAGAGTGTTTCAAGCAGGCATCTGCCTTGAATA	99.6	Gonyaulacales	Ceratiaceae	Ceratium	0	0	0	0	0	0	0	1.3	0	0	0	0	0	0	0	0	0	0	0	0.5	0	4.8	1
OTU_2341	AGCCGCGGTAATTCCAGCTCCAATAGCGTATATTAAAGTTGTTGCGGTTAAAAAGCTCGTAGTTGGATTTCTGCTGAGGATGACCGGTCCGCCCTGTGGGTGTGCATCTGGCTCAGCCTTGGCATCTTCCTGAAGAACGTAGCTGCACTTGACTGTGTGGTGCGGTATTTAGGACATTTACTTTGAGGAAATTAGAGTGTTTCAAGCAAGCGCACGCTTTGAATA	100	Suessiales	Suessiaceae	Biecheleria	0	0	0	0	0	0.9	0	0	0	0.7	0	0	0	0.5	0.4	0.5	0	0	0	0	0	3.6	1
OTU_1783	AGCCGCGGTAATTCCAGCTCCAATAGCGTATATTAAAGTTGTTGCGGTTAAAAAGCTCGTAGTTGGATTTCTGCCGAGGACAACCGACCGGCCCAAACGGGCTTGTGTCTGGTTTGACCGAGGCATCCTCTTGGAAGACGTGTGGTACTTCACTGTGCCCACGGAGTCCAGGACTTTTACTTTGAGGAAATTAGAGTGTTTCAAACAGGCGTTCGCCGTGAATAC	95.6	Prorocentrales	Prorocentraceae	Prorocentrum	0	0	0	0	0	0	0	0	0	0	2.9	0	0	4.3	0.4	0	0	0	0	0	0	0	0
OTU_3720	AGCCGCGGTAATCCCAGCTCCAATAGCGTATATTAAAGTTGTTGCGGTTAAAAAGCTCGTAGTTTGACCTCTGCTCAGGTAGACTGGTCCGCCCTCTGGGTGAGCATCTGGCTTGGCCTGGGCATTTTCTTGGTGATCGCAGCTGCCCTTGACTGTGTGGTGCGGAATTCAGGACATTTACTTTGAGGAAATCAGAGTGTTTCAAGCAGGCATCTGCCTTGAATA	99.6	Gonyaulacales	Ceratiaceae	Ceratium	0	0	0	0	0	0	0	0	0	0	0	0	0.5	0	0	0	0	0	0	0	0	6	1
OTU_3699	AGCCGCGGTAATTCCAGCTCCAATAGCGTATATTAAAGTTGTTGCGGTTAAAAAGCTCGTAGTTTGACCTCTGCTCAGGTAGACTGGTCCGCCCTCTGGGTGAGCATCTGGCTTGGCCTGGGCATTTTCTTGGTGATCGCAGCTGCCCTTGACTGTGTGGTGCGGAATTCAGGACATTTACTTGGAGGAAATCAGAGTGTTTCAAGCAGGCATCTGCCTTGAATA	99.6	Gonyaulacales	Ceratiaceae	Ceratium	0	0	0	0	0	0.5	0	0	0	0	0	0	0	0	0	0	0	0	0	0	0	6	1
OTU_3113	AGCCGCGGTAATTCCAGCTCCAATAGCGTATATTAAAGTTGTTGCGGTTAAAAAGCTCGTAGTTTGACCTCTGCTCAGGTAGACTGGTCCGCCCTCTGGGTGAGCATCTGGCTTGGCCTGGGCATTTTCTTGGTGATCGCAGCTGCCCTTGACTGTGTGGTGCGGAATTCAGGACATTTACTTTGAGGAAGTCAGAGTGTTTCAAGCAGGCATCTGCCTTGAATA	99.6	Gonyaulacales	Ceratiaceae	Ceratium	0	0	0	0	0	0.5	0	0	0	0	0	0	0	0	0	0.5	0	0	0	0.5	0	6	0
OTU_3646	AGCCGCGGTAATTCCAGCTCCAATAGCGTATATTAAAGTTGTTGCGGTTAAAAAGCTCGTAGTTTGACCTCTGCTCAGGTAGACTGGTCCGCCCTCTGGGTGAGCATCTGGCTTGGCCTGGGCATTTTCTTGGTGATCGCAGCTGCCCTTGACTGTGTGGTGCGGGATTCAGGACATTTACTTTGAGGAAATCAGAGTGTTTCAAGCAGGCATCTGCCTTGAATA	99.6	Gonyaulacales	Ceratiaceae	Ceratium	0	0	0	0	0	0	0	0	0	0.7	0	0	0	0	0	0.5	0	0	1.4	0	0	4.8	0
OTU_3694	AGCCGCGGTAATTCCAGCTCCAATAGCGTATATTAAAGTTGTTGCGGTTAAAAAGCTCGTAGTTTGACCTCTGCTCAGGTAGACTGGTCCGCCCTCTGGGTGAGCATCTGGCTTGGCCTGGGCATTTGCTTGGTGATCGCAGCTGCCCTTGACTGTGTGGTGCGGAATTCAGGACATTTACTTTGAGGAAATCAGAGTGTTTCAAGCAGGCATCTGCCTTGAATA	99.6	Gonyaulacales	Ceratiaceae	Ceratium	0	0	0	0	0	0	0	0	0	0	0	0.9	0	0.5	0	0	0	0	0	0	0	6	0
OTU_3112	AGCCGCGGTAATTCCAGCTCCAATAGCGTATATTAAAGTTGTTGCGGTTAAAAAGCTCGTAGTTTGACCTCTGCTCAGGTAGACTGGTCCGCCCTCTGGGTGAGCATCTGGCTTGGCCTGGGCATTTTCTTGGTGATCGCAGCTGCCCTTGACTGTGTGGTGCGGAATTCAGGACATTTACTTTGAGGAAACCAGAGTGTTTCAAGCAGGCATCTGCCTTGAATA	99.6	Gonyaulacales	Ceratiaceae	Ceratium	0	0	0	0	0	0.5	0	0	0	0	0	0	0	0	0	0.5	0.2	0	1.4	0	0	4.8	0
OTU_3070	AGCCGCGGTAATTCCAGCTCCAATAGCGTATATTAAAGTTGTTGCGGTTAAAAAGCTCGTAGTTTGACCTCTGCTCAGGTAGACTGGTCCGCCCTCTGGGTGAGCATCTGGCTTGGCCTGGGCATTTTCTTGGTGATCGCAGCTGCCCTTGACTGTGTGGTGCGGAATTCGGGACATTTACTTTGAGGAAATCAGAGTGTTTCAAGCAGGCATCTGCCTTGAATA	99.6	Gonyaulacales	Ceratiaceae	Ceratium	0	0	0	0	0	0.5	0	0	0	0	0	0	0	0	0	0	0.2	0	1.4	0	0	2.4	2.9
OTU_3701	AGCCGCGGTAATTCCAGCTCCAATAGCGTATATTAAAGTTGTTGCGGTTAAAAAGCTCGTAGTTTGACCTCTGCTCAGGTAGACTGGTCCGCCCTCTGGGTGAGCATCTGGCTTGGCCTGGGCATTTTCTTGGTGATCGCAGCTGCCCTTGACTGTGTGGTGCGGAATTCAGGACATTTACTTTGAGGAAATCAGAGTGTTTCAAGCAGGCATCTGCCTTGGATA	99.6	Gonyaulacales	Ceratiaceae	Ceratium	0	0	0	0	1.6	0	0	0	0	0	1.5	0	0	0	0.4	0	0	0	0	0.5	0	2.4	1
OTU_3687	AGCCGCGGTAATTCCAGCTCCAATAGCGTATATTAAAGTTGTTGCGGTTAAAAAGCTCGTGGTTTGACCTCTGCTCAGGTAGACTGGTCCGCCCTCTGGGTGAGCATCTGGCTTGGCCTGGGCATTTTCTTGGTGATCGCAGCTGCCCTTGACTGTGTGGTGCGGAATTCAGGACATTTACTTTGAGGAAATCAGAGTGTTTCAAGCAGGCATCTGCCTTGAATA	99.6	Gonyaulacales	Ceratiaceae	Ceratium	0	0	0.5	0	0	0	0	0	0	0	0	0	0.5	0	0	0	0	0	1.4	0	0	4.8	0
OTU_3510	AGCCGCGGTAATTCCAGCTCCAATAGCGTATATTAAAGTTGTTGCGGTTAAAAAGCTCGTAGTTTGACCTCTGCTCAGGTAGACTGGTCCGCCCTCTGGGTGAGCATCTGGCTTGGCCTGGGCATTTTCTTGGTGATCGCAGCTGCCCTTGACTGTGTGGTGCGGAATTCAGGACATTTACCTTGAGGAAATCAGAGTGTTTCAAGCAGGCATCTGCCTTGAATA	99.6	Gonyaulacales	Ceratiaceae	Ceratium	0	0	0	0	0	0	0	0	0	0.7	0	0	0	0.5	0	0	0	0	0	0	0	6	0
OTU_3114	AGCCGCGGTAATTCCAGCTCCAATAGCGTATATTAAAGTTGTTGCGGTTAAAAAGCTCGTAGTTTGACCTCTGCTCAGGTAGACTGGTCCGCCCTCTGGGTGAGCATCTGGCTTGGCCTGGGCGTTTTCTTGGTGATCGCAGCTGCCCTTGACTGTGTGGTGCGGAATTCAGGACATTTACTTTGAGGAAATCAGAGTGTTTCAAGCAGGCATCTGCCTTGAATA	99.6	Gonyaulacales	Ceratiaceae	Ceratium	0	0	0.5	0	1.6	1.4	0	0	0	0	0	0	0	0	0	0	0	0	0	0	0	3.6	0
OTU_3706	AGCCGCGGTAATTCCAGCTCCAATAGCGTATATTAAAGTTGTTGCGGTTAAAAAGCTCGTAGTTTGACCTCTGCTCAGGTAGACTGGTCCGCCCTCTGGGTGAGCATCTGGCTTGGCCTGGGCATTTTCTTGGTGATCGCAGCTGCCCTTGACTGTGTGGTGCGGAATTCAGGACATGTACTTTGAGGAAATCAGAGTGTTTCAAGCAGGCATCTGCCTTGAATA	99.6	Gonyaulacales	Ceratiaceae	Ceratium	0	0	0.5	0	0	0	0	0	0	0	0	0	0.5	0	0	0	0	0	0	0	0	6	0
OTU_4491	AGCCGCGGTAATTCCAGCTCCAATAGCGTATATTAAAGTTGTTGCGGTTAAAAAGCTCGTAGTTTGACCTTTGCTCAGGTAGACTGGTCCGCCCTCTGGGTGAGCATCTGGCTTGGCCTGGGCATTTTCTTGGTGATCGCAGCTGCCCTTGACTGTGTGGTGCGGAATTCAGGACATTTACTTTGAGGAAATCAGAGTGTTTCAAGCAGGCATCTGCCTTGAATA	99.6	Gonyaulacales	Ceratiaceae	Ceratium	0	0	0	0	1.6	0.5	0	0	0	0	0	0	0	0	0	0	0	0	1.4	0	0	3.6	0
OTU_10595	AATAACTTAGCATGGAATAATACATCGGGACTTTGGTTATTTTTTGTTGGTTTATAGAACTGAAGTAATGATGAATAGGAATAGTTGGGGGCATTCGTATTTAACTGTCAGAGGTGAAATTCTTGGATTTGTTAAAGATGACCTACTGCGAAAGCATTTGCCAAAGATGTTTTCATTGATCAAGAACGAAAGTTAGGGGATCGAAGACGATCAGATACCGCCGAA	100	Gonyaulacales	Ceratiaceae	Ceratium	0	0	0	0	0	0	0	0	0	0	0	0	0	0.5	0	0.5	0	0	0	0	0	6	0
OTU_3107	AGCCGCGGTAATTCCAGCTCCAATAGCGTATATTAAAGTTGTTGCGGTTAAAAAGCTCGTAGTTTGACCTCTGCTCAGGCAGACTGGTCCGCCCTCTGGGTGAGCATCTGGCTTGGCCTGGGCATTTTCTTGGTGATCGCAGCTGCCCTTGACTGTGTGGTGCGGAATTCAGGACATTTACTTTGAGGAAATCAGAGTGTTTCAAGCAGGCATCTGCCTTGAATA	99.6	Gonyaulacales	Ceratiaceae	Ceratium	0	0	0	0	0	0.5	0	0	0	0	0	0.9	0.5	0	0	0	0.2	0	0	0	0	4.8	0
OTU_4431	AGCCGCGGTAATTCCAGCTCCAATAGCGTATATTAAAGTTGTTGCGGTTAGAAAGCTCGTAGTTTGACCTCTGCTCAGGTAGACTGGTCCGCCCTCTGGGTGAGCATCTGGCTTGGCCTGGGCATTTTCTTGGTGATCGCAGCTGCCCTTGACTGTGTGGTGCGGAATTCAGGACATTTACTTTGAGGAAATCAGAGTGTTTCAAGCAGGCATCTGCCTTGAATA	99.6	Gonyaulacales	Ceratiaceae	Ceratium	0	0	0	0	0	0	0	0	0	0	0	0.9	0	0	0	0	0	0	0	0	0	6	0
OTU_3705	AGCCGCGGTAATTCCAGCTCCAATAGCGTATATTAAAGTTGTTGCGGTTAAAAAGCTCGTAGTTTGACCTCTGCTCAGGTAGACTGGTCCGCCCTCTGGGTGAGCATCTGGCTTGGCCTGGGTATTTTCTTGGTGATCGCAGCTGCCCTTGACTGTGTGGTGCGGAATTCAGGACATTTACTTTGAGGAAATCAGAGTGTTTCAAGCAGGCATCTGCCTTGAATA	99.6	Gonyaulacales	Ceratiaceae	Ceratium	0	0	0	0	0	0	0	0	0	0	0	0	0	0	0.4	0	0	0	0	0.5	0	6	0
OTU_3709	AGCCGCGGTAATTCCAGCTCCAATAGCGTATATTAAAGTTGTTGCGGTTAAAAAGCTCGTAGTTTGACCTCTGCTCAGGTAGACTGGTCCGCCCTCTGGGTGAGCATCTGGCTTGGCCTGGGCATTTTCTTGGTGATCGCAGCTGCCCTTGACTGTGTGGTGCGGCATTCAGGACATTTACTTTGAGGAAATCAGAGTGTTTCAAGCAGGCATCTGCCTTGAATA	99.6	Gonyaulacales	Ceratiaceae	Ceratium	0	0	0	0	0	0	0	0	0	1.5	0	0	0	0.5	0	0	0	0	0	0	0	4.8	0
OTU_4435	AGCCGCGGTAATTCCAGCTCCAATAGCGTATATTAAAGTTGTTGCGGTTAAAAAAGCTCGTAGTTTGACCTCTGCTCAGGTAGACTGGTCCGCCCTCTGGGTGAGCATCTGGCTTGGCCTGGGCATTTTCTTGGTGATCGCAGCTGCCCTTGACTGTGTGGTGCGGAATTCAGGACATTTACTTTGAGGAAATCAGAGTGTTTCAAGCAGGCATCTGCCTTGAAT	99.6	Gonyaulacales	Ceratiaceae	Ceratium	0	0	0	0	0	0.5	0	0	0	0	1.5	0	0	0	0	0	0	0	0	0	0	4.8	0
OTU_4421	AGCCGCGGTAATTCCAGCTCCAATAGCGTATATTAAAGTTGTTGCGGTTAAAAAGCTCGTAGTTTGACCTCTGCTCAGGTAGACTGGTCCGCCCTCTGGGTGAGCATCTGGCTTGGCCTGGGCATTTTCTTGGTGATCGCAGCTGCCCTTGACTGTGTGGTGCGGAATGCAGGACATTTACTTTGAGGAAATCAGAGTGTTTCAAGCAGGCATCTGCCTTGAATA	99.6	Gonyaulacales	Ceratiaceae	Ceratium	0	0	0	0	0	0	0	0	0	0	0	0	0.5	0	0	0	0	0	1.4	0	0	4.8	0
OTU_3595	AGCCGCGGTAATTCCAGCTCCAATAGCGTATATTAAAGTTGTTGCGGTTAAAAAGCTCGTAGTTTGACCTCTGCTCAGGTAGACTGGTCCGCCCTCTGGGTGAGCATCTGGCTTGGCCTGGGCATTTTCTTGGTGATCGCAGCTGCCCTTGGCTGTGTGGTGCGGAATTCAGGACATTTACTTTGAGGAAATCAGAGTGTTTCAAGCAGGCATCTGCCTTGAATA	99.6	Gonyaulacales	Ceratiaceae	Ceratium	0	0	0	0	0	0.5	0	0	0	0	0	0	0	0	0	0	0.2	0	0	0	0	6	0
OTU_3368	AGCCGCGGTAATTCCAGCTCCAATAGCGTATATTAAAGTTGTTGCGGTTAAAAAGCTCGTAGTTGGATTTCTGCCGAAGGAGACCGGTCCGCCCTCTGGGTGAGTATCTGGATCTCTTTGGACATCTTCTTGGGGAACGTATCTGCACTTCATTGTGCGGTGCGGTACTCAAGACTTTTACTTTGAGGAAATTAGAGTGTTTCAAGCAGGCACACGCCTTGAATA	99.6	Peridiniales	Kryptoperidiniaceae	Unruhdinium	0	0	0	0	0	0	0	0	0	3.7	0	0	0	0	0	0	0	0	0	0	3	0	0
OTU_4426	AGCCGCGGTAATTCCAGCTCCAATAGCGTATATTAAAGTTGTTGCGGTTAAAAAGCTCGTAGTTTGACCTCTGCTCAGGTAGACTGGTCCGCCCTCTGGGTGAGCATCTGGCTTGGCCTGGGCATTTCCTTGGTGATCGCAGCTGCCCTTGACTGTGTGGTGCGGAATTCAGGACATTTACTTTGAGGAAATCAGAGTGTTTCAAGCAGGCATCTGCCTTGAATA	99.6	Gonyaulacales	Ceratiaceae	Ceratium	0	0	0	0	0	0	0	0	0	0.7	0	0.9	0	0	0	0	0	0	1.4	0	0	3.6	0
OTU_3318	AGCCGCGGTAATTCCAGCTCCAATAGCGTATATTAAAGTTGTTGCAGTTAAAAAGCTCGTAGTTGGATCTCTGCTCAGGTAGACTGGTCCGCCCTCTGGGTGAGCATCTGGCTTGGCCTGGGCATTTTCTTGGTGATCGCAGCTGCCCTTGACTGTGTGGTGCGGAATTCAGGACATTTACTTTGAGGAAATCAGAGTGTTTCAAGCAGGCATCTGCCTTGAATA	98.7	Gonyaulacales	Ceratiaceae	Ceratium	0	0	1	0	0	0	0	0	0	0	0	0	0	0.5	0	0.5	0	3.6	0	0	0	0	1
OTU_4500	AGCCGCGGTAATTCCAGCTCCAATAGCGTATGTTAAAGTTGTTGCGGTTAAAAAGCTCGTAGTTTGACCTCTGCTCAGGTAGACTGGTCCGCCCTCTGGGTGAGCATCTGGCTTGGCCTGGGCATTTTCTTGGTGATCGCAGCTGCCCTTGACTGTGTGGTGCGGAATTCAGGACATTTACTTTGAGGAAATCAGAGTGTTTCAAGCAGGCATCTGCCTTGAATA	99.6	Gonyaulacales	Ceratiaceae	Ceratium	0	0	0	0	0	0	0	1.3	0	0	0	0	0	0	0.4	0	0	0	0	0	0	4.8	0
OTU_1957	AGCCGCGGTAATTCCAGCTCCAATAGCGTATATTAAAGTTGTTGCGGTTAAAAAGCTCGTAGTTGGATTTCTGCTGGGGACGACCGGTCCGCCTTCTGGGTGAGTATCTGGATCTGCCTTGGCATCTCCTTGGGGAACGTAGCTGCACTTGACTGTGTGGTGCGGAATCCAGGGCATTTACTTTGAGAAAATTAGAGTGTTTCAAGCAGGCACAAGCCTTGAATA	99.6	Dinophyceae_X	Dinophyceae_XX	Dinophyceae_XXX	0	0	0	0	1.6	0	4.4	0	0	0	0	0	0.5	0	0	0	0	0	0	0	0	0	0
OTU_7473	AGCCGCGGTAATTCCAGCTCCAATAGCGTATATTAAAGTGTTGCGGTTAAAAAGCTCGTAGTTGGATTTCTGCTTAGGTAGACTGGTCCGCCCTCTGGGTGAGCATCTGGCTTGGCCTGGGCATTTTCTTGGTGATCGCAGCTGCCCTTGACTGTGTGGTGTGGAACTCAGGACTTTTACTTTGAGGAAATCATTGTGCTTCAAGCAGGTATCTGCCTTGAATAA	97.8	Gonyaulacales	Ceratiaceae	Ceratium	0	0	0	0	6.5	0	0	0	0	0	0	0	0	0	0	0	0	0	0	0	0	0	0
OTU_3794	AGCCGCGGTAATTCCAGCTCCAATAGCGTATATTAAAGTTGTTGCGGTTAAAAAGCTCGTAGTTGGATTTCTGTCGAAGGAGACCGGTCCGCCCTCTGGGTGAGTATCTGGATCTCTTTGGACATCTTCTTGGGGAACGTATCTGCACTTCATTGTGCGGTGCGGTACTCAAGCCTTTTACTTTGAGGAAATTAGAGTGTTTCAAGCAGGCACACGCCTTGAATA	99.6	Peridiniales	Kryptoperidiniaceae	Unruhdinium	0	0	0	0	0	0	0	0	0	3	0	0.9	0	0	0	0	0	0	1.4	0	0	1.2	0
OTU_4418	AGCCGCGGTAATTCCAGCTCCAATAGCGTATATTAAAGTTGTTGCGGTTAAAAAGCTCGTAGTTTGACCTCTGCTCAGGTAGACTGGTCCGCCCTCTGGGTGAGCATCTGGCTTGGCCTGGGCATTTTCTTGGTGATCGCAGCTGCCCTTGACTGTGTGGTGCGGAATTCAGGACATTTACTTTGAGTAAATCAGAGTGTTTCAAGCAGGCATCTGCCTTGAATA	99.6	Gonyaulacales	Ceratiaceae	Ceratium	0	0	0.5	0	1.6	0	0	0	0	0	0	0.9	0	0	0	0	0	0	0	0	0	2.4	1
OTU_4263	AGCCGCGGTAATTCCAGCTCCAATAGCGTATATTAAAGTTGTTGCGGTTAAAAAGCTCGTAGTTTGACCTCTGCTCAGGTAGACTGGTCCGCCCTCTGGGTGAGCATCTGGCTTGGCCTGGGCATTTTCTTGGTGATCGCAGCTGCCATTGACTGTGTGGTGCGGAATTCAGGACATTTACTTTGAGGAAATCAGAGTGTTTCAAGCAGGCATCTGCCTTGAATA	99.6	Gonyaulacales	Ceratiaceae	Ceratium	0	0	0	0	0	0	0	0	0	0	0	0	0	0	0.4	0	0	0	0	0	0	6	0
OTU_3823	AGCCGCGGTAATTCCAGCTCCAATAGCGTATATTAAAGTTGTTGCGGTTAAAAAGCTCGTAGTTTGACCTCTGCTCAGGTAGACTGGTCCGCCCTCTGGGTGAGCATCTGGCTTGGCCTGGGCATTTTCTTGGTGATCGCAGCTGCCCTTGACTGTGTGGTGCGGAATTCAGGACATTTACTTTGAGGAAATCAGAGTGTTTCAAGCAGGCATCTGTCTTGAATA	99.6	Gonyaulacales	Ceratiaceae	Ceratium	0.7	0	0	0	0	0	0	0	0	0	0	0.9	0	0	0	0	0	0	0	0	0	4.8	0
OTU_4453	AGCCGCGGTAATTCCAGCTCCAATAGCGTATATTAAAGTTGTTGCGGTTAAAAAGCTCATAGTTTGACCTCTGCTCAGGTAGACTGGTCCGCCCTCTGGGTGAGCATCTGGCTTGGCCTGGGCATTTTCTTGGTGATCGCAGCTGCCCTTGACTGTGTGGTGCGGAATTCAGGACATTTACTTTGAGGAAATCAGAGTGTTTCAAGCAGGCATCTGCCTTGAATA	99.6	Gonyaulacales	Ceratiaceae	Ceratium	0	0	0	0	1.6	0.5	0	0	0	0	0	0	0	0	0	0.5	0	0	1.4	0	0	2.4	0
OTU_3780	AGCCGCGGTAATTCCAGCTCCAATAGCGTATATTAAAGTTGTTGCGGTTAAAAAGCTCGTAGTTTGACTTCTGCTCAGGTAGACTGGTCCGCCCTCTGGGTGAGCATCTGGCTTGGCCTGGGCATTTTCTTGGTGATCGCAGCTGCCCTTGACTGTGTGGTGCGGAATTCAGGACATTTACTTTGAGGAAATCAGAGTGTTTCAAGCAGGCATCTGCCTTGAATA	99.6	Gonyaulacales	Ceratiaceae	Ceratium	0	0	1	0	0	0	0	0	0	0	0	0	0	0.5	0	0	0	0	0	0	0	4.8	0
OTU_4541	AGCCGCGGTAATTCCAGCTCCAATAGCGTATATTAAAGTTGTTGCGGTTAAAAAGCTCGTAGTTTGACCTCTGCTCAGGTAGACTGGTCCGCCCTCTGGGTGAGCATCTGGCTTGGCCTGGGCATTTTCTTGGTGATCGCAGCTGCCCTTGACTGTGTGGTGCGGAATTCAGGACATTTGCTTTGAGGAAATCAGAGTGTTTCAAGCAGGCATCTGCCTTGAATA	99.6	Gonyaulacales	Ceratiaceae	Ceratium	0	0	0	0	0	0	0	0	0	0.7	0	0	0	0	0.4	0	0	0	2.8	0	0	2.4	0
OTU_4478	AGCCGCGGTAATTCCAGCTCCAATAGCGTATATTAAAGTTGTTGCGGTTAAAAAGCTCGTAGTTTGACCTCTGCTCAGGTAGACCGGTCCGCCCTCTGGGTGAGCATCTGGCTTGGCCTGGGCATTTTCTTGGTGATCGCAGCTGCCCTTGACTGTGTGGTGCGGAATTCAGGACATTTACTTTGAGGAAATCAGAGTGTTTCAAGCAGGCATCTGCCTTGAATA	99.6	Gonyaulacales	Ceratiaceae	Ceratium	0	0	0	0	0	0	0	0	0	0	0	0	0	0.5	0	0	0	0	0	0	0	4.8	1
OTU_4415	AGCCGCGGTAATTCCAGCTCCAATAGCGTATATTAAAGTTGTTGCGGTTAAAAAGCTCGTAGTTTGACCTCTGCTCAGGTAGACTGGTCCGCCCTCTGGGTGAGCATCTGGCTTGGCCTGGGCATTTTCTTGGTGATCGCAGCTGCCCGTGACTGTGTGGTGCGGAATTCAGGACATTTACTTTGAGGAAATCAGAGTGTTTCAAGCAGGCATCTGCCTTGAATA	99.6	Gonyaulacales	Ceratiaceae	Ceratium	0	0	0.5	0	0	0	0	0	0	0	0	0.9	0	0	0	0	0	0	0	0	0	4.8	0
OTU_4423	AGCCGCGGTAATTCCAGCTCCAATAGCGTATATTAAAGTTGTTGCGGTTAAAAAGCTCGTAGTTTGACCTCTGCTCAGGTAGACTGGTCCGCCCTCTGGGTGAGCATCTGGCTTGGCCTGGGCATTTTCTTGGTGATCGCAGCTGCCCTTGACTGTGTGGTGCGGAATTCAGGACATTTACTTTGAGGAAATCAAAGTGTTTCAAGCAGGCATCTGCCTTGAATA	99.6	Gonyaulacales	Ceratiaceae	Ceratium	0	0	0	0	0	0	0	0	0	0	0	0	0	0	0	0	0	0	0	0.5	0	4.8	1
OTU_5560	AGCCGCGGTAATTCCAGCTCCAATAGCGTATATTAAAGTTGTTGCGGTTAAAAAGCTCGTAGTTTGACCTCTGCTCAGGTAGACTGGTCCGCCCTCTGGGTGAGCATCTGGCTTGGCCTGGGCATTTTCTTGGTGATCACAGCTGCCCTTGACTGTGTGGTGCGGAATTCAGGACATTTACTTTGAGGAAATCAGAGTGTTTCAAGCAGGCATCTGCCTTGAATA	99.6	Gonyaulacales	Ceratiaceae	Ceratium	0	0	0	0	0	0	0	0	0	0	1.5	0	0	0	0	0	0	0	1.4	0	0	2.4	1
OTU_4388	AGCCGCGGTAATTCCAGCTCCAATAGCGTATATTAAAGTTGTTGCGGTTAAAAAGCTCGTAGTTCGACCTCTGCTCAGGTAGACTGGTCCGCCCTCTGGGTGAGCATCTGGCTTGGCCTGGGCATTTTCTTGGTGATCGCAGCTGCCCTTGACTGTGTGGTGCGGAATTCAGGACATTTACTTTGAGGAAATCAGAGTGTTTCAAGCAGGCATCTGCCTTGAATA	99.6	Gonyaulacales	Ceratiaceae	Ceratium	0	0	0	0	0	0	0	0	0	0	1.5	0	0.5	0	0	0	0	0	0	0.5	0	3.6	0
OTU_2868	AGCCGCGGTAATTCCAGCTCCAATAGCGTATATTAAAGTTGTTGCGGTTAAAAAGCTCGTAGTTGGATTTCTGTCGAAGGAGACCGGTCCGCCCTCTGGGTGAGTATCTGGATCTCTTTGGACATCTTCTTGGGGAACGTATCTGCACTTCATTGTGCGGTGCGGTACTCAAGACTTTTACTTTGAGGACATTAGAGTGTTTCAAGCAGGCACACGCCTTGAATA	99.6	Peridiniales	Kryptoperidiniaceae	Unruhdinium	0	0	0	0	0	0	0	0	0	3	0	0	1.6	0	0	0	0	0	0	0	1.5	0	0
OTU_5151	AGCCGCGGTAATTCCAGCTCCAATAGCGTATATTAAAGTTGTTGCGGTTAAAAAGCTCGTAGTTGGATTTCTGTTCAGGACGACCGGTCCGCCCTCCGGGTGAGCATCTGGTTCGGCCTGGGCATCTTCTTGGAGAACGTCGCTGCACTTGACTGTGTGGCGCGGTATCCAGGACTTTTACTTTGAGGAAATTAGAGTGTTTCAAGCAGGCACACGCCTTGAATA	97.8	Peridiniales	Thoracosphaeraceae	Scrippsiella	0	0	0	0	0	0	0	0	0	0	0	0	0.5	0	0	0	0	0	5.5	0	0	0	0
OTU_3954	AGCCGCGGTAATTCCAGCTCCAATAGCGTATATTAAAGTTGTTGCGGTTAAGAAGCTCGTAGTTTGACCTCTGCTCAGGTAGACTGGTCCGCCCTCTGGGTGAGCATCTGGCTTGGCCTGGGCATTTTCTTGGTGATCGCAGCTGCCCTTGACTGTGTGGTGCGGAATTCAGGACATTTACTTTGAGGAAATCAGAGTGTTTCAAGCAGGCATCTGCCTTGAATA	99.6	Gonyaulacales	Ceratiaceae	Ceratium	0	0	0	0	0	0	0	0	0	0	0	0	0	0	0	0	0	0	0	0	0	6	0
OTU_5587	AGCCGCGGTAATTCCAGCTCCAATAGCGTATATTAAAGTTGTTGCGGTTAAAAAGCTCGTAGTTTGACCTCTGCTCAGGTAGACTGGTCCGCCCTATGGGTGAGCATCTGGCTTGGCCTGGGCATTTTCTTGGTGATCGCAGCTGCCCTTGACTGTGTGGTGCGGAATTCAGGACATTTACTTTGAGGAAATCAGAGTGTTTCAAGCAGGCATCTGCCTTGAATA	99.6	Gonyaulacales	Ceratiaceae	Ceratium	0	0	0	0	0	0	0	0	0	0	0	0	0	0	0	0	0	0	0	0	0	6	0
OTU_3911	AGCCGCGGTGATTCCAGCTCCAATAGCGTATATTAAAGTTGTTGCGGTTAAAAAGCTCGTAGTTTGACCTCTGCTCAGGTAGACTGGTCCGCCCTCTGGGTGAGCATCTGGCTTGGCCTGGGCATTTTCTTGGTGATCGCAGCTGCCCTTGACTGTGTGGTGCGGAATTCAGGACATTTACTTTGAGGAAATCAGAGTGTTTCAAGCAGGCATCTGCCTTGAATA	99.6	Gonyaulacales	Ceratiaceae	Ceratium	0	0	0	0	0	0	0	0	1.9	0	0	0	0	0	0.7	0	0	0	0	0	0	2.4	1
OTU_2990	AGCCGCGGTAATTCCAGCTCCAATAGCGTATATTAAAGTTGTTGCGGTTAAAAAGCTCGTAGTTTGACCTCTGCTCAGGTAGACTGGTCCGCCCTCTGGGTGAGCATCTGGCTTGGCCTGGGCATTTTCTTGGCGATCGCAGCTGCCCTTGACTGTGTGGTGCGGAATTCAGGACATTTACTTTGAGGAAATCAGAGTGTTTCAAGCAGGCATCTGCCTTGAATA	99.6	Gonyaulacales	Ceratiaceae	Ceratium	0	0	0.5	0	0	0.9	0	1.3	0	0	0	0	0	0	0.4	0	0	0	0	0.5	0	2.4	0
OTU_1457	AGCCGCGGTAATTCCAGCTCCAATAGCGTATATTAAAGTTGTTGCGGTTAAAAAGCTCGTAGTTGGATTTCTGCCGAGGACGACCGACCGACCCATACGGGTTTGTGTCTGGTTAGACCGAGGCATCCTCTTGGAAGACATATCCACTTCACTGTGGTTATGGAGTCCAGGACTTTTACTTTGAGGAAATTAGAGTGTTTCAAACAGGCGTTCGCCGTGAATACA	96.9	Prorocentrales	Prorocentraceae	Prorocentrum	0	0	4.2	0	0	0	0	0	0	0	1.5	0	0	0	0.4	0	0	0	0	0	0	0	0
OTU_3576	AGCCGCGGTAATTCCAGCTCCAATAGCGTATATTAAAGTTGTTGCGGTTAAAAAGCTCGTAGTTTGACCTCTGCTCAGGTAGACTGGTCCGCCCTCTGGGTGAGCATCTGGCTTGGCCTGGGCATTTTCTTGGTGATCGCAGCTGCCCTTGACTGTGTGATGCGGAATTCAGGACATTTACTTTGAGGAAATCAGAGTGTTTCAAGCAGGCATCTGCCTTGAATA	99.6	Gonyaulacales	Ceratiaceae	Ceratium	0	0	0	0	0	0.5	0	0	0	0	0	0	0	0	0	0.5	0.2	0	0	0	0	4.8	0
OTU_3371	AGCCGCGGTAATTCCAGCTCCAATAGCGTATATTAAAGTTGTTGCGGTTAAAAAGCTCGTAGTTGGATTTCTGTCGAAGGAGACCGGTCCGCCCTCTGGGTGAGTATCTGGATCTCTTTGGACATCTTCTTGGGGAACGTATCTGCACTTCATTGCGCGGTGCGGTACTCAAGACTTTTACTTTGAGGAAATTAGAGTGTTTCAAGCAGGCACACGCCTTGAATA	99.6	Peridiniales	Kryptoperidiniaceae	Unruhdinium	0	0	0	0	0	0	0	0	0	4.5	0	0	0	0	0	0	0	0	0	0	1.5	0	0
OTU_4230	AGCCGCGGTAATTCCAGCTCCAATAGCGTATATTAAAGTTGTTGCGGTTAAAAAGCTCGTAGTTTGACCTCTGCTCAGGTAGACTGGTCCGCCCTCTGGGTGAGCATCTGGCTTAGCCTGGGCATTTTCTTGGTGATCGCAGCTGCCCTTGACTGTGTGGTGCGGAATTCAGGACATTTACTTTGAGGAAATCAGAGTGTTTCAAGCAGGCATCTGCCTTGAATA	99.6	Gonyaulacales	Ceratiaceae	Ceratium	0	0	0	0	0	0	0	0	0	0	0	0	0.5	0	0.4	0	0	0	1.4	0	0	3.6	0
OTU_3287	AGCCGCGGTAATTCCAGCTCCAATAGCGTATATTAAAGTTGTTGCGGTTAAAAAGCTCGTAGTTGGATTTCTGCTGAGGACGACCGGTCCGCCCTCTGGGTGAGTATCTGGCTCGGCCTTGGCATCTTCTTGGAGAACGTTACTGCACTTGATTGTGTGGTGCGGTATCCAGGACTTTTACTTTGAGGAAATTAGAGTGTTTCAAGCAGGCGCACGCCTTGAATA	100	Gymnodiniales	Gymnodiniaceae	Gymnodinium	1.3	2.6	0	0	0	0	0	0	1.9	0	0	0	0	0	0	0	0	0	0	0	0	0	0
OTU_3763	AGCCGCGGTAATTCCAGCTCCAATAGCGTATATTAAAGTTGTTGCGGTTAAAAAGCTCGTAGTTGGATTTCTGTCGAAGGAGACCGGTCCGCCCTCTGGGTGAGTATCTGGATCTCTTTGGACATCTTCTTGGGGAACGTATCTGCACTTCATTGTTCGGTGCGGTACTCAAGACTTTTACTTTGAGGAAATTAGAGTGTTTCAAGCAGGCACACGCCTTGAATA	99.6	Peridiniales	Kryptoperidiniaceae	Unruhdinium	0	0	0	0	0	0	0	0	0	3	0	0.9	0.5	0	0	0	0	0	1.4	0	0	0	0
OTU_4097	AGCCGCGGTAATTCCAGCTCCAATAGCGTATATTAAAGTTGTTGCGGTTAAAAAGCTCGTAGTTGGATTTCTGTCGAAGGAGACCGGTCCGCCCTCTGGGTGAGTATCTGGATCTCTTTGGACATCTTCTTGGGGAACGTATCTGCACTTCATTGTGCGGTGCGGTACTCAAGACTTTTACTTTGAGGAAATTAGAGTGTTTCAAGCAGGCGCACGCCTTGAATA	99.6	Peridiniales	Kryptoperidiniaceae	Unruhdinium	0	0	0	0	0	0	0.5	0	0	2.2	0	0	0	0	0	0	0	0	0	0	3	0	0
OTU_7268	AGCCGCGGTAATTCCAGCTCCAATAGCGTATATTAAAGTTGTTGCGGTTAAAAAGCTCGTAGTTTGACCTCTGCTCAGGTAGACTGGTCCGCCCTCTGGGTGAGCATCTGGCTTGGCCTGGGCATTTTCTTGGTGATCGCAGCTGCCCTTGACTGTGTGGTGCGGAATTCAGGACATTTACTTTGTGGAAATCAGAGTGTTTCAAGCAGGCATCTGCCTTGAATA	99.6	Gonyaulacales	Ceratiaceae	Ceratium	0	0	0	0	0	0	0	0	0	0.7	0	0	0	0	0	0	0	0	1.4	0	0	3.6	0
OTU_4526	AGCCGCGGTAATTCCAGCTCCAATAGCGTATATTAAAGTTGTTGCGGTTAAAAAGCTCGTAGTCTGACCTCTGCTCAGGTAGACTGGTCCGCCCTCTGGGTGAGCATCTGGCTTGGCCTGGGCATTTTCTTGGTGATCGCAGCTGCCCTTGACTGTGTGGTGCGGAATTCAGGACATTTACTTTGAGGAAATCAGAGTGTTTCAAGCAGGCATCTGCCTTGAATA	99.6	Gonyaulacales	Ceratiaceae	Ceratium	0	0	0.5	0	0	0	0	0	0	0	0	0	0	0	0.4	0	0	0	0	0	0	4.8	0
OTU_4434	AGCCGCGGTAATTCCAGCTCCAATAGCGTATATTAAAGTTGTTGCGGTTAAAAAGCTCGTAGTTTGACCTCTGCTCAGGTAGACTGGTCCGCCCTCTGGATGAGCATCTGGCTTGGCCTGGGCATTTTCTTGGTGATCGCAGCTGCCCTTGACTGTGTGGTGCGGAATTCAGGACATTTACTTTGAGGAAATCAGAGTGTTTCAAGCAGGCATCTGCCTTGAATA	99.6	Gonyaulacales	Ceratiaceae	Ceratium	0	0	0	0	0	0	0	0	0	0	0	0	0	0.5	0.4	0	0	0	0	0	0	4.8	0
OTU_4422	AGCCGCGGTAATTCCAGCTCCAATAGCGTATATTAAAGTTGTTGCGGTTAAAAAGCTCGTAGTTTGACCTCTGCTCAGGTAGACTGGTCCGCCCTCTGGGTGAGCATCTGGCTTGGCTTGGGCATTTTCTTGGTGATCGCAGCTGCCCTTGACTGTGTGGTGCGGAATTCAGGACATTTACTTTGAGGAAATCAGAGTGTTTCAAGCAGGCATCTGCCTTGAATA	99.6	Gonyaulacales	Ceratiaceae	Ceratium	0	0	0	0	0	0	0	0	0	0	0	0	0	0.5	0.4	0	0	0	0	0	0	4.8	0
OTU_5642	AGCCGCGGTAATTCCAGCTCCAATAGCGTATATTAAAGTTGTTGCGGTTAAAAAGCTCGTAGTTTGACCTCTGCTCAGGTAGACTGGTCCGCCCTCTGGGTGAGTATCTGGCTCGGGCTGGGCATCTTCTTGGAAAGCGTAGCTGCGCTTGACTGTGTGGCGCGGTGTCCAAGACTTTTACTTTGAGGAAATTAGAGTGCTTCAAGCAGGCGCACGCCCTGAATA	96	Peridiniales	Peridiniaceae	Peridinium	0	0	0	0	1.6	0	0	0	0	0	0	0.9	0	0	0	0	0	0	0	0	0	1.2	1.9
OTU_3677	AGCCGCGGTAATTCCAGCTCCAATAGCGTATATTAAAGTTGTTGCGGTTAAAAAGCTCGTAGTTTGACCTCTGCTCAGGTAGACTGGTCCGCCCTCTGGGTGAGCATCTGGCTTGGCCTGGGCATTTTCTTGGTGATCGCAGCTGCCCTTGACTGTGTGGTGCGGAATTCAGGACATTTACTTTGAGGAAATCAGGGTGTTTCAAGCAGGCATCTGCCTTGAATA	99.6	Gonyaulacales	Ceratiaceae	Ceratium	0	0	0	0	0	0	0	0	0	0	0	0	1.1	0.9	0	0	0	0	0	0	0	3.6	0
OTU_5630	AGCCGCGGTAATTCCAGCTCCAATAGCGTATATTAAAGTTGTTGCGGTTAAAAAGCTCGTAGTTTGACCTCTGCTCAGGTAGACTGGTCCGCCCTCTGGGTGAGCATCTGGCTTGGCCTGGGCATTTTCTTGGTGATCGCAGCTGCCCTTGACTGTGTGGTGCGGAACTCAGGACATTTACTTTGAGGAAATCAGAGTGTTTCAAGCAGGCATCTGCCTTGAATA	99.6	Gonyaulacales	Ceratiaceae	Ceratium	0	0	0.5	0	1.6	0	0	0	0	0	0	0.9	0	0	0	0	0	0	1.4	0	0	1.2	0
OTU_4382	GGCCGCGGTAATTCCAGCTCCAATAGCGTATATTAAAGTTGTTGCGGTTAAAAAGCTCGTAGTTTGACCTCTGCTCAGGTAGACTGGTCCGCCCTCTGGGTGAGCATCTGGCTTGGCCTGGGCATTTTCTTGGTGATCGCAGCTGCCCTTGACTGTGTGGTGCGGAATTCAGGACATTTACTTTGAGGAAATCAGAGTGTTTCAAGCAGGCATCTGCCTTGAATA	100	Gonyaulacales	Ceratiaceae	Ceratium	0	0	0	0	0	0.5	0	0	0	0	0	0.9	0	0	0	0	0	0	1.4	0.5	0	2.4	0
OTU_5831	AGCCGCGGTAATTCCAGCTCTAATAGCGTATATTAAAGTTGTTGCAGTTAAAAAGCTCGTAGTCGGATGTCGGGCTCGGGCAGGCTGTCGGCTTCGGTCGGACGGCAGGCTCGGGTCTTTCTGCCTGAGGAACCCGTGGCACTTAACTGTGCGGCGTGGGGACGCAGGCCGTTTACTTTGAAAAAATTAGAGTGTTCAAAGCAGGCCTACGCTTGAATACATTAG	100	Dinophyceae_X	Dinophyceae_XX	Dinophyceae_XXX	2	0	0	0	0	0	0	0	0	0	0	0	0	0	0	0	0	3.6	0	0	0	0	0
OTU_3138	AGCCGCGGTAATTCCAGCTCCAATAGCGTATATTAAAGTTGTTGCGGTTAAAAAGCTCGTAGTTTGACCTCTGCTCAGGTAGACTGGTCCGCCCTCTGGGTGAGCATCTGGCTTGGCCTGGGCATTTTCTTGGTGATCGCAGCTGCCCTTGACGGTGTGGTGCGGAATTCAGGACATTTACTTTGAGGAAATCAGAGTGTTTCAAGCAGGCATCTGCCTTGAATA	99.6	Gonyaulacales	Ceratiaceae	Ceratium	0	0	0.5	0	0	0	0	0	0	0.7	0	0	0	0.5	0	0	0.2	0	0	0	0	3.6	0
OTU_5580	AGCCGCGGTAATTCCAGCTCCAATAGCGTATATTAAAGTTGTTGCGGTTAAAAAGCTCGTAGTTTGACCTCTGCTCAGGTAGACTGGTCCGCCCTCTGGGTGAGCATCTGGCTTGGCCTGGGCATTTTCTTGGTGATCGCAGCTACCCTTGACTGTGTGGTGCGGAATTCAGGACATTTACTTTGAGGAAATCAGAGTGTTTCAAGCAGGCATCTGCCTTGAATA	99.6	Gonyaulacales	Ceratiaceae	Ceratium	0	0	0	0	0	0	0	0	0	0.7	0	0	0	0	0	0	0	0	0	0	0	4.8	0
OTU_4438	AGCCGCGGTAATTCCAGCTCCAATAGCGTATATTAAAGTTGTTGCGGTTAAAAAGCTCGTAGTTTGACCTCTGCTCAGGTAGACTGGTCCGCCCTCTGGGTGAGCATCTGGCTTGGCCTGGGCATTTTCTTGGTGATCGCAGCTGCCCTTGACTGTGTGGTGCGGAATTCAGGATATTTACTTTGAGGAAATCAGAGTGTTTCAAGCAGGCATCTGCCTTGAATA	99.6	Gonyaulacales	Ceratiaceae	Ceratium	0	0	0.5	0	0	0	0	0	0	0	0	0	0	0	0	0	0	0	0	0.5	0	3.6	1
OTU_3824	AGCCGCGGTAATTCCAGCTCCAATAGCGTATATTAAAGTTGTTGCGGTTAAAAAGCTCGTAGTTGGATTTCTGTCGAAGGAGACCGGTCCGCCCTCTGGGTGAGTATCTGGATCTCTTTGGACATCTTCTTGGGGAACGTATCTGCACTTCATTGTGCGGTGCGGTACTCAAGACTTTTACTTTGAGGAAATTAGAGTGTTCAAAGCAGGCCTACGCTCTGAATA	97.3	Peridiniales	Kryptoperidiniaceae	Unruhdinium	0	0	0	0	0	0.5	0	0	0	3.7	0	0	0	0	0	0	0	0	1.4	0	0	0	0
OTU_6181	AGCCGCGGTAATTCCAGCTCCAATAGCGTATATTAAAGTTGTTGCGGTTAAAAAGCTCGTAGTTTGACCTCTGCTCAGGTAGACTGGTCCGCCCTCTGGGTGAGCATCTGGCTTGGCCTGGGCATTTTCTTGTTGATCGCAGCTGCCCTTGACTGTGTGGTGCGGAATTCAGGACATTTACTTTGAGGAAATCAGAGTGTTTCAAGCAGGCATCTGCCTTGAATA	99.6	Gonyaulacales	Ceratiaceae	Ceratium	0	0	0	0	0	0	0	0	1.9	0	0	0	0	0	0	0	0	0	0	0	0	3.6	0
OTU_4413	AGCCGCGGTAATTCCAGCTCCAATAGCGTATATTAAAGTTGTTGCGGTTAAAAAGCTCGTAGTTTGACCTCTGCTCAGGTAGACTGGTCCGCTCTCTGGGTGAGCATCTGGCTTGGCCTGGGCATTTTCTTGGTGATCGCAGCTGCCCTTGACTGTGTGGTGCGGAATTCAGGACATTTACTTTGAGGAAATCAGAGTGTTTCAAGCAGGCATCTGCCTTGAATA	99.6	Gonyaulacales	Ceratiaceae	Ceratium	0	0	0.5	0	0	0	0	0	0	0	0	0.9	0	0.5	0	0	0	0	0	0	0	3.6	0
OTU_3689	AGCCGCGGTAATTCCAGCTCCAATAGCGTATATTAAAGTTGTTGCGGTTAAAAAGCTCGTAGTTTGACCTCTGCCCAGGTAGACTGGTCCGCCCTCTGGGTGAGCATCTGGCTTGGCCTGGGCATTTTCTTGGTGATCGCAGCTGCCCTTGACTGTGTGGTGCGGAATTCAGGACATTTACTTTGAGGAAATCAGAGTGTTTCAAGCAGGCATCTGCCTTGAATA	99.6	Gonyaulacales	Ceratiaceae	Ceratium	0	0	0	0	0	0	0	0	0	0	0	0	0	0	0	0	0.2	0	0	0.5	0	4.8	0
OTU_3777	AGCCGCGGTAATTCCAGCTCCAATAGCGTATATTAAAGTTGTTGCGGTTAAAAAGCTCGTAGTTGGATTTCTGTCGAAGGAGACCGGTCCGCCCTCTGGGTGAGTATCTGGATCTCTTTGGACATCTTCTTGGGGAACGTATCTGCACTTCATTGTGCGGTGCGGTACTCAAGACTTTTACTTTGAGTAAATTAGAGTGTTCAAAGCAGGCCTACGCTCTGAATA	96.9	Peridiniales	Kryptoperidiniaceae	Unruhdinium	0	0	0	0	0	0	0	0	0	3.7	0	0	0.5	0	0	0	0	0	0	0	0	1.2	0
OTU_4503	AGCCGCGGTAATTCCAGCTCCAATAGCGTATATTAAAGTTGTTGCGGTTAAAAAGCTCGTAGTTTGACCTCTGCTCAGGTAGACTGGTCCGCCCTCTGGGTGAGCATCTGGCTTGGCCTGGGCATTTTCTTGGTGATCGCAGCTGCCCTTGACTGTGTGGTGCGGAATTCAGGACATTTACTTTGAGGAAATCAGAGTGTTTCAAGCAGGCATCTGCCTTGAATT	100	Gonyaulacales	Ceratiaceae	Ceratium	0	0	0.5	0	0	0	0	1.3	0	0	0	0.9	0	0	0	0	0.2	0	0	0	0	2.4	0
OTU_4034	AGCCGCGGTAATTCCAGCTCCAATAGCGTATATTAAAGTTGTTGCGGTTAAAAAGCTCGTAGTTTGACCTCTGCTCAGGTAGACTGGTCCGCCCTCTGGGTGAGCATCTGGCTTGGCCTGGGCATTTTCTTGGTGATCGCAGCCGCCCTTGACTGTGTGGTGCGGAATTCAGGACATTTACTTTGAGGAAATCAGAGTGTTTCAAGCAGGCATCTGCCTTGAATA	99.6	Gonyaulacales	Ceratiaceae	Ceratium	0	0	0.5	0	0	0.5	0	0	0	0	0	0	0	0	0	0.5	0	0	0	0	1.5	2.4	0
OTU_5763	AGCCGCGGTAATTCCAGCTCCAATAGCGTATATTAAAGTTGTTGCGGTTAAAAGCTCGTAGTTTGACCTCTGCTCAGGTAGACTGGTCCGCCCTCTGGGTGAGCATCTGGCTTGGCCTGGGCATTTTCTTGGTGATCGCAGCTGCCCTTGACTGTGTGGTGCGGAATTCAGGACATTTACTTTGAGGAAATCAGAGTGTTTCAAGCAGGCATCTGCCTTGAATAA	100	Gonyaulacales	Ceratiaceae	Ceratium	0	0	0	0	0	0	0	0	0	0	1.5	0	0	0	0	0	0.2	0	0	0	0	3.6	0
OTU_5568	AGCCGCGGTAATTCCAGCTCCAATAGCGTATATTAAAGTTGTTGCGGTTAAAAAGCTCGTAGTTTGACCTCTGCTCAGGTAGACTGGTCCGCCCTCTGGGTGAGCATCTGGCTTGGCCTGGGCATTTTCTTGGTGATCGCAGCTGCACTTGACTGTGTGGTGCGGAATTCAGGACATTTACTTTGAGGAAATCAGAGTGTTTCAAGCAGGCATCTGCCTTGAATA	99.6	Gonyaulacales	Ceratiaceae	Ceratium	0	0	0	0	0	0	0	0	0	0	0	0	0	0	0	0	0	0	0	0.5	0	4.8	0
OTU_4428	AGCCGCGGTAATTCCAGCTCCAATAGCGTATATTAAAGTTGTTGCGGTTAAAAAGCTCGTAGTTTGACCTCTGCTCAGGTAGACTGGTCCGCCCTCTGGGTGAGCATCTGGCTTGGCCTGGGCATTTTCTTGGTGATCGCAGCTGCCCTTGACTGTGTGGTGCGGAATTCAGGACATTTACTTTGAGGAAATCAGAGTGTTTCAAGCAGGCATCTGCCTTGAATG	100	Gonyaulacales	Ceratiaceae	Ceratium	0	0	0	0	0	0.9	0	0	0	0.7	0	0	0	0	0	0	0	0	0	0	0	3.6	0
OTU_7472	AGCCGCGGTAATTCCAGCTCCAATAGCGTATATTAAAGTTGTTGCGGTTAAAAAGCTCGTAGTTTGACCTCTGCTCAGGTAGACTGGTCCGCCCTCTGGGTGAGCATCTGGCTTGGCCTGGGCATTTTCTTGGTGATCGCAGCTGCCCTTGACTGTGTGGTGCGGAATTCAGGACATTTACTTTGAGGAAATCAGAGTGTTTCAAGCAGGCATCTGACTTGAATA	99.6	Gonyaulacales	Ceratiaceae	Ceratium	0	0	0	0	1.6	0	0	0	0	0	0	0	0	0	0	0	0	0	0	0	0	3.6	0
OTU_7413	AGCCGCGGTAATTCCAGCTCCAATAGCGTATATTAAAGTTGTTGCGGTTAAAAAGCTCGTAGTTTGACCTCTGCTCAGGTAGACTGGTCCGCCCTCTGGGTGAGCATCTGGCTTGGCCTGGGCATTTTCTTGGTGATCGCAGCTGCCCTTGACTGTGTGGTGCGGAATTCAGGACATTTACTTTGAGGAAATCAGAGTGTTCCAAGCAGGCATCTGCCTTGAATA	99.6	Gonyaulacales	Ceratiaceae	Ceratium	0	0	0	0	1.6	0	0	0	0	0	0	0	0	0	0	0	0	0	0	0	0	3.6	0
OTU_3761	AGCCGCGGTAATTCCAGCTCCAATAGCGTATATTAAAGTTGTTGCGGTTAAAAAGCTCGTAGTTGGAATTCTGCTGAGGATGACCGGTCCGCCCTCTGGGCAGGTATCTGGCTCAGCTTTGGCATCTTCTTGGAAAATGTATCTGCACTTGACTGTGTGGTGCGGTATTCAAGACATTTACTTTGAGGAAATTAGAGTGTTTCAAGCAAGCAAAAGCTTTGAATA	100	Suessiales	Suessiales_X	Suessiales_XX	0	0	0	0	0	0	0	0	0	5.2	0	0	0	0	0	0	0	0	0	0	0	0	0
OTU_3960	AGCCGCGGTAATTCCAGCTCCAATAGCGTATATTAAAGTTGTTGCGGTTAAAAAGCTCGTAGTTTGACCTCTGCTCAGGTAGACTGGTCCGCCCTCTGGGTGAGCATCTGGCTTGGCCTGGGCATTTTCTTGGTGATCGCAGCTGCCCTTGACTGTGTGGTGCGGAATTCAGGACATTTACTTTGAGGAAATCAGAGTGTTTCAAGCAGGCATCCGCCTTGAATA	99.6	Gonyaulacales	Ceratiaceae	Ceratium	0	0	0	0	0	0	0	0	0	0	0	0	0	0	0.4	0	0	0	0	0	0	4.8	0
OTU_5581	AGCCGCGGTAATTCCAGCTCCAATAGCGTATATTAAAGTTGTTGCGGTTAAAAAGCTCGTAGTTTGACCTCTGCTCAGGTAGACTGGTCCGCCCTCTGGGTGAGCATCTGGCTTGGCCTGGGCATTTTCTTGGTGATCGCAGCTGCCCTGGACTGTGTGGTGCGGAATTCAGGACATTTACTTTGAGGAAATCAGAGTGTTTCAAGCAGGCATCTGCCTTGAATA	99.6	Gonyaulacales	Ceratiaceae	Ceratium	0	0	0	0	0	0	0	0	0	0	0	0	0	0	0.4	0	0	0	0	0	0	4.8	0
OTU_6003	AGCCGCGGTAATTCCAGCTCCAATAGCGTATATTAAAGTTGTTGCGGTTAAAAAGCTCGTAGTTGGATTTCTGCTGAGGACGACCGGTCCGCCCTCTGGGTGAGTATCTGGCTCGGCCTTGGCATCTTCTTGGAGAACGTTACTGCACTTGACTGTGTGGTGCGGTATCCAGGACTTTTACTTTGAGGAAATTAGAGTGTTTCAAGCAGGCGCACGCCTTGAATA	100	Dinophyceae_X	Dinophyceae_XX	Dinophyceae_XXX	0.7	2.6	0	0	0	0	0	0	1.9	0	0	0	0	0	0	0	0	0	0	0	0	0	0
OTU_5569	AGCCGCGGTAATTCCAGCTCCAATAGCGTATATTAAAGTTGTTGCGGTTAAAAAGCTCGTAGTTTGACCTCTGCTCAGGTAGACTGGTCCGCCCTCTGGGTGAGCATCTGGCTTGGCCTGGGCATTTTCTTGGTGATCGCAGCTGCCCTTGACTGTGTGGTGCGGAATTCAGGACATTTACTTTGAGGAAATCAGTGTGTTTCAAGCAGGCATCTGCCTTGAATA	99.6	Gonyaulacales	Ceratiaceae	Ceratium	0	0	0	0	0	0	0	0	0	0	0	0	0	0	0	0.5	0	0	0	0	0	3.6	1
OTU_4436	AGCCGCGGTAATTCCAGCTCCAATAGCGTATATTAAAGTTGTTGCGGTTAAAAAGCTCGTAGTTTGACCTCTGCTCAGGTAGACTGGTCCGCCCTCTGGGTGAGCATCTGGCTTGGCCTGGGCATTTTCTTGGTGATCGCAGCTGCCCTTGACTGTGTGGTGCGGAATTCAGGACATTTACTTTGAGGAAATCAGAGTGTTTCAAGCAGGCATCTGCCTCGAATA	99.6	Gonyaulacales	Ceratiaceae	Ceratium	0	0	0.5	0	0	0.9	0	0	0	0	0	0	0	0	0	0	0	0	0	0	0	3.6	0
OTU_5800	AGCCGCGGTAATTCTAGCTCCAATAGCGTATATTAAAGTTGTTGCGGTTAAAAAGCTCGTAGTTTGACCTCTGCTCAGGTAGACTGGTCCGCCCTCTGGGTGAGCATCTGGCTTGGCCTGGGCATTTTCTTGGTGATCGCAGCTGCCCTTGACTGTGTGGTGCGGAATTCAGGACATTTACTTTGAGGAAATCAGAGTGTTTCAAGCAGGCATCTGCCTTGAATA	99.6	Gonyaulacales	Ceratiaceae	Ceratium	0	0	0	0	0	0	0	0	0	0	0	0.9	0	0	0.4	0	0	0	1.4	0	0	2.4	0
OTU_5598	AGCCGCGGTAATTCCAGCTCCAATAGCGTATATTAAAGTTGTTGCGGTTAAAAAGCTCGTAGTTTGACATCTGCTCAGGTAGACTGGTCCGCCCTCTGGGTGAGCATCTGGCTTGGCCTGGGCATTTTCTTGGTGATCGCAGCTGCCCTTGACTGTGTGGTGCGGAATTCAGGACATTTACTTTGAGGAAATCAGAGTGTTTCAAGCAGGCATCTGCCTTGAATA	99.6	Gonyaulacales	Ceratiaceae	Ceratium	0	0	0	0	0	0	0	0	0	0	0	0	0	0.5	0	0	0	0	0	0	0	3.6	1
OTU_7406	AGCCGCGGTAATTCCAGCTCCAATAGCGTATATTAAAGTTGTTGCGGTTAAAAAGCTCGTAGTTTGACCTCTGCTCAGGTAGACTGGTCCGCCCTCTGGGTGAGCATCTGGCTTGGCCTGGGCATTTTCTTGGTGATCGCAGCTGCCCTTGACTGTGTGGTGCGGAATTCAGGACCTTTACTTTGAGGAAATCAGAGTGTTTCAAGCAGGCATCTGCCTTGAATA	99.6	Gonyaulacales	Ceratiaceae	Ceratium	0	0	0	0	0	0	0	0	0	0	0	0	0	0	0	0	0	0	1.4	0	0	3.6	0
OTU_7424	AGCCGCGGTAATTCCAGCTTCAATAGCGTATATTAAAGTTGTTGCGGTTAAAAAGCTCGTAGTTTGACCTCTGCTCAGGTAGACTGGTCCGCCCTCTGGGTGAGCATCTGGCTTGGCCTGGGCATTTTCTTGGTGATCGCAGCTGCCCTTGACTGTGTGGTGCGGAATTCAGGACATTTACTTTGAGGAAATCAGAGTGTTTCAAGCAGGCATCTGCCTTGAATA	99.6	Gonyaulacales	Ceratiaceae	Ceratium	0	0	0	0	1.6	0	0	0	0	0	0	0	0	0	0	0	0	0	0	0	0	2.4	1
OTU_4420	AGCCGCGGTAATTCCAGCTCCAATAGCGTATATTAAAGTTGTTGCGGTTAAAAAGCTCGTAGTTTGACCTCTGCTCAGGTAGACTGGTCCGCCCTCTGGGTGAGCATCTGGCTTGGCCTGGGCATTTTCTTGGTGATCGCAGCTGCCCTTGACTGTGTGGTGCGGAATTCAGGACATTTACTTTGAGGAAATCAGAGCGTTTCAAGCAGGCATCTGCCTTGAATA	99.6	Gonyaulacales	Ceratiaceae	Ceratium	0	0	0.5	0	0	0	0	0	0	0	0	0	0	0	0.4	0.5	0	0	0	0	0	3.6	0
OTU_4417	AGCCGCGGTAATTCCAGCTCCAATAGCGTATATTACAGTTGTTGCGGTTAAAAAGCTCGTAGTTTGACCTCTGCTCAGGTAGACTGGTCCGCCCTCTGGGTGAGCATCTGGCTTGGCCTGGGCATTTTCTTGGTGATCGCAGCTGCCCTTGACTGTGTGGTGCGGAATTCAGGACATTTACTTTGAGGAAATCAGAGTGTTTCAAGCAGGCATCTGCCTTGAATA	99.6	Gonyaulacales	Ceratiaceae	Ceratium	0	0	0.5	0	0	0	0	0	0	0	0	0	0	0.5	0.4	0	0	0	0	0	0	3.6	0
OTU_3293	AGCCGCGGTAATTCCAGCTCCAATAGCGTATATTAAAGTTGTTGCGGTTAAAAAGCTCGTAGTTGGGTTTCTGCTGAGGACGACCGGTCCGCCCTCTGGGTGAGTATCTGGCTCGGCCTGGGCATCTTCTTGGAGAACGTGGCTGCACTTGACTGTGTGGTGCGGTATCCAGGACTTTTACTTTGAGGAAATTAGAGTGTTTCAAGCAGGCACACGCCTTGAATA	99.6	Peridiniales	Thoracosphaeraceae	Naiadinium	0	0	0	0	0	0	0	0	1.9	0	0	0	0	0	0	0	0.9	0	0	0	0	1.2	1
OTU_8316	AGCCGCGGTAATTCCAGCTCCAATAGCGTATATTAAAGTTGTTGCGGTTAAAAAGCTCGTAGTTGGATTTCTGCCGAGGACGACCGTCCGACCCATACGGGTTTGTGACTGGTTAGACCGAGGCATCCTCTTGGAAGACGTGTTCCACTTAACTGTGGTCACGGAGTCCAGGACTTTTACTTTGAGGAAATTAGAGTGTTTCAAACAGGCTTACGCCGTGAATAC	100	Prorocentrales	Prorocentraceae	Prorocentrum	0	0	0	2	0	0	0	0	0	0	2.9	0	0	0	0	0	0	0	0	0	0	0	0
OTU_5567	AGCCGCGGTAATTCCAGCTCCAATAGCGTATATTAAAGTTGTTGCGGTTAAAAAGCTCGTAGTTTGACCTCTGCTCAGGTAGACTGGTCCGCCCTCTGGGTGAGCATCTGGCTTGGCCTGGGCATTTTCTTGGTGATCGCAGCTGCCCTTGACTGTGTGGTGCGGAATTCAGGACATTTACTTTGAGGAATTCAGAGTGTTTCAAGCAGGCATCTGCCTTGAATA	99.6	Gonyaulacales	Ceratiaceae	Ceratium	0	0	0	0	0	0	0	0	0	0	0	0.9	0	0	0	0	0.2	0	1.4	0	0	2.4	0
OTU_7416	AGCCGCGGTAATTCCAGCTCCAATAGCGTATATTAAAGTTGTTGCGGTTAAAAAGCTCGTAGTTTGACCTCTGCTCAGGTAGACTGGTCCGCCCTCTGGGTGAGCATCTGGCTTGGCCTGGGCATTTTCCTGGTGATCGCAGCTGCCCTTGACTGTGTGGTGCGGAATTCAGGACATTTACTTTGAGGAAATCAGAGTGTTTCAAGCAGGCATCTGCCTTGAATA	99.6	Gonyaulacales	Ceratiaceae	Ceratium	0	0	0	0	0	0	0	0	0	0	0	0.9	0	0	0.4	0	0	0	0	0	0	3.6	0
OTU_10799	AGCCGCGGTAATTCCAGCTCCAATAGCGTATATTAAAGTTGTTGCGGTTAAAAAGCTCGTAGTTGGATTTCTGCTTAGGTAGACTGGTCCGCCCTCTGGGTGAGCATCCGGCTTGGCCTGGGCATTTTCTTGGTGATCGCAGCTGCCCTTGACTGTGTGGTGTGGAACTCAGGACTTTTACTTTGAGGAAATCAGAGTGCTTCAAGCAGGTATCTGCCTTGAATA	98.2	Gonyaulacales	Ceratiaceae	Ceratium	0	0	0	0	4.9	0	0	0	0	0	0	0	0	0	0	0	0	0	0	0	0	0	0
OTU_5774	AGCCGCGGTAATTCCAGCTCCAATAGCGTATATTAAAGTTGTTGCGGTTAAAAAGCTCGTAGTTTGACCTCTGCTCAGGTAGACTGGTCCGCCCTCTGGGTGAGCATCTGGCTTGGCCTGGGCATTTTCTTGGTGATCGCAGCTGCCCTTGACTGTGTGGTGCGGAATTCAGGACATTTACTTTGAGGAAATCAGAGTGTTTCAAGTAGGCATCTGCCTTGAATA	99.6	Gonyaulacales	Ceratiaceae	Ceratium	0	0	0.5	0	0	0	0	0	0	0	1.5	0	0	0	0	0	0	0	0	0.5	0	2.4	0
OTU_7766	AGCCGCGGTAATTCCAGCTCCAATAGCGTATATTAAAGTTGTTGCGGTTAAAAAGCTCGTAGTTGGATTTCTGCCGAGGACGACCGACCGGCCCATACGGGTTTGCGTCTGGTTAGACCGAGGCATCCTCTTGGAAGACGTATGTACTTAACTGTACATGCGGAGTCCAGGACTTTTACTTTGAGGAAATTAGAGTGTTTCAAACAGGCTTTCGCCATGAATACA	95.5	Prorocentrales	Prorocentraceae	Prorocentrum	0	0	0	0	0	0.5	0	0	0	0	4.4	0	0	0	0	0	0	0	0	0	0	0	0
OTU_5756	AGCCGCGGTAATTCCAGCTCCAATAGCGTATATTAAAGTTGTTGCGGTTAAAAAGCTCGTAGTTTGACCTCTGCTCAGGTAGACTGGTCCGCCCTCTGGGTGAGCATCTGGCTTGGCCTGGGCATTTTCTTGGTGATCGCAGCTGCCCTTGACTGTGTGGTGCGGAATTTAGGACATTTACTTTGAGGAAATCAGAGTGTTTCAAGCAGGCATCTGCCTTGAATA	99.6	Gonyaulacales	Ceratiaceae	Ceratium	0	0	0	0	0	0	0	1.3	0	0.7	0	0	0	0	0.4	0	0	0	0	0	0	2.4	0
OTU_4563	AGCCGCGGTAATTCCAGCTCCAATAGCGTATATTAAAGTTGTTGCGGTTAAAAAGCTCGTAGTTGGATTTCTGTCGAAGGAGACCGGTCCGCCCTCTGGGTGAGTATCTGGATCTCTTTGGACATCTTCTTGGGGAACGTATCTGCACTTCATTGTGCGGTGCGGTACTCAAGACTTTTACTTTGAGGAAATTAGAGTGCTTAAAGCAGGCTATACGCCTGAATA	98.2	Peridiniales	Kryptoperidiniaceae	Unruhdinium	0	0	0	0	0	0	0	0	0	3	0	0.9	0	0	0	0	0	0	0	0	0	0	1
OTU_7430	AGCCGCGGTAATTCCAGCTCCAATAGCGTATATTAAAGTTGTTGCGGTTAAAAAGCTCGTAGTTTGACCTCTGCTCAGATAGACTGGTCCGCCCTCTGGGTGAGCATCTGGCTTGGCCTGGGCATTTTCTTGGTGATCGCAGCTGCCCTTGACTGTGTGGTGCGGAATTCAGGACATTTACTTTGAGGAAATCAGAGTGTTTCAAGCAGGCATCTGCCTTGAATA	99.6	Gonyaulacales	Ceratiaceae	Ceratium	0	0	0	0	0	0	0	0	0	0	0	0	0	0	0	0	0	0	0	0	0	4.8	0
OTU_7408	AGCCGCGGTAATTCCAGCTCCAATAGCGTATATTAAAGTTGTTGCGGTTAAAAAGCTCGTAGTTTGACCTCTGCTCAGGTAGACTGGTCCGCCCTCTGGGTGAGCATCTGGCTTGGCCTGGGCATTTTCTTGGTGATCGCAGCTGCCCTTGACTGTGTGGTGCGGAATTCAGGACATTTACTTTGAGGAAATCAGAGTGTTTCAAGCAGGCATTTGCCTTGAATA	99.6	Gonyaulacales	Ceratiaceae	Ceratium	0	0	0	0	0	0	0	0	0	0	0	0	0	0	0	0	0	0	0	0	0	4.8	0
OTU_7415	AGCCGCGGTAATTCCAACTCCAATAGCGTATATTAAAGTTGTTGCGGTTAAAAAGCTCGTAGTTTGACCTCTGCTCAGGTAGACTGGTCCGCCCTCTGGGTGAGCATCTGGCTTGGCCTGGGCATTTTCTTGGTGATCGCAGCTGCCCTTGACTGTGTGGTGCGGAATTCAGGACATTTACTTTGAGGAAATCAGAGTGTTTCAAGCAGGCATCTGCCTTGAATA	99.6	Gonyaulacales	Ceratiaceae	Ceratium	0	0	0	0	0	0	0	0	0	0	0	0	0	0	0	0	0	0	0	0	0	4.8	0
OTU_7421	AGCCGCGGTAATTCCAGCTCCAATAGCGTATATTAAAGTTGTTGCGGTTAAAAAGCTCGTAGTTTGACCTCTGCTCAGGTAGACTGGTCCGCCCTCTGGGTGAGCATCTGGCTTGGCCTGGGCATTTTCTTGGTGATCGCAGCTGCCCTTGACTGTGTGGTGCGGAATTCAGGACATTTACTTTTAGGAAATCAGAGTGTTTCAAGCAGGCATCTGCCTTGAATA	99.6	Gonyaulacales	Ceratiaceae	Ceratium	0	0	0	0	0	0	0	0	0	0	0	0	0	0	0	0	0	0	0	0	0	4.8	0
OTU_7420	AGCCGCGGTAATTCCAGCTCCAATAGCGTATATTAAAGTTGTTGCGGTTAAAAAGCTCGTAGTTTGACCTCTGCTCAGGTAGACTGGTCCGCCCTCTGGGTGAGCATCTGGCTTGGCCTGGGCATTTTCTTGGTGATCGCAGCTGCCCTTGACTGTGTGGTGCGGAATTCAGGACATTTACTTTGAGGAAATCAGAGTGTGTCAAGCAGGCATCTGCCTTGAATA	99.6	Gonyaulacales	Ceratiaceae	Ceratium	0	0	0	0	0	0	0	0	0	0	0	0	0	0	0	0	0	0	0	0	0	4.8	0
OTU_5566	ATCCGCGGTAATTCCAGCTCCAATAGCGTATATTAAAGTTGTTGCGGTTAAAAAGCTCGTAGTTTGACCTCTGCTCAGGTAGACTGGTCCGCCCTCTGGGTGAGCATCTGGCTTGGCCTGGGCATTTTCTTGGTGATCGCAGCTGCCCTTGACTGTGTGGTGCGGAATTCAGGACATTTACTTTGAGGAAATCAGAGTGTTTCAAGCAGGCATCTGCCTTGAATA	100	Gonyaulacales	Ceratiaceae	Ceratium	0	0	0	0	0	0	0	0	0	0.7	0	0	0	0	0.4	0	0	0	0	0	0	3.6	0
OTU_4046	AGCCGCGGCAATTCCAGCTCCAATAGCGTATATTAAAGTTGTTGCGGTTAAAAAGCTCGTAGTTGGATTTCTGTCGAAGGAGACCGGTCCGCCCTCTGGGTGAGTATCTGGATCTCTTTGGACATCTTCTTGGGGAACGTATCTGCACTTCATTGTGCGGTGCGGTACTCAAGACTTTTACTTTGAGGAAATTAGAGTGTTTCAAGCAGGCACACGCCTTGAATA	99.6	Peridiniales	Kryptoperidiniaceae	Unruhdinium	0	0	0	0	0	0.5	0	0	0	2.2	0	0	0.5	0	0	0	0	0	0	0	1.5	0	0
OTU_3123	AGCCGCGGTAATTCCAGCTCCAATAGCGTATATTAAAGTTGTTGCGGTTAAAAAGCTCGTAGTTGGATTTCTGCTGAGGATGACCGGTCCGCCCTCTGGGCAGGTATCTGGCTCAGCTTTGGCATCTTCTTGAAAAATGTATCTGCACTTGACTGTGTGGTGCGGTATTCAAGACATTTACTTTGAGGAAATTAGAGTGTTTCAAGCAAGCGAGTGCTTTGAATA	99.6	Suessiales	Suessiaceae	Asulcocephalium	0	0	0	0	0	3.2	0	0	0	0	1.5	0	0	0	0	0	0	0	0	0	0	0	0
OTU_4544	AGCCGCGGTAATTCCAGCTCCAATAGCGTATATTAAAGTTGTTGCGGTTAAAAAGCTCGTAGTTGGATTTCTGTCGAAGGAGACCGGTCCGCCCTCTGGGTGAGTATCTGGATCTCTTTGGACATCTTCTTGGGGGACGTATCTGCACTTCATTGTGCGGTGCGGTACTCAAGACTTTTACTTTGAGGAAATTAGAGTGTTTCAAGCAGGCACACGCCTTGAATA	99.6	Peridiniales	Kryptoperidiniaceae	Unruhdinium	0	0	0	0	0	0	0	0	0	3.7	0	0	0	0	0	0	0	0	0	0	0	0	1
OTU_5591	AGCCGCGGTAATTCCAGCTCCAATAGCGTATATTAAAGTTGTTGCGGTTAAAAAGCTCGTAGTTTGACCTCTGCTCAGGTAGACTGGTCCGCCCTCTGGGTGAGCATCTGGCTTGGCCTGGGCATTTTCTTGGTGATCGCAGCTGCCCTTGACTGTGTGGTGCGAAATTCAGGACATTTACTTTGAGGAAATCAGAGTGTTTCAAGCAGGCATCTGCCTTGAATA	99.6	Gonyaulacales	Ceratiaceae	Ceratium	0	0	0.5	0	0	0	0	0	0	0	0	0	0	0.5	0	0	0	0	0	0	0	3.6	0
OTU_5578	AGCCGCGGTAATTCCAGCTCCAATAGCGTATATTAAAGTTGTTGCGGTTAAAAAGCTCGTAGTTTGACCTCTGCTCAGGTAGACTGGTCCGCCCTCTGGGTGAGCATCTGGCTTGGCCTGGGCATTTTCTTGGTGATCGTAGCTGCCCTTGACTGTGTGGTGCGGAATTCAGGACATTTACTTTGAGGAAATCAGAGTGTTTCAAGCAGGCATCTGCCTTGAATA	99.6	Gonyaulacales	Ceratiaceae	Ceratium	0	0	0.5	0	0	0.5	0	0	0	0	0	0	0	0	0	0	0	0	0	0	0	3.6	0
OTU_7263	AGCCGCGGTAATTCCAGCTCCAATAGCGTATATTAAAGTTGTTGCGGTTAAAAAGCTCGTAGTTGGATTTCTGCCGAGGACGACCGGTCCGCCCTCTGGGTGTGCATCTGGCTCGGCCTGGGCATCTTCTTGGAGAACGTATCTGCGCTTCATTGTGTGGTGCGGTATCCAGGACCTTTACTTTGAGGAAATTAGAGTGTTTCAAGCAGGCACACGCCTTGAATA	98.7	Peridiniales	Thoracosphaeraceae	Thoracosphaeraceae_X	0	0	0	0	0	0	0	0	0	0	0	0	0	0	0	0	0	0	4.1	0.5	0	0	0
OTU_6182	AGCCGCGGTAATTCCAGCTCCAATAGCGTATATTAAAGTTGTTGCGGTTAAAAAGCTCGTAGTTTGACCTCTGCTCAGGTAGACTGGTCCGCCCTCTGGGTGAGCATCTGGCTTGGCCTGGGCATTTTCTTGATGATCGCAGCTGCCCTTGACTGTGTGGTGCGGAATTCAGGACATTTACTTTGAGGAAATCAGAGTGTTTCAAGCAGGCATCTGCCTTGAATA	99.6	Gonyaulacales	Ceratiaceae	Ceratium	0	0	0	0	0	0	0	0	1.9	0	0	0	0	0	0	0	0.2	0	0	0	0	2.4	0
OTU_5590	AGCCGCGGTAATTCCAGCTCCAATAGCGTATATTAAAGTTGTTGCGGTTAAAAAGCTCGTAGTTTGACCTCTGCTCAGGTAGACTGGTCCGCCCTCTGGGTGAGCATCTGGCTTGGCCTGGGCATTTTCTTGGTGATCGCAGCTGCCCTTGACTGTGTGGTGCGGAATTCAGGACATTTACTTTGAGGAGATCAGAGTGTTTCAAGCAGGCATCTGCCTTGAATA	99.6	Gonyaulacales	Ceratiaceae	Ceratium	0	0	0	0	0	0.9	0	0	0	0	0	0	0	0	0	0	0	0	0	0	0	3.6	0
OTU_7389	AGCCGCGGTAATTCCAGCTCCAATAGCGTATATTAAAGTTGTTGCGGTTAAAAAGCTCGTAGTTTGACCTCTGCTCAGGTAGACTGGTCCGCCCTCTGGGTGAGCATCTGGCTTGGCCTGGGCATGTTCTTGGTGATCGCAGCTGCCCTTGACTGTGTGGTGCGGAATTCAGGACATTTACTTTGAGGAAATCAGAGTGTTTCAAGCAGGCATCTGCCTTGAATA	99.6	Gonyaulacales	Ceratiaceae	Ceratium	0	0	0	0	0	0	0	0	0	0.7	0	0	0	0	0	0	0	0	1.4	0	0	2.4	0
OTU_5251	AGCCGCGGTAATTCCAGCTCCAATAGCGTATATTAAAGTTGTTGCGGTTAAAAAGCTCGTAGTTTGACCTCTGCTCAGGTAGACTGGTCCGCCCTCTGGGTGAGCATCTGGCTTGGCCTGGGCATTTTCTTGGTGATCGCAGCTGCCCTTGACTGTGTGGTGCGGAATTCAGGACATTTACTTTGAGGGAATCAGAGTGTTTCAAGCAGGCATCTGCCTTGAATA	99.6	Gonyaulacales	Ceratiaceae	Ceratium	0	0	0	0	0	0	0	0	0	0	0	0	0	0	0.7	0	0	0	1.4	0	0	2.4	0
OTU_4551	AGCCGCGGTAATTCCAGCTCCAATAGCGTATATTAAAGTTGTTGCGGTTAAAAAGCTCGTAGTTGGATTTCTGTCGAAGGAGACCGGTCCGCCCTCTGGGTGAGTATCTGGATCTCTTTGGACATCTTCTTGGGGAACGTATCTGCACTTCATTGTGCGGTGCGGTGCTCAAGACTTTTACTTTGAGGAAATTAGAGTGTTTCAAGCAGGCACACGCCTTGAATA	99.6	Peridiniales	Kryptoperidiniaceae	Unruhdinium	0	0	0	0	0	0	0	0	0	4.5	0	0	0	0	0	0	0	0	0	0	0	0	0
OTU_4565	AGCCGCGGTAATTCCAGCTCCAATAGCGTATATTAAAGTTGTTGCGGTTAAAAAGCTCGTAGTTGGATTTCTGTCGAAGGAGACCGGTCCGCCCTCTGGGTGAGTATCTGGATCTCTTTGGACATCTTCTTGGGGAACGTATCTGCACTTCATTTTGCGGTGCGGTACTCAAGACTTTTACTTTGAGGAAATTAGAGTGTTTCAAGCAGGCACACGCCTTGAATA	99.6	Peridiniales	Kryptoperidiniaceae	Unruhdinium	0	0	0	0	0	0	0	0	0	4.5	0	0	0	0	0	0	0	0	0	0	0	0	0
OTU_5564	AGCCGCGGTAATTCCAGCTCCAATAGCGTATATTAAAGTTGTTGCGGTTAAAAAGCTCGTAGTTTGACCTCTGCTCAGGTAGACTGGTCCGCCCTCTGGGTGAGCATCTGGCTTGGCCTGGGCATTTTCTTGGTGATCGCAGCTGCCCTTGACTGTGTGGTGCGGAATTCAGGACATTTACTTTGAGGAAATTAGAGTGTTTCAAGCAGGCATCTGCCTTGAATA	99.6	Gonyaulacales	Ceratiaceae	Ceratium	0	0	0	0	0	0	0	0	0	0	0	0	0	0	0.4	0	0	0	0	0.5	0	3.6	0
OTU_4562	AGCCGCGGTAATTCCAGCTCCAATAGCGTATATTAAAGTTGTTGCGGTTAAAAAGCTCGTAGTTGGATTTCTGTCGAAGGAGACCGGTCCGCCCTCTGGGTGAGTATCTGGATCTCTTTGGACATCTTCTTGGGGAACGTATCTGCACTTCATTGTGCGGTGCGGTACTCAAGACTTTTACTTTGAGGAAATTAGAGTGTTTCAAGCAGGCACACGCCTTGAATG	100	Peridiniales	Kryptoperidiniaceae	Unruhdinium	0	0	0	0	0	0	0	0	0	3	0	0.9	0.5	0	0	0	0	0	0	0	0	0	0
OTU_7387	AGCCGCGGTAATTCCAGCTCCAATAGCGTATATTAAAGTTGTTGCGGTTAAAAAGCTCGTAGTTTGACCTCTGCTCAGGTAGACTGGTCCGCCCTCTGGGTGAGCATCTGGCTTGGCCTGGGCATTTTCTTGGTGATCGCAGCTGCCCTTGACTGTGTGGTGAGGAATTCAGGACATTTACTTTGAGGAAATCAGAGTGTTTCAAGCAGGCATCTGCCTTGAATA	99.6	Gonyaulacales	Ceratiaceae	Ceratium	0	0	0	0	1.6	0	0	0	0	0	0	0	0	0	0.4	0	0	0	0	0	0	2.4	0
OTU_7463	AGCCGCGGTAATTCCAGCTCCAATAGCGTATATTAAAGTTGTTGCGGTTAAAAAGCTCGTAGTTTGACCTCTGCTCAGGTAGACTGGTCCGCCCTCTGGGTGAGCATCTGGCTTGGCCTGGGCATTTTCTTGGTGATCGCAGCTGCCCTTGACTGTGTGGTGCGGAATCCAGGACATTTACTTTGAGGAAATCAGAGTGTTTCAAGCAGGCATCTGCCTTGAATA	99.6	Gonyaulacales	Ceratiaceae	Ceratium	0	0	0	0	1.6	0	0	0	0	0	0	0	0	0	0.4	0	0	0	0	0	0	2.4	0
OTU_6439	AGCCGCGGTAATTCCAGCTCCAATAGCGTATATTAAAGTTGTTGCGGTTAAAAAGCTCGTAGTTTGACCTCTGCTCAGGTAGACTGGTCCGCCCTCTGGGTGAGCATCTGGCTTGGCCTGGGCATTTTCTTGGTGATCGCAGCGGCCCTTGACTGTGTGGTGCGGAATTCAGGACATTTACTTTGAGGAAATCAGAGTGTTTCAAGCAGGCATCTGCCTTGAATA	99.6	Gonyaulacales	Ceratiaceae	Ceratium	0	0	0	0	0	0	0	0	0	0	0	0	0	0	0	0.5	0	0	0	0	1.5	2.4	0
OTU_7381	AGCCGCGGTAATTCCAGCTCCAATAGCGTATATTAAAGTTGTTGCGGTTAAAAAGCTCGTAGTTTGACCTCTACTCAGGTAGACTGGTCCGCCCTCTGGGTGAGCATCTGGCTTGGCCTGGGCATTTTCTTGGTGATCGCAGCTGCCCTTGACTGTGTGGTGCGGAATTCAGGACATTTACTTTGAGGAAATCAGAGTGTTTCAAGCAGGCATCTGCCTTGAATA	99.6	Gonyaulacales	Ceratiaceae	Ceratium	0	0	0	0	0	0	0	0	0	0.7	0	0	0	0	0	0	0	0	0	0	0	3.6	0
OTU_6224	AGCCGCGGTAATTCCAGCTCCAATAGCGTATATTAAAGTTGTTGCGGTTAAAAAGCTCGTAGTTTGACCTCTGCTCAGGTAGACTGGTCCGCCCTCTGGGTGAGCATCTGGCTTGGCCTGGGCATCTTCTTGGTGATCGCAGCTGCCCTTGACTGTGTGGTGCGGAATTCAGGACATTTACTTTGAGGAAATCAGAGTGTTTCAAGCAGGCATCTGCCTTGAATA	99.6	Gonyaulacales	Ceratiaceae	Ceratium	0	0	0	0	0	0	0	0	1.9	0	0	0	0	0	0	0	0	0	0	0	0	2.4	0
OTU_5559	AGCCGCGGTAATTCCAGCTCCAATAGCGTATATTAAAGTTGTTGCGGTTAAAAAGCTCGTAGTTTGACCTCTGCTCAGGTAGACTGGTCCGCACTCTGGGTGAGCATCTGGCTTGGCCTGGGCATTTTCTTGGTGATCGCAGCTGCCCTTGACTGTGTGGTGCGGAATTCAGGACATTTACTTTGAGGAAATCAGAGTGTTTCAAGCAGGCATCTGCCTTGAATA	99.6	Gonyaulacales	Ceratiaceae	Ceratium	0	0	0	0	0	0	0	0	0	0	0	0	0	0.9	0	0	0	0	0	0	0	2.4	1
OTU_5579	AGCCGCGGTAATTCCAGCTCCAATAGCGTATATTAAAGTTGTTGCGGTTAAAAAGCTCGTAGTTTGACCTCTGCTCAGGTAGACTGGTCCGCCCTCTGGGTGAGCATCTGGCTTGGCCTGGGCATTTTCTTGGTGATCGCAGCTGCCCTTGACTGTGTGGTGCGGAATTCAGGACATTTACTTTGAGGAAATCAGAGTGTTTCAAGCAGGCATCTACCTTGAATA	99.6	Gonyaulacales	Ceratiaceae	Ceratium	0	0	0.5	0	0	0.5	0	0	0	0	0	0.9	0	0	0	0	0	0	0	0	0	2.4	0
OTU_4432	AGCCGCGGTAATTCCAGCTCCAATAGCGTATATTAAAGTTGTTGCGGTTAAAAAGCTCGTAGTTTGACCTCTGCTCAGGTAGACTGGTCCGCCCTCTGAGTGAGCATCTGGCTTGGCCTGGGCATTTTCTTGGTGATCGCAGCTGCCCTTGACTGTGTGGTGCGGAATTCAGGACATTTACTTTGAGGAAATCAGAGTGTTTCAAGCAGGCATCTGCCTTGAATA	99.6	Gonyaulacales	Ceratiaceae	Ceratium	0	0	0	0	0	0.5	0	0	0	0	0	0	0	0.5	0	0.5	0	0	0	0.5	0	2.4	0
OTU_7481	AGCCGCGGTAATTCCAGCTCCAATAGCGTATATTAAAGTTGTTGCGGTTAAAAAGCTCGTAGTTGGATTTCTGCGTAGGACGACTGGTCCGCCCTCTGGGTGAGCATCTGGGTCAGCCTGTGCATCCTCGTGGAGAACGCAGCTGCACTTGATTGTGTGGTGTGGTATCTGCGACTTTTATTTTGAGGAAATTAGAGTGTTTCAAGCAGGTATGCGCCTGAATAC	98.7	Dinophyceae_X	Tovelliaceae	Woloszynskia	0	0	1	0	3.3	0	0	0	0	0	0	0	0	0	0	0	0	0	0	0	0	0	0
OTU_8802	AGCCGCGGTAATTCCAGCTCCAATAGCGTATATTAAAGTTGTTGCGGTTAAAAAGCTCGTAGTTGGATTTCTGTCGAAGGAGACCGGTCCGCCCTCTGGGTGAGTATCTGGATCTCTTTGGACATCTTCTTGGGGAACGTATCTGCACTTCATTGTGCGGTGCGGTACTCAAGACTTTTACTTTGAGGAAATTAGAGTGTTTCAAGCAGGTACACGCCTTGAATA	99.6	Peridiniales	Kryptoperidiniaceae	Unruhdinium	0	0	0	2	0	0	0	0	0	0.7	0	0	0	0	0	0	0	0	0	0	1.5	0	0
OTU_7401	AGCCGCGGTAATTCCAGCTCCAATAGCGTATATTAAAGTTGTTGCGGTTAAAAAGCTCGTAGTTTGACCTCTGCTCAGGTAGACTGGTCCGCCCTCTGGGTGAGCATCTGGCTTGGCCTGGGCATTTTCTTGGTGATCGCAGCTGCCCTTGACTGTGTGGTGCGGAATTCAGGACATTTACTTTGAGGAAATCTGAGTGTTTCAAGCAGGCATCTGCCTTGAATA	99.6	Gonyaulacales	Ceratiaceae	Ceratium	0	0	0	0	1.6	0	0	0	0	0	0	0	0	0	0	0	0.2	0	0	0	0	2.4	0
OTU_7774	AGCCGCGGTAATTCCAGCTCCAATAGCGTATATTAAAGTTGTTGCGGTTAAAAAGCTCGTAGTTTGACCTCTGCTCAGGTAGACTGGTCCGCCCTCTGGGTGAGCATCTGGCTTGGCCTGGGCATTTTCTTGGTGATCGCAGCTGCCCTTGACTGTGTGGTGCGGAATTCAGGACATTTACTTTGAGGAAATCAGAGTGTTTCAAGCAGGCATCTGCCTTGCATA	99.6	Gonyaulacales	Ceratiaceae	Ceratium	0	0	0	0	0	0	0	0	0	0	1.5	0	0	0	0.4	0	0	0	0	0	0	2.4	0
OTU_4545	AGCCGCGGTAATTCCAGCTCCAATAGCGTATATTAAAGTTGTTGCGGTTAAAAAGCTCGTAGTTGGATTTCTGTCGAAGGAGACCGGTCCGCCCTCTGGGTGAGTATCTGGATCTCTTTGGACATCTTCTTGGGGAACGTATCTGCACTTCATTGTGCGGTGCGGTACTCAAGACTTTTACTTTGAGAAAATTAGAGTGCTTAAAGCAGGCTATACGCCTGAATA	97.8	Peridiniales	Kryptoperidiniaceae	Unruhdinium	0	0	0	0	0	0	0	0	0	3	0	0.9	0	0	0.4	0	0	0	0	0	0	0	0
OTU_4963	AGCCGCGGTAATTCCAGCTCCAATAGCGTATATTAAAGTTGTTGCGGTTAAAAAGCTCGTAGTTGGATTTCTGTCGAAGGAGACCGGTCCGCCCTCTGGGTGAGTATCTGGATCTCTTTGGACATCTTCTTGGGGAACGTATCTGTACTTCATTGTGCGGTGCGGTACTCAAGACTTTTACTTTGAGGAAATTAGAGTGTTTCAAGCAGGCACACGCCTTGAATA	99.6	Peridiniales	Kryptoperidiniaceae	Unruhdinium	0	0	0	0	0	0	0	0	0	2.2	0	0	0	0	0	0.5	0	0	0	0	1.5	0	0
OTU_5727	AGCCGCGGTAATTCCAGCTCCAATAGCGTATATTAAAGTTGTTGCGGTTAAAAAGCTCGTAGTTTGACCTCTGCTCAGGTAGACTGGTCCGCCCTCTGGGTGAGCATCTGGCTTGGCCTGGGCATTTTCTTGGTGATCGCAGCTGCCCTTGACTGTGTGGTGCGGAATTCAGGACATTACTTTGAGGAAATCAGAGTGTTTCAAGCAGGCATCTGCCTTGAATAA	100	Gonyaulacales	Ceratiaceae	Ceratium	0	0	0.5	0	1.6	0	0	0	0	0	0	0	0	0	0.4	0.5	0	0	0	0	0	1.2	0
OTU_4520	AGCCGCGGTAATTCCAGCTCCAATAGCGTATATTAAAGTTGTTGCGGTTAAAAAGCTCGTAGTTTGACCTCTGCTCAGGTAGACTGGTCCGCCCTCTGGGTGAGCATCTGGCTTGGCCTGGGCATTTTCTTGGTGATCGCAGCTGCCCTTGACTGTGTGGTGCGGAATTCAGGACGTTTACTTTGAGGAAATCAGAGTGTTTCAAGCAGGCATCTGCCTTGAATA	99.6	Gonyaulacales	Ceratiaceae	Ceratium	0	0	0.5	0	0	0.5	0	0	0	0.7	0	0.9	0	0	0.4	0	0	0	0	0	0	1.2	0
OTU_5432	AGCCGCGGTAATTCCAGCTCCAATAGCGTATATCAAAGTTGTTGCGGTTAAAAAGCTCGTAGTTTGACCTCTGCTCAGGTAGACTGGTCCGCCCTCTGGGTGAGCATCTGGCTTGGCCTGGGCATTTTCTTGGTGATCGCAGCTGCCCTTGACTGTGTGGTGCGGAATTCAGGACATTTACTTTGAGGAAATCAGAGTGTTTCAAGCAGGCATCTGCCTTGAATA	99.6	Gonyaulacales	Ceratiaceae	Ceratium	0	0	0	0	0	0	0	1.3	0	0	0	0	0	0	0	0	0.4	0	0	0	0	2.4	0
OTU_4558	AGCCGCGGTAATTCCAGCTCCAATAGCGTATATTAAAGTTGTTGCGGTTAAAAAGCTCGTAGTTGGATTTCTGTCGAAGGAGACCGGTCCGCCCTCTGGGTGGGTATCTGGATCTCTTTGGACATCTTCTTGGGGAACGTATCTGCACTTCATTGTGCGGTGCGGTACTCAAGACTTTTACTTTGAGGAAATTAGAGTGTTTCAAGCAGGCACACGCCTTGAATA	99.6	Peridiniales	Kryptoperidiniaceae	Unruhdinium	0	0	0	0	0	0.5	0	0	0	3.7	0	0	0	0	0	0	0	0	0	0	0	0	0
OTU_7384	AGCCGCGGTAATTCCAGCTCCAATAGCGTATATTAAAGTTGTTGCGGTTAAAAAGCTCGTAGTTTGACCTCTGCTCAGGTAGACTGATCCGCCCTCTGGGTGAGCATCTGGCTTGGCCTGGGCATTTTCTTGGTGATCGCAGCTGCCCTTGACTGTGTGGTGCGGAATTCAGGACATTTACTTTGAGGAAATCAGAGTGTTTCAAGCAGGCATCTGCCTTGAATA	99.6	Gonyaulacales	Ceratiaceae	Ceratium	0	0	0	0	0	0	0	0	0	0	0	0	0.5	0	0	0	0	0	0	0	0	3.6	0
OTU_5804	AGCCGCGGTAATTCCAGCTCCAATAGCGTATATTAAAGTTGTTGCGGTTAAAAAGCTCGTAGTTGGATTTCTGCCGAGGACGACCGACCGACCCGTATGGGTTTGCGTCTGGTTAGACCGAGGCATCCTCTTGGAAGACGTGATCCGATTCATTTCGGACACGGAGTCCAGGACATTTACTTTGAGGAAATTAGAGTGTTTCAAACAGGCGTTTGCCGTGAATAC	96	Prorocentrales	Prorocentraceae	Prorocentrum	0	0	0	0	0	0	0	0	0	0	0	3.6	0.5	0	0	0	0	0	0	0	0	0	0
OTU_7414	AGCCGCGGTACTTCCAGCTCCAATAGCGTATATTAAAGTTGTTGCGGTTAAAAAGCTCGTAGTTTGACCTCTGCTCAGGTAGACTGGTCCGCCCTCTGGGTGAGCATCTGGCTTGGCCTGGGCATTTTCTTGGTGATCGCAGCTGCCCTTGACTGTGTGGTGCGGAATTCAGGACATTTACTTTGAGGAAATCAGAGTGTTTCAAGCAGGCATCTGCCTTGAATA	99.6	Gonyaulacales	Ceratiaceae	Ceratium	0	0	0.5	0	0	0	0	0	0	0	0	0	0	0	0	0	0	0	0	0	0	3.6	0
OTU_10316	AGCCGCGGTAATTCCAGCTCCAATAGCGTATATTAAAGTTGTTGCGGTTAAAAAGCTCGTAGTTGGATTTCTGTTCAGGACGACCGGTCCGCCCTCCGGGTGAGCATCTGGTTCGGCCTGGGCATCTTCTTGGAGAACGTCGCTGCACTTGACTGTGTGGTGCGGTATCCAGGACTTTTACTTTGAGGAAATTAGAGTGTTTCAAGCAGGCCCACGCCTTGAATA	97.8	Peridiniales	Peridiniopsidaceae	Parvodinium	0	0	0	0	0	0	0	0	0	0	0	0	0	0	0	0	0	0	4.1	0	0	0	0
OTU_5740	AGCCGCGGTAATTCCAGCTCCAATAGCGTATATTAAAGTTGTTGCGGTTAAAAAGCTCGTAGTTGGATTTCTGTCGAAGGAGACCGGTCCGCCCTCTGGGTGAGTATCTGGATCTCTTTGGACATCTTCTTGGGGAACGTATCTGCACTTCATTGTGCGGTGCGGCACTCAAGACTTTTACTTTGAGGAAATTAGAGTGTTTCAAGCAGGCACACGCCTTGAATA	99.6	Peridiniales	Kryptoperidiniaceae	Unruhdinium	0	0	0	0	0	0	0	0	0	2.2	0	0.9	0	0	0	0	0	0	0	0	0	0	1
OTU_7418	AGCCGCGGTAATTCCAGCTCCAATAGCGTATATTAAAGTTGTTGCGGTTAAAAAGCTCGTAGTTTGACCTCTGCTCAGGTAGACTGGTCCGCCCTCTGGGTGAGCATCTGGCTTGGCCTGGGCATTTTCTTGGTGATCGCAGCTGCCCTTGACTGTGTGGTGCGGAATTCAGGCCATTTACTTTGAGGAAATCAGAGTGTTTCAAGCAGGCATCTGCCTTGAATA	99.6	Gonyaulacales	Ceratiaceae	Ceratium	0	0	0	0	0	0	0	0	0	0	0	0	0	0	0	0	0	0	0	0.5	0	3.6	0
OTU_8422	AGCCGCGGTAATTCCAGCTCCAATAGCGTATATTAAAGTTGTTGCGGTTAAAAAGCTCGTAGTTTGACCTCTGCTCAGGTAGACTGGTCCGCCCTCTGGGTGAGCATCTGGCTTGGCCTGGGCATTTTCTTGGTGATCGCAGCTGCCCTTGACTGTGTGGTGCGGAATTCAGGACATTTACTTTGAGGAAATCAGAGTGTTTCAAGCAGGCGTCTGCCTTGAATA	99.6	Gonyaulacales	Ceratiaceae	Ceratium	0	0	0	0	0	0	0	0	1.9	0	0	0	0	0	0	0	0	0	0	0	0	1.2	1
OTU_7431	AGCCGCGGTAATTCCAGCTCCAATAGCGTATATTAAAGTTGTTGCGGTTAAAAAGCTCGTAGTTTGACCTCTGCTCAGGTAGATTGGTCCGCCCTCTGGGTGAGCATCTGGCTTGGCCTGGGCATTTTCTTGGTGATCGCAGCTGCCCTTGACTGTGTGGTGCGGAATTCAGGACATTTACTTTGAGGAAATCAGAGTGTTTCAAGCAGGCATCTGCCTTGAATA	99.6	Gonyaulacales	Ceratiaceae	Ceratium	0	0	0	0	0	0.5	0	0	0	0	0	0	0	0	0	0	0	0	0	0	0	3.6	0
OTU_6753	AGCCGCGGTAATTCCAGCTCCAATAGCGTATATTAAAGTTGTTGCAGTTAAAAAGCTCGTAGTTGGATTTCTGCTCAGGTAGACTGGTCCGCCCTCTGGGTGAGCATCTGGCTTGGCCTGGGCATTTTCTTGGTGATCGCAGCTGCCCTTGACTGTGTGGTGCGGAATTCAGGACATTTACTTTGAGGAAATCAGAGTGTTTCAAGCAGGCATCTGCCTTGAATA	98.2	Gonyaulacales	Ceratiaceae	Ceratium	0	0	0	0	0	0	0	0	0	0	1.5	0.9	0	0.5	0	0	0	0	0	0	0	1.2	0
OTU_10591	AGCCGCGGTAATTCCAGCTCCAATAGCGTATATTAAAGTTGTTGCGGTTAAAAAGCTCGTAGTTTGACCTCTGCTCAGGTAGACTGGTCCGCCCTCTGGGTGAGCATCTGGCTTGGCCTGGGCATTTTCTTGGTGATCGCAGCTGCCCTTGACTGTGTGGTGCGGAATTCAGGACATTTACTTTGAGGAAATCAGAGTGTTTCAAGCAGGCAAATGCCTTGAATA	99.1	Gonyaulacales	Ceratiaceae	Ceratium	0	0	0	0	1.6	0	0	0	0	0	0	0	0	0	0	0	0	0	0	0	0	2.4	0
OTU_10804	AGCCGCGGTAATTCCAGCTCCAATAGCGTATATTAAAGGTGTTGCGGTTAAAAAGCTCGTAGTTTGACCTCTGCTCAGGTAGACTGGTCCGCCCTCTGGGTGAGCATCTGGCTTGGCCTGGGCATTTTCTTGGTGATCGCAGCTGCCCTTGACTGTGTGGTGCGGAATTCAGGACATTTACTTTGAGGAAATCAGAGTGTTTCAAGCAGGCATCTGCCTTGAATA	99.6	Gonyaulacales	Ceratiaceae	Ceratium	0	0	0	0	1.6	0	0	0	0	0	0	0	0	0	0	0	0	0	0	0	0	2.4	0
OTU_7394	AGCCGCGGTAATTCCAGCTCCAATAGCGTATATTAAAGTTGTTGCGGTTAAAAAGCTCGTAGTTTGACCTCTGCTCAGGTAGACTGGTCCGCCCTCTGGGTGAGCATCTGGCTTGGCCTGGGCATTTTCTTGGTGATCGCAGCTGCCCTTGACTGTGTGGTGCGGAATTCAGGACATTTACTTTGAGGAAATCAGAGTGTTTCAAGCAGACATCTGCCTTGAATA	99.6	Gonyaulacales	Ceratiaceae	Ceratium	0	0	0	0	0	0	0	0	0	0	0	0	0	0	0.4	0	0	0	0	0	0	3.6	0
OTU_10629	AGCCGCGGTAATTCCAGCTCCAATAGCGTATATTAAAGTTGTTGCGGTTAAAAAGCTCGTAGTTTGACCTCTGCTCAGGTAGACTGGTCCGCCCTCTGGGTGAGCATCTGGCTTGGCCTGGGCATTTTCTTGGTGATCGCAGCTGCCCTTGACTGTGTGGTGCGGAATTCCGGACATTTACTTTGAGGAAATCAGAGTGTTTCAAGCAGGCATCTGCCTTGAATA	99.6	Gonyaulacales	Ceratiaceae	Ceratium	0	0	0	0	0	0	0	1.3	0	0	0	0	0	0	0	0	0	0	1.4	0	0	1.2	0
OTU_5746	AGCCGCGGTAATTCCAGCTCCAATAGCGTATATTAAAGTTGTTGCGGTTAAAAAGCTCGTAGTCGGATTTCTGTCGAAGGAGACCGGTCCGCCCTCTGGGTGAGTATCTGGATCTCTTTGGACATCTTCTTGGGGAACGTATCTGCACTTCATTGTGCGGTGCGGTACTCAAGACTTTTACTTTGAGGAAATTAGAGTGTTTCAAGCAGGCACACGCCTTGAATA	99.6	Peridiniales	Kryptoperidiniaceae	Unruhdinium	0	0	0	0	0	0	0	0	0	3	0	0.9	0	0	0	0	0	0	0	0	0	0	0
OTU_5745	AGCCGCGGTAATTCCAGCTCCAATAGCGTATATTAAAGTTGTTGCGGTTAAAAAGCTCGTAGTTGGATTTCTGTCGAAGGAGACCGGTCCGCCCTCTGGGTGAGTATCTGGATCTCTTTGGACATCTTCTTGGGGAACGTATCTGCACTTCATTGTGCGGTGCGGTACCCAAGACTTTTACTTTGAGGAAATTAGAGTGTTTCAAGCAGGCACACGCCTTGAATA	99.6	Peridiniales	Kryptoperidiniaceae	Unruhdinium	0	0	0	0	0	0	0	0	0	3	0	0.9	0	0	0	0	0	0	0	0	0	0	0
OTU_5802	AGCCGCGGTAATTCCAGCTCCAATAGCGTATATTAAAGTTGTTGCGGTTAAAAAGCTCGTAGTTGGATTTCTGTCGAAGGAGACCGGTCCGCCCTCTGGGTGAGTATCTGGATCTCTTTGGACATCTTCTTGGGGAACGTATCTGCACTTCATTGTGCGGTGCGGTACTCAAGACTTTTACTTTGAGGAAATTAGAGTGTTTCAGGCAGGCACACGCCTTGAATA	99.6	Peridiniales	Kryptoperidiniaceae	Unruhdinium	0	0	0	0	0	0	0	0	0	3	0	0.9	0	0	0	0	0	0	0	0	0	0	0
OTU_8890	AGCCGCGGTAATTCCAGCTCCAATAGCGTATATTAAAGTTGTTGCGGTTAAAAAGCTCGTAGTTGGATTTCTGTCGAAGGAGACCGGTCCGCCCTCTGGGTGAGTATCTGGATCTCTTTGGACATCTTCTTGGGGAACATATCTGCACTTCATTGTGCGGTGCGGTACTCAAGACTTTTACTTTGAGGAAATTAGAGTGTTTCAAGCAGGCACACGCCTTGAATA	99.6	Peridiniales	Kryptoperidiniaceae	Unruhdinium	0	0	0	0	1.6	0	0	0	0	0.7	0	0	0	0	0	0	0	0	0	0	1.5	0	0
OTU_7395	AGCCGCGGTAATTCCAGCTCCAATAGCGTATATTAAAGTTGTTGCGGTTAAAAAGCTCGTAGTTTGACCTCTGCTCAGGTAGACTGGTCCGCCCTCTGGGTGAGCATCTGGCTCGGCCTGGGCATTTTCTTGGTGATCGCAGCTGCCCTTGACTGTGTGGTGCGGAATTCAGGACATTTACTTTGAGGAAATCAGAGTGTTTCAAGCAGGCATCTGCCTTGAATA	99.6	Gonyaulacales	Ceratiaceae	Ceratium	0	0	0	0	0	0	0	0	0	0	0	0	0	0	0	0	0.2	0	0	0	0	3.6	0
OTU_7435	AGCCGCGGTAATTCCAGCTCCAATAGCGTATATTAAAGTTGTTGCGGTTAAAAAGCTCGTAGTTTGACCTCTGCTCAGGTAGACTGGTCCGCCCTCTGGGTGAGCATCTGGCTTGGCCTGGGCATTTTCTTGGTGATCGCAGCTGCCCTTGACTGTGTGGTGCGGAATTCAGGACATTTACTTTGAGGAAATCAGAGTGTTTCAAGCATGCATCTGCCTTGAATA	99.6	Gonyaulacales	Ceratiaceae	Ceratium	0	0	0	0	0	0	0	0	0	0	0	0	0	0.5	0	0	0	0	0	0	0	2.4	1
OTU_7417	CGCCGCGGTAATTCCAGCTCCAATAGCGTATATTAAAGTTGTTGCGGTTAAAAAGCTCGTAGTTTGACCTCTGCTCAGGTAGACTGGTCCGCCCTCTGGGTGAGCATCTGGCTTGGCCTGGGCATTTTCTTGGTGATCGCAGCTGCCCTTGACTGTGTGGTGCGGAATTCAGGACATTTACTTTGAGGAAATCAGAGTGTTTCAAGCAGGCATCTGCCTTGAATA	100	Gonyaulacales	Ceratiaceae	Ceratium	0	0	0	0	0	0	0	0	0	0	0	0.9	0	0.5	0	0	0	0	0	0	0	2.4	0
OTU_10553	AGCCGCGGTAATTCCAGCTCCAATAGCGTATATTAAAGTTGTTGCGGTTAAAAAGCTCGTAGTTTGACCTCTGCTCAGGTAGACTGGTCCGCCCTCTGGGTGAGCATCTGGCTTGGCCTGGGCATTTTCTTGGAGATCGCAGCTGCCCTTGACTGTGTGGTGCGGAATTCAGGACATTTACTTTGAGGAAATCAGAGTGTTTCAAGCAGGCATCTGCCTTGAATA	99.6	Gonyaulacales	Ceratiaceae	Ceratium	0	0	0	0	0	0	0	0	0	0	0	0	0	0	0	0	0	0	1.4	0	0	2.4	0
OTU_10314	AGCCGCGGTAATTCCAGCTCCAATAGCGTATATTAAAGTTGTTGCGGTTAAAAAGCTCGTAGTTTGACCTCTGCTCAGGTAGACTGGTCCGCCCTCTGGGTGAGCATCTGGCTTGGCCTGGGCATTTTCTTGGTGATCGCAGCTGCCCTTGACTGTGTGGTGCGGAATTCAGGACATTTACTTTGAGGAAATCAGAGTGTTTCAAGCAGGCATCTGCCTTGATTA	100	Gonyaulacales	Ceratiaceae	Ceratium	0	0	0	0	0	0	0	0	0	0	0	0	0	0	0	0	0	0	1.4	0	0	2.4	0
OTU_4098	AGCCGCGGTAATTCCAGCTCCAATAGCGTATATTAAAGTTGTTGCGGTTAAAAAGCTCATAGTTGGATTTCTGCATAGGATGACTGGTCCGCCCTCTGGGTGAGTATCTGGGTCAGCCTCTGCATCTTCATGGAGAACGCAGCTGCACTTGATTGTGTGGTGCGGTATCTGTGACCTTTACTTTGAGGAAATTAGAGTGTTTCAAGCAGGTACGTGCCTGAATAC	99.1	Dinophyceae_X	Tovelliaceae	Tovellia	0	0	0	0	0	0	0.5	0	0	0	0	0	0	0	0	0	0	0	1.4	1.9	0	0	0
OTU_8803	AGCCGCGGTAATTCCAGCTCCAATAGCGTATATTAAAGTTGTTGCGGTTAAAAAGCTCGTAGTTGGATTTCTGTCGAAGGAGACCGGTCCGCCCTCTGGGTGAGTATCTGGATCTCTTTGGACATCTTCTTGGGGAACGTATCTGCACTTCATTGTGCGGTGCAGTACTCAAGACTTTTACTTTGAGGAAATTAGAGTGTTTCAAGCAGGCACACGCCTTGAATA	99.6	Peridiniales	Kryptoperidiniaceae	Unruhdinium	0	0	0	0	0	0	0	0	0	0.7	0	0	0	0	0	0	0	0	0	0	3	0	0
OTU_8935	AGCCGCGGTAATTCCAGCTCCAATAGCGTATATTAAAGTTGTTGCGGTTAAAAAGCTCGTAGTTGGATTTCTATCGAAGGAGACCGGTCCGCCCTCTGGGTGAGTATCTGGATCTCTTTGGACATCTTCTTGGGGAACGTATCTGCACTTCATTGTGCGGTGCGGTACTCAAGACTTTTACTTTGAGGAAATTAGAGTGTTTCAAGCAGGCACACGCCTTGAATA	99.6	Peridiniales	Kryptoperidiniaceae	Unruhdinium	0	0	0	0	0	0	0	0	0	0.7	0	0	0	0	0	0	0	0	0	0	3	0	0
OTU_6338	AGCCGCGGTAATTCCAGCTCCAATAGCGTATATTAAAGTTGTTGCGGTTAAAAAGCTCGTAGTTGGATTTCTGTCGAAGGAGACCGGTCCGCCCTCTGGGTGAGTATCTGGATCTCTTTGGACATCTTCTTGGGGAACGTATCTGCACTTCATTGTGCGGTGCGGTACTCAAGACTTCTACTTTGAGGAAATTAGAGTGTTTCAAGCAGGCACACGCCTTGAATA	99.6	Peridiniales	Kryptoperidiniaceae	Unruhdinium	0	0	0	0	0	0	0	0	0	2.2	0	0	0	0	0	0	0	0	0	0	1.5	0	0
OTU_6367	AGCCGCGGTAATTCCAGCTCCAATAGCGTATATTAAAGTTGTTGCGGTTAAAAAGCTCGTAGTTGGATTTCTGTCGAAGGGGACCGGTCCGCCCTCTGGGTGAGTATCTGGATCTCTTTGGACATCTTCTTGGGGAACGTATCTGCACTTCATTGTGCGGTGCGGTACTCAAGACTTTTACTTTGAGGAAATTAGAGTGTTTCAAGCAGGCACACGCCTTGAATA	99.6	Peridiniales	Kryptoperidiniaceae	Unruhdinium	0	0	0	0	0	0	0	0	0	2.2	0	0	0	0	0	0	0	0	0	0	1.5	0	0
OTU_6377	AGCCGCGGTAATTCCGGCTCCAATAGCGTATATTAAAGTTGTTGCGGTTAAAAAGCTCGTAGTTGGATTTCTGTCGAAGGAGACCGGTCCGCCCTCTGGGTGAGTATCTGGATCTCTTTGGACATCTTCTTGGGGAACGTATCTGCACTTCATTGTGCGGTGCGGTACTCAAGACTTTTACTTTGAGGAAATTAGAGTGTTTCAAGCAGGCACACGCCTTGAATA	99.6	Peridiniales	Kryptoperidiniaceae	Unruhdinium	0	0	0	0	0	0	0	0	0	2.2	0	0	0	0	0	0	0	0	0	0	1.5	0	0
OTU_6389	AGCCGCGGTAATTCCAGCTCCAATAGCGTATATTAAAGTTGTTGCGGTTAAAAAGCTCGTAGTTGGATCTCTGTCGAAGGAGACCGGTCCGCCCTCTGGGTGAGTATCTGGATCTCTTTGGACATCTTCTTGGGGAACGTATCTGCACTTCATTGTGCGGTGCGGTACTCAAGACTTTTACTTTGAGGAAATTAGAGTGTTTCAAGCAGGCACACGCCTTGAATA	99.6	Peridiniales	Kryptoperidiniaceae	Unruhdinium	0	0	0	0	0	0	0	0	0	2.2	0	0	0	0	0	0	0	0	0	0	1.5	0	0
OTU_6452	AGCCGCGGTAATTCCAGCTCCAATAGCGTATATTAAAGTTGTTGCGGTTAAAAAGCTCGTAGTTGGATTTCTGTCGAAGGAGACCGGTCCGCCCTCTGGGTGAGTATCTGGATCTCTTTGGACATCTTCTTGGGGAACGTATCTGCACTTCATTGTGCGGTGCGGTACTCAAGGCTTTTACTTTGAGGAAATTAGAGTGTTTCAAGCAGGCACACGCCTTGAATA	99.6	Peridiniales	Kryptoperidiniaceae	Unruhdinium	0	0	0	0	0	0	0	0	0	2.2	0	0	0	0	0	0	0	0	0	0	1.5	0	0
OTU_5759	AGCCGCGGTAATTCCAGCTCCAATAGCGTATATTAAAGTTGTTGCGGTTAAAAAGCTCGTAGTTGGATTTCTGTCGAAGGAGACCGGTCCGCCCTCTGGGTGAGTATCTGGATCTCTTTGGACATCTTCTTGGGGAACGTATCTGCACTTCATTGTGCGGTGCGGTACTCAAGACTTTTACTTTGAGGAAATTAGAGTGCTTCAAGCAGGCACACGCCTTGAATA	99.6	Peridiniales	Kryptoperidiniaceae	Unruhdinium	0	0	0	0	0	0	0	0	0	3.7	0	0	0	0	0	0	0	0	0	0	0	0	0
OTU_5754	AGCCGCGGTAATTCCAGCTCCAATAGCGTATATTAAAGTTGTTGCGGTTAAAAAGCTCGTAGTTGGATTTCTGTCGAAGGAGACCGGTCCGCCCTCTGGGTGAGTATCTGGATCTCTTTGGACATCTTCTTGGGGAACGTATCTGCACTTCATTGTGCGGTGCGGTACTCAAGACGTTTACTTTGAGGAAATTAGAGTGTTTCAAGCAGGCACACGCCTTGAATA	99.6	Peridiniales	Kryptoperidiniaceae	Unruhdinium	0	0	0	0	0	0	0	0	0	3.7	0	0	0	0	0	0	0	0	0	0	0	0	0
OTU_6157	AGCCGCGGTAATTCCAGCTCCAATAGCGTATATTAAAGTTGTTGCGGTTAAAAAGCTCGTAGTTTGACCTCTGCTCAGGTAGACTGGTCCGCCCTTTGGGTGAGCATCTGGCTTGGCCTGGGCATTTTCTTGGTGATCGCAGCTGCCCTTGACTGTGTGGTGCGGAATTCAGGACATTTACTTTGAGGAAATCAGAGTGTTTCAAGCAGGCATCTGCCTTGAATA	99.6	Gonyaulacales	Ceratiaceae	Ceratium	0	0	0	0	0	0	0	0	1.9	0	0	0	0	0	0.4	0	0	0	0	0.5	0	0	1
OTU_5550	AGCCGCGGTAATTCCAGCTCCAATAGCGTATATTAAAGTTGTTGCGGTTGAAAAGCTCGTAGTTTGACCTCTGCTCAGGTAGACTGGTCCGCCCTCTGGGTGAGCATCTGGCTTGGCCTGGGCATTTTCTTGGTGATCGCAGCTGCCCTTGACTGTGTGGTGCGGAATTCAGGACATTTACTTTGAGGAAATCAGAGTGTTTCAAGCAGGCATCTGCCTTGAATA	99.6	Gonyaulacales	Ceratiaceae	Ceratium	0	0	0	0	0	0.9	0	0	0	0	0	0	0	0	0.4	0	0	0	0	0	0	2.4	0
OTU_7264	AGCCGCGGTAATTCCAGCTCCAATAGCGTATATTAAAGTTGTTGCGGTTAAAAAGCTCGTAGTTGGATTTCTGCCGAGGACGACCGGTCCGCCCTCTGGGTGTGCATCTGGCTCGGCCTGGGCATCTTCTTGGAGAACGTCGCTGCACTTGACTGTGTGGTGCGGTATCCAGGACTTTTACTTTGAGGAAATTAGAGTGTTTCAAGCAGGCACACGCCTTGAATA	99.1	Dinophyceae_X	Dinophyceae_XX	Dinophyceae_XXX	0	0	0	0	0	0	0	0	0	0	0	0	0	0	0	0	0	0	2.8	0.9	0	0	0
OTU_7336	AGCCGCGGTAATTCCAGCTCCAATAGCGTATATTAAAGTTGTTGCGGTTAAAAAGCTCGTAGTTGGATTTCTGTTCAGGACGACCGGTCCGCCCTCCGGGTGAGCATCTGGTTCGGCCTGGGCATCTTCTTGGAGAACGTATCTGCACTTCATTGTGTGGTGCGGTATCCAGGACCTTTACTTTGAGGAAATTAGAGTGTTTCAAGCAGGCACACGCCTTGAATA	96.9	Dinophyceae_X	Dinophyceae_XX	Dinophyceae_XXX	0	0	0	0	0	0	0	0	0	0	0	0	0	0	0	0	0	0	2.8	0.9	0	0	0
OTU_7256	AGCCGCGGTAATTCCAGCTCCAATAGCGTATATTAAAGTTGTTGCGGTTAAAAAGCTCGTAGTTGGATTTCTGTTCAGGACGACCGGTCCGCCCTCCGGGTGAGCATCTGGTTCGGCCTGGGCATCTTCTTGGAGAACGTCGCTGCACTTGACTGTGTGGTTCGGTATCCAGGACTTTTACTTTGAGGAAATTAGAGTGTTTCAAGCAGGCACACGCCTTGAATA	97.8	Peridiniales	Peridiniopsidaceae	Parvodinium	0	0	0	0	0	0	0	0	0	0	0	0	0	0	0	0	0	0	2.8	0.9	0	0	0
OTU_7231	AGCCGCGGTAATTCCAGCTCCAATAGCGTATATTAAAGTTGTTGCGGTTAAAAAGCTCGTAGTTGGATTTCTGCCGAGGACGACCGGTCCGCCCTCTGGGTGTGCATCTGGCTCGGCCTGGGCATCTTCTTGGAGAACGTATCTGCACTTCATTGTGTGGTGCGGTATCCAGGACCTTTACTTTGAGGAACTTAGAGTGTTTCAAGCAGGCACACGCCTTGAATA	98.7	Peridiniales	Thoracosphaeraceae	Thoracosphaeraceae_X	0	0	0	0	0	0	0	0	0	0	0	0	0	0	0	0	0	0	2.8	0.9	0	0	0
OTU_7259	AGCCGCGGTAATTCCAGCTCCAATAGCGTATATTAAAGTTGTTGCGGTTAAAAAGCTCGTAGTTGGATTTCTGTTCAGGACGACCGGTCCGCCCTCTGGGTGTGCATCTGGCTCGGCCTGGGCATCTTCTTGGAGAACGTATCTGCACTTCATTGTGTGGTGCGGTATCCAGGACCTTTACTTTGAGGAAATTAGAGTGTTTCAAGCAGGCACACGCCTTGAATA	97.8	Peridiniales	Thoracosphaeraceae	Thoracosphaeraceae_X	0	0	0	0	0	0	0	0	0	0	0	0	0	0	0	0	0	0	2.8	0.9	0	0	0
OTU_7682	AGCCGCGGTAATTCCAGCTCCAATAGCGTATATTAAAGTTGTTGCGGTTAAAAAGCTCGTAGTTGGATTTCTGTCGAAGGAGACCGGTCCGCCCTCTGGGTGAGTATCTGGATCTCTTTGGACATCTTCTTGGGGAACGTATCCGCACTTCATTGTGCGGTGCGGTACTCAAGACTTTTACTTTGAGGAAATTAGAGTGTTTCAAGCAGGCACACGCCTTGAATA	99.6	Peridiniales	Kryptoperidiniaceae	Unruhdinium	0	0	0	0	0	0	0	0	0	1.5	0	0	0	0	0	0	0	0	0	0	0	1.2	1
OTU_10561	AGCCGCGGTAATTCCAGCTCCAATAGCGTATATTAAAGTTGTTGCGGTTAAAAAGCTCGTAGTTTGACCTCTGCTCAGGTAGACTGGTCCGCCCTCTGGGTGAGCATCTGGCTTGGCCTGGGCATTTTCTTGGTGATCGCAGCTGCCCTTGACTGTGTGGTGCGGAATTCAGGACATTTACTTTGAGGAAATCAGAGTGTTTCAAGCAGGCATCTTCCTTGAATA	99.6	Gonyaulacales	Ceratiaceae	Ceratium	0	0	0	0	0	0	0	0	0	0	0	0	0	0	0	0	0	0	0	0	0	3.6	0
OTU_10562	AGCCGCGGTAATTCCAGCTCCAATAGCGTATATTAAAGTTGTTGCGGTTAAAAAGCTCGTAGTTTGACCTCTGCTCAGGTAGACGGGTCCGCCCTCTGGGTGAGCATCTGGCTTGGCCTGGGCATTTTCTTGGTGATCGCAGCTGCCCTTGACTGTGTGGTGCGGAATTCAGGACATTTACTTTGAGGAAATCAGAGTGTTTCAAGCAGGCATCTGCCTTGAATA	99.6	Gonyaulacales	Ceratiaceae	Ceratium	0	0	0	0	0	0	0	0	0	0	0	0	0	0	0	0	0	0	0	0	0	3.6	0
OTU_10569	AGCCGCGGTAATTCCAGCTCCAATAGCGTATATTAAAGTTGTTGCGGTTAAAAAGCTCGTAGTTTGACCTCTGCTCAGGTAGACTGGTCCGCCCTCTGGGTGAGCATCTGGCTTGGCCTGGGCATTTTCTTGGTGATCGCAGCTGCCCTTGACTGTGTGGTGCGGAATTCAGGACATTTACTTTGAGGAAATCAGAGTGTTTCAAGCAGGAATCTGCCTTGAATA	99.6	Gonyaulacales	Ceratiaceae	Ceratium	0	0	0	0	0	0	0	0	0	0	0	0	0	0	0	0	0	0	0	0	0	3.6	0
OTU_10568	AGCCGCGGTAATTCCAGCTCCAATAGCGTATATTAAAGTTGTTGCGGTTAAAAAGCTCGTAGTTTGACCTCTGCTCAGGTAGACTGGTCCGCCCTCTGGGTGAGCATCTGGCTTGGCCTGGGCATTTTCTTGGTGATCGCAGCTGCCCTTGACTGTGTGGTGCGGAATTCAGGACATTTACTTTGAGGAAATCAGAGTGTTTCAAGCAGGCATATGCCTTGAATA	99.6	Gonyaulacales	Ceratiaceae	Ceratium	0	0	0	0	0	0	0	0	0	0	0	0	0	0	0	0	0	0	0	0	0	3.6	0
OTU_10579	AGCCGCGGTAATTCCAGCTCCAATAGCGTATATTAAAGTTGTTGCGGTTAAAAAGCTCGTAGTTTGACCTCTGCTCAGGTAGACTGGTCCGCCCTCTGGGTGAGCATCTGGCTTGGCCTGGGCATTTTCTTGGTGATCGCAGCTGCCCTTGACTGTGTGGTGCGGAATTCAGGACATTTACTTTGAGGAAATCAGAGTGTTTCAAGCAGTCATCTGCCTTGAATA	99.6	Gonyaulacales	Ceratiaceae	Ceratium	0	0	0	0	0	0	0	0	0	0	0	0	0	0	0	0	0	0	0	0	0	3.6	0
OTU_10582	AGCCGCGGGAATTCCAGCTCCAATAGCGTATATTAAAGTTGTTGCGGTTAAAAAGCTCGTAGTTTGACCTCTGCTCAGGTAGACTGGTCCGCCCTCTGGGTGAGCATCTGGCTTGGCCTGGGCATTTTCTTGGTGATCGCAGCTGCCCTTGACTGTGTGGTGCGGAATTCAGGACATTTACTTTGAGGAAATCAGAGTGTTTCAAGCAGGCATCTGCCTTGAATA	99.6	Gonyaulacales	Ceratiaceae	Ceratium	0	0	0	0	0	0	0	0	0	0	0	0	0	0	0	0	0	0	0	0	0	3.6	0
OTU_10586	AGCCGCGGTAATTCCAGCTCCAATCGCGTATATTAAAGTTGTTGCGGTTAAAAAGCTCGTAGTTTGACCTCTGCTCAGGTAGACTGGTCCGCCCTCTGGGTGAGCATCTGGCTTGGCCTGGGCATTTTCTTGGTGATCGCAGCTGCCCTTGACTGTGTGGTGCGGAATTCAGGACATTTACTTTGAGGAAATCAGAGTGTTTCAAGCAGGCATCTGCCTTGAATA	99.6	Gonyaulacales	Ceratiaceae	Ceratium	0	0	0	0	0	0	0	0	0	0	0	0	0	0	0	0	0	0	0	0	0	3.6	0
OTU_10588	AGCCGCGGTAATTCCAGCTCCAATAGCGTATATTAAAGTTGTTGCGGTTAAAAAGCTCGTAGTTTGACCTCTGCTCAGGTAGACTGGTCCGCCCTCTGGGTGAGCATCTGGCTTGGCCTGGGCATTTTCTTGGTGATCGCAGCTGCCCTTGACTGTGTGGTGCGGAATTCAGGACATTTCCTTTGAGGAAATCAGAGTGTTTCAAGCAGGCATCTGCCTTGAATA	99.6	Gonyaulacales	Ceratiaceae	Ceratium	0	0	0	0	0	0	0	0	0	0	0	0	0	0	0	0	0	0	0	0	0	3.6	0
OTU_10600	AGCCGCGGTAATTCCAGCTCCAATAGCGTATATTAAAGTTGTTGCGGTTAAAAAGCTCGTAGTTTGACCTCTGCTCAGGTAGACTGGTCCGCCCTCTGGGTGAGCATCTGGCTTGGCCTGGGCATTTTCTTGGTGATCGCAGCTGCCCTTGACTGTATGGTGCGGAATTCAGGACATTTACTTTGAGGAAATCAGAGTGTTTCAAGCAGGCATCTGCCTTGAATA	99.6	Gonyaulacales	Ceratiaceae	Ceratium	0	0	0	0	0	0	0	0	0	0	0	0	0	0	0	0	0	0	0	0	0	3.6	0
OTU_10606	AGCCGCGGTAATTCCAGCTCCAATAGCGTATATTAAAGTTGTTGCGGTTAAAAAGCTCGTAGTTTGACCTCTGCTCAGGTAGACTGGTCCGCCCTCTGGGTGAGCATCTGGCTTGGCCTGGGCATTTTCTTGGTGATCGCAGCTGCCCTTGACAGTGTGGTGCGGAATTCAGGACATTTACTTTGAGGAAATCAGAGTGTTTCAAGCAGGCATCTGCCTTGAATA	99.6	Gonyaulacales	Ceratiaceae	Ceratium	0	0	0	0	0	0	0	0	0	0	0	0	0	0	0	0	0	0	0	0	0	3.6	0
OTU_10619	AGCCGCGGTAATTCCAGCTCCAATAGCGTATATTAAAGTTGTTGCGGTTAAAAAGCTCGTAGTTTGACCTCTGCTCTGGTAGACTGGTCCGCCCTCTGGGTGAGCATCTGGCTTGGCCTGGGCATTTTCTTGGTGATCGCAGCTGCCCTTGACTGTGTGGTGCGGAATTCAGGACATTTACTTTGAGGAAATCAGAGTGTTTCAAGCAGGCATCTGCCTTGAATA	99.6	Gonyaulacales	Ceratiaceae	Ceratium	0	0	0	0	0	0	0	0	0	0	0	0	0	0	0	0	0	0	0	0	0	3.6	0
OTU_10617	AGCCGCGGTAATTCCAGCTCCAATAGCGTATATTAAAGTTGTTGCGGTTAAAAAGCTCGTAGTTTGACCTCTGCTCAGGTAGACTGGTCCGCCCTCTGGGTGAGCATCTGGCTTGGCCTGGGCAATTTCTTGGTGATCGCAGCTGCCCTTGACTGTGTGGTGCGGAATTCAGGACATTTACTTTGAGGAAATCAGAGTGTTTCAAGCAGGCATCTGCCTTGAATA	99.6	Gonyaulacales	Ceratiaceae	Ceratium	0	0	0	0	0	0	0	0	0	0	0	0	0	0	0	0	0	0	0	0	0	3.6	0
OTU_10622	AGCCGCGGTAATTCCAGCTCCAATAGCGTATATTAAAGTTGTTGCGGTTAAAACGCTCGTAGTTTGACCTCTGCTCAGGTAGACTGGTCCGCCCTCTGGGTGAGCATCTGGCTTGGCCTGGGCATTTTCTTGGTGATCGCAGCTGCCCTTGACTGTGTGGTGCGGAATTCAGGACATTTACTTTGAGGAAATCAGAGTGTTTCAAGCAGGCATCTGCCTTGAATA	99.6	Gonyaulacales	Ceratiaceae	Ceratium	0	0	0	0	0	0	0	0	0	0	0	0	0	0	0	0	0	0	0	0	0	3.6	0
OTU_7411	AGCCGCGGTAATTCCAGCTCCAATAGCGTATATTAAAGTTGTTGCGGTTAAAAAGCTCGTAGTTTGACCTCTGCTCAGGTAGACTGGTCCGCCCTCTGGGTGAGCATCTGGCTTGGCCTGGGCATTTTCTTGGTGATCGCAGCTGCCCTTGACTGTGTGGTGCGGAATTCAGGACATTTACTTTGAGGAAATCAGAGTGTTTCAAGCCGGCATCTGCCTTGAATA	99.6	Gonyaulacales	Ceratiaceae	Ceratium	0	0	0	0	0	0	0	0	0	0.7	0	0	0	0	0	0	0	0	0	0.5	0	2.4	0
OTU_8772	AGCCGCGGTAATTCCAGCTCCAATAGCGTATATTAAAGTTGTTGCGGTTAAAAAGCTCGTAGTTGGATTTCTGTCGAAGGAGACCGGTCCGCCATCTGGGTGAGTATCTGGATCTCTTTGGACATCTTCTTGGGGAACGTATCTGCACTTCATTGTGCGGTGCGGTACTCAAGACTTTTACTTTGAGGAAATTAGAGTGTTTCAAGCAGGCACACGCCTTGAATA	99.6	Peridiniales	Kryptoperidiniaceae	Unruhdinium	0	0	0	0	0	0	0.5	0	0	0	0	0	0	0	0	0	0	0	0	0	3	0	0
OTU_8819	AGCCGCGGTAATTCCAGCTCCAATAGCGTATATTAAAGTTGTTGCGGTTAAAAAGCTCGTAGTTTGACCTCTGCTCAGGTAGACTGGTGCGCCCTCTGGGTGAGCATCTGGCTTGGCCTGGGCATTTTCTTGGTGATCGCAGCTGCCCTTGACTGTGTGGTGCGGAATTCAGGACATTTACTTTGAGGAAATCAGAGTGTTTCAAGCAGGCATCTGCCTTGAATA	99.6	Gonyaulacales	Ceratiaceae	Ceratium	0	0	0	0	0	0.5	0	0	0	0	0	0	0	0	0	0	0	0	0	0	3	0	0
OTU_7046	AGCCGCGGTAATTCCAGCTCCAATAGCGTATATTAAAGTTGTTGCGGTTAAAAAGCTCGTAGTTTGACCTCTGCTCAGGTAGTCTGGTCCGCCCTCTGGGTGAGCATCTGGCTTGGCCTGGGCATTTTCTTGGTGATCGCAGCTGCCCTTGACTGTGTGGTGCGGAATTCAGGACATTTACTTTGAGGAAATCAGAGTGTTTCAAGCAGGCATCTGCCTTGAATA	99.6	Gonyaulacales	Ceratiaceae	Ceratium	0	0	0	0	0	0	0	0	0	0	0	0	0.5	0	0	0.5	0	0	0	0	0	2.4	0
OTU_10564	AGCCGCGGTAATTCCAGCTCCAATAGCGTATATTAAAGTTGTTGCGGTTAAAAAGCTCGTAGTTTGACCTCTGCTCAGGTAGACTGGTCCGCCCTCTGGGTGAGCATCTGGCTTGGCCTGGGCATTTTCTTGGTGATCGCAGCTGCCCTTGACTGTGTGGTGCGGAATTCAGGACATTTACTTTGAGGAAATCAGAGTGTTTCAAGCAGGCATCTGCCTTAGATC	100	Gonyaulacales	Ceratiaceae	Ceratium	0	0	0	0	0	0	0	0	0	0.7	1.5	0	0	0	0	0	0	0	0	0	0	1.2	0
OTU_8008	AGCCGCGGTAATTCCAGCTCCAATAGCGTATATTAAAGTTGTTGCGGTTAAAAAGCTCGTAGTTGGATTTCTGCCGAGGACGACCGGTCCGCCCTCTGGGTGTGCATCTGGCTCGGCCTGGGCATCTTCTTGGAGAACGTATCTGCACTTCATTGTGTGGTGCGGTATCCAGGACTTTTACTTTGAGGAAATTAGAGTGTTTCAAGCAGGCACACGCCTTGAATA	99.6	Peridiniales	Thoracosphaeraceae	Thoracosphaeraceae_X	0.7	0	0	0	0	0	0	0	0	0	0	0	0	0	0	0	0	0	2.8	0	0	0	0
OTU_4149	AGCCGCGGTAATTCCAGCTCCAATAGCGTATATTAAAGTTGTTGCGGTTAAAAAGCTCGTAGTTGGATTTCTGCCGAGGACGACCGGTCCGCCCACTGGGTGTGCATCTGGTTCGGCCTGGGCATCTTCTTGGAGAACGTATTTGCACTTAACTGTGTGGTGCGGTATCCAGGACTTTTACTTTGAGGAAATTAGAGTGTTTCAAGCAGGCACACGCCTTGAATA	99.1	Peridiniales	Thoracosphaeraceae	Thoracosphaeraceae_X	0	0	0	0	0	0	0	0	0	0.7	0	0	2.7	0	0	0	0	0	0	0	0	0	0
OTU_7686	AGCCGCGGTAATTCCAGCTCCAATAGCGTATATTAAAGTTGTTGCGGTTAAAAAGCTCGTAGTTTGACCTCTGCTCAGGTAGACTGGTCCGTCCTCTGGGTGAGCATCTGGCTTGGCCTGGGCATTTTCTTGGTGATCGCAGCTGCCCTTGACTGTGTGGTGCGGAATTCAGGACATTTACTTTGAGGAAATCAGAGTGTTTCAAGCAGGCATCTGCCTTGAATA	99.6	Gonyaulacales	Ceratiaceae	Ceratium	0	0	0.5	0	0	0.5	0	0	0	0	0	0	0	0	0	0	0	0	0	0	0	2.4	0
OTU_10557	AGCCGCGGTAATTCCAGCTCCAATAGCGTATATTAAAGTTGTTGCGGTTAAAAAGCTCGTAGTTTGACCTCTGCTCAAGTAGACTGGTCCGCCCTCTGGGTGAGCATCTGGCTTGGCCTGGGCATTTTCTTGGTGATCGCAGCTGCCCTTGACTGTGTGGTGCGGAATTCAGGACATTTACTTTGAGGAAATCAGAGTGTTTCAAGCAGGCATCTGCCTTGAATA	99.6	Gonyaulacales	Ceratiaceae	Ceratium	0	0	0	0	0	0	0	0	0	0	0	0	0	0	0	0	0	0	0	0	0	2.4	1
OTU_10580	AGCCGCGGTAATTCCAGCTCCAATAGCGTATATTAAAGTTGTTGCGGTTAAAAAGCTCGTAGTTTGACCTCTGCTCAGGTAGACTGGTCCGCCCTCTGCGTGAGCATCTGGCTTGGCCTGGGCATTTTCTTGGTGATCGCAGCTGCCCTTGACTGTGTGGTGCGGAATTCAGGACATTTACTTTGAGGAAATCAGAGTGTTTCAAGCAGGCATCTGCCTTGAATA	99.6	Gonyaulacales	Ceratiaceae	Ceratium	0	0	0	0	0	0	0	0	0	0	0	0	0	0	0	0	0	0	0	0	0	2.4	1
OTU_10689	AGCCGCGGTAATTCCAGCTCCAATAGCGTATATTAAAGTTGTTGCGGTTAAAAAGCTCGTAGTTTGACCTCTGCTCAGGTAGACTGGTCCGCCCTCTGGGTGAGTATCTGGCTTGGCCTGGGCATTTTCTTGGTGATCGCAGCTGCCCTTGACTGTGTGGTGCGGAATTCAGGACATTTACTTTGAGGAAATCAGAGTGTTTCAAGCAGGCATCTGCCTTGAATA	99.6	Gonyaulacales	Ceratiaceae	Ceratium	0	0	0	0	0	0	0	0	0	0	0	0	0	0	0	0	0	0	0	0	0	2.4	1
OTU_10608	AGCCGCGGTAATTCCAGCTCCAATAGCGTATATTAAAGTTGTTGCGGTTAAAAAGCTCGTAGTTTGACCTCTGCTCAGGTAGACTGGTCCGCCCTCTGGGTGAGCATCTGGCTTGGCCTGGGCATTTTCTTGGTGATCGCAGCTGCCCTTGACTGTGTGGTGCGGAATTCAGGACAGTTACTTTGAGGAAATCAGAGTGTTTCAAGCAGGCATCTGCCTTGAATA	99.6	Gonyaulacales	Ceratiaceae	Ceratium	0	0	0	0	0	0	0	0	0	0	0	0	0	0	0	0	0	0	0	0	0	2.4	1
OTU_7385	AGCCGCGGTAATTCCAGCTCCAATAGCGTATATTAAAGTTGTTGCGGTTAAAAAGCTCGTAGTTTGACCTCTGCTCAGGTAGACTGGTCCGCCCTCTGGGTGAGCATCTGGCTTGGCCTGGGCATTTTCTTGGTGATCGCAGCTGCCCTTGACTGTGTGGTGCGGAATTCAGGACATTTACTTTGAGGAAATCAGAGTGTTTCAAGCAGGCATCTGCCTTCAATA	99.6	Gonyaulacales	Ceratiaceae	Ceratium	0	0	0	0	0	0.5	0	0	0	0	0	0	0	0.5	0	0	0	0	0	0	0	2.4	0
OTU_11301	AGCCGCGGTAATTCCAGCTCCAATAGCGTATATTAAAGTTGTTGCGGTTAAAAAGCTCGTAGTTTGACCTCTGCTCAGGTAGACTGGTCCGCCCTCTGGGTGAGCATCTGGCTTGGCCTGGGCACTTTCTTGGTGATCGCAGCTGCCCTTGACTGTGTGGTGCGGAATTCAGGACATTTACTTTGAGGAAATCAGAGTGTTTCAAGCAGGCATCTGCCTTGAATA	99.6	Gonyaulacales	Ceratiaceae	Ceratium	0	0	0	0	0	0	0	0	0	0.7	0	0	0	0	0	0	0	0	1.4	0	0	1.2	0
OTU_11388	AGCCGCGGTAATTCCAGCTCCAATAGCGTATATTAAAGTTGTTGCGGTTAAAAAGCTCGTAGTTTGACCTCTGCTCAGGTAGACTGGTCCGCCCTCTGGGTGAGCATCTGGCTTGGCCTGGGCATTTTCTTGGTGATCGCAGCTGCCCTTGACTGTGTGGTGCGGAATTCAGGACATTTACTTTGAGGAAATCAGCGTGTTTCAAGCAGGCATCTGCCTTGAATA	99.6	Gonyaulacales	Ceratiaceae	Ceratium	0	0	0	0	0	0	0	0	0	0	0	0.9	0	0	0	0	0	0	0	0	0	2.4	0
OTU_11407	AGACGCGGTAATTCCAGCTCCAATAGCGTATATTAAAGTTGTTGCGGTTAAAAAGCTCGTAGTTTGACCTCTGCTTAGGTAGACTGGTCCGCCCTCTGGGTGAGCATCTGGCTTGGCCTGGGCATTTTCTTGGTGATCGCAGTTGCCCTTGACTGTGTGGTGCGGAATTCAGGACATTTACTTTGAGGAAATCAGAGTGTTTCAAGCAGGCATCTGCCTTGAATA	98.7	Gonyaulacales	Ceratiaceae	Ceratium	0	0	0	0	0	0	0	0	0	0	0	0.9	0	0	0	0	0	0	0	0	0	2.4	0
OTU_10607	AGCCGCGGTAATTCCAGCTCCAATAGCGTATATTAAAGTTGTTGCGGTTAAAAAGCTCGTAGTTTGACCTCTGCTCAGGTAGACTGGTCCGCCCTCTGGGTGAGCATCTGGCTTGGCCTGGGCATTTTCTTGGTGATCGCAGCTGCCCTTGACTGTGTGGTGCGGAATTCAGGACATTTACTTTGAGGAAATCAGAGTGTTTCAAGCAGGCATCTGCCCTGAATA	99.6	Gonyaulacales	Ceratiaceae	Ceratium	0	0	0	0	0	0	0	0	0	0	0	0.9	0	0	0	0	0	0	0	0	0	2.4	0
OTU_4611	AGCTGCGGTAATTCCAGCTCCAATAGCGTATATTAAAGTTGTTGCGGTTAAAAAGCTCGTAGTTGGATTTCTGCCTAGGACAACCGACCGACCCATACGGGTTTGTGTCTGGTTTGACCGAGGCATCCTCTTGGAAGACGTGCGCCCTTGTGGCCACGGAGTCCAGGACTTTTACTTTGAGGAAATTAGAGTGTTTCAAACAGGCGTTCGCCGTGAATACATTAG	96.4	Prorocentrales	Prorocentraceae	Prorocentrum	3.3	0	0	0	0	0	0	0	0	0	0	0	0	0	0	0	0	0	0	0	0	0	0
OTU_10618	AGCCGCGGTAATTCCAGCTCCACTAGCGTATATTAAAGTTGTTGCGGTTAAAACGCTCGTAGTTGGACCTCTGCCGAGAACGACTGGTCCGCCCTCTGGGTGAGTATCTGGCTCGGGCTGGGCATCTTCTTGGAAAGCGTAGCTGCGCTTGACTGTGTGGCGCGGTGTCCAAGACTTTTACTTTGAGGAAATTAGAGTGCTTCAAGCAGGCGCACGCCCTGAATA	97.3	Peridiniales	Peridiniaceae	Peridinium	0	0	0	0	1.6	0	0	0	0	0	0	0	0	0.5	0	0	0	0	0	0	0	1.2	0
OTU_7412	AGCCGCGGTAATTCCAGCTCCAATAGCGTATATTAAAGTTGTTGCGGTTAAAAAGCTCGTAGTTTGACCTCTGCTCAGGTAGACTGGTCCGCCCTCTGGGTGAGCATCTGGCTTGGCCTGGGCATTTTCTTTGTGATCGCAGCTGCCCTTGACTGTGTGGTGCGGAATTCAGGACATTTACTTTGAGGAAATCAGAGTGTTTCAAGCAGGCATCTGCCTTGAATA	99.6	Gonyaulacales	Ceratiaceae	Ceratium	0	0	0.5	0	0	0	0	0	0	0	0	0	0	0	0.4	0	0	0	0	0	0	2.4	0
OTU_7392	AGCCGCGGTAATTCCAGCTCCAATAGCGTATATTAAAGTTGTTGCGGTTAAAAAGCTCGTAGTTTGACCTCTGCTCAGGTAGACTGGTCCGCCCTCTGGGTGAGCATCTGGCTTGGCCTGGGCATTTTCTTGGTGATCGCAGCTGCCCTTGACTGTGTGGTGCGGAATTCAGGACATTTACTTTGAGGAAATCAGAGTGTTTCAAGCAGGTATCTGCCTTGAATA	99.6	Gonyaulacales	Ceratiaceae	Ceratium	0	0	0	0	0	0	0	0	0	0	0	0	0	0.5	0.4	0	0	0	0	0	0	2.4	0
OTU_7831	AGCCGCGGTAATTCCAGCTCCAATAGCGTATATTAAAGTTGTTGCGGTTAAAAAGCTCGTAGTTGGATTTCTGCTGAGGATGACCGGTCCGCCCTCTGGGCAGGTATCTGGCTCAGCTTTGGCATCTTCTTGAAAAATGTGTCTGCACTTGACTGTGTGGTGCAATATTCAAGACATTTACTTTGAGGAAATTAGAGTGTTTCAAGCAAGCGAGTGCTTTGAATA	99.1	Suessiales	Suessiaceae	Asulcocephalium	0	0	0	0	0	0	0	0	0	0	0	2.7	0.5	0	0	0	0	0	0	0	0	0	0
OTU_10347	AGCCGCGGTAATTCCAGCTCCAATAGCGTATATTAAAGTTGTTGCGGTTAAAAAGCTCGTAGTTGGATTTCTGCCGAGGACGACCGGTCCGCCCTCTGGGTGTGCATCTGGCTCGGCCTGGGCATCTTCTTGGAGAACGTATCTGCACTTCATTGTGTGGTGCGGTATCCAGGACCTTTACTTTGAGGAAATTAGAGTGTTTCAAGCAGGCACACGCCTTGAATC	99.1	Peridiniales	Thoracosphaeraceae	Thoracosphaeraceae_X	0	0	0	0	0	0	0	0	0	0	0	0	0	0	0	0	0	0	2.8	0.5	0	0	0
OTU_7748	AGCCGCGGTAATTCCAGCTCCAATAGCGTATATTAAAGTTGTTGCGGTTAAAAAGCTCGTAGTTGGATTTCTGTCGAAGGAGACCGGTCCGCCCTCTGGGTGAGTATCTGGATCTCTTTGGACATCTTCTTGGGGAACGTATCTGCACTTCATTGTGCGGTGCGGTACTCAAGACTTTTACTTTGAGGAAATTAGAGTGCTTAAAGCAGGCCATACGCCTGAATA	98.2	Peridiniales	Kryptoperidiniaceae	Unruhdinium	0	0	0.5	0	0	0	0	0	0	0.7	1.5	0	0	0.5	0	0	0	0	0	0	0	0	0
OTU_10573	AGCCGCGGTAATTCCAGCTCCAATAGCGTATATTAAAGTTGTTGCGGTTAAAAAGCTCGTAGTTTGACCTCTGCTCAGGTAGACTGGTCCGCCCTCTGGGTGAGCATCTGGCTTGGCCTGGGCATTTTCTTGGTGATCGCAGCTGCCCTTGACTGTGTGGTGCGGAATTCAGGACATTTACTTTGAGGAAATCAGAGTGTTTCCAGCAGGCATCTGCCTTGAATA	99.6	Gonyaulacales	Ceratiaceae	Ceratium	0	0	0	0	0	0	0	0	0	0.7	0	0	0	0	0	0	0	0	0	0	0	2.4	0
OTU_8825	AGCCGCGGTAATTCCAGCTCCAATAGTGTATATTAAAGTTGTTGCGGTTAAAAAGCTCGTAGTTGGATTTCTGTCGAAGGAGACCGGTCCGCCCTCTGGGTGAGTATCTGGATCTCTTTGGACATCTTCTTGGGGAACGTATCTGCACTTCATTGTGCGGTGCGGTACTCAAGACTTTTACTTTGAGGAAATTAGAGTGTTTCAAGCAGGCACACGCCTTGAATA	99.6	Peridiniales	Kryptoperidiniaceae	Unruhdinium	0	0	0	0	0	0	0	0	0	0.7	0	0.9	0	0	0	0	0	0	0	0	1.5	0	0
OTU_5124	AGCCGCGGTAATTCCAGCTCCAATAGCGTATATTAAAGTTGTTGCGGTTAAAAAGCTCGTAGTTGGATTTCTGTCGAAGGAGACCGGTCCGCCCTCTGGGTGAGTATCTGGATCTCTTTGGACATCTTCTTGGGGAACGTATCTGCACTTCATTGTGCGGTGCGGTACTCAAGACTTTTACTTTGAGGAAATTAGAGTGTTTCAAGCAGGCACGCGCCTTGAATA	99.6	Peridiniales	Kryptoperidiniaceae	Unruhdinium	0	0	0	0	0	0	0.5	0	0	2.2	0	0	0	0	0.4	0	0	0	0	0	0	0	0
OTU_7714	AGCCGCGGTAATTCCAGCTCCAATAGCGTATATTAAAGTTGTTGCGGTTAAAAAGCTCGTAGTTGGATTTCTGTCGAAGGAGACCGGTCCGCCCTCTGGGTGAGTATCTGGATCTCTTTGGACATCTTCTTGGGGAACGTATCTGCACTTCATTGTGCGGTGCGGTACTCAAGACTTTTACTTTGAGGAAATTAGAGTGTTTCAAGCAGGCCCACGCCTTGAATA	99.6	Peridiniales	Kryptoperidiniaceae	Unruhdinium	0	0	0	0	0	0	0	0	0	2.2	0	0.9	0	0	0	0	0	0	0	0	0	0	0
OTU_7050	AGCCGCGGTAATTCCAGCTCCAATAGCGTATATTAAAGTTGTTGCGGTTAAAAAGCTCGTAGTTTGACCTCTGCTCAGGTAGACTGGTCCGCCCTCTGGGTGAGCATCTGGCTTGGCCTGGGCATTTTCTTGGTGATCGCAGCTGCCCTTGACTGTGTGGTGCGGAATTCAGGACATTCACTTTGAGGAAATCAGAGTGTTTCAAGCAGGCATCTGCCTTGAATA	99.6	Gonyaulacales	Ceratiaceae	Ceratium	0	0	0	0	0	0	0	0	0	0	0	0	0	0	0	0.5	0.2	0	0	0	0	2.4	0
OTU_10628	AGCCGCGGTAATTCCAGCTCCAATAGCGTATATTAAAGTTGTTGCGGTTAAAAAGCTCGTAGTTTGACCTCTGCTCAGGTAGACTGGTCCGCCCTCTGGGTGAGCATCTGGCTTGGCCTGGGCATTTTCTTGGTGATCGCAGCTGCCCTTGACTGTGTGGTGCGGAATTCAGGACATTTACTTTGAGGATATCAGAGTGTTTCAAGCAGGCATCTGCCTTGAATA	99.6	Gonyaulacales	Ceratiaceae	Ceratium	0	0	0	0	0	0	0	0	0	0	0	0	0.5	0	0	0	0	0	1.4	0	0	1.2	0
OTU_10767	AGCCGCGGTAATTCCAGCTCCAATAGCGTATATTAAAGTTGTTGCGGTTAAAAAGCTCGTAGTTGGATTTCTGTCGAAGGAGACCGGTCCGCCCTCTGGGTGAGTATCTGGATCTCTTTGGACATCTTCTTGGGGAACGTATCTGCACTTCATTGTGCGGTGCGGTACTCAGGACTTTTACTTTGAGGAAATTAGAGTGTTTCAAGCAGGCACACGCCTTGAATA	99.6	Peridiniales	Kryptoperidiniaceae	Unruhdinium	0	0	0	0	1.6	0	0	0	0	1.5	0	0	0	0	0	0	0	0	0	0	0	0	0
OTU_8961	AGCCGCGGTAATTCCAGCTCCAATAGCGTATATTAAAGTTGTTGCGGTTAAAAAGCTCGTAGTTGGATTTCTGCGTAGGACGACTGGTCCGCCCTCTGGGTGAGCATCTGGGTCAGCCTGTGCATCCTCGTGGAGAACGCAGCTGCACTTGATTGTGTGGTGTGGTATCTGCGACTTTTACTTTGAGGAAATTAGAGTGCTTCAAGCAGGTATGCGCCTGAATAC	98.7	Dinophyceae_X	Tovelliaceae	Woloszynskia	0	0	0.5	2	0	0	0.5	0	0	0	0	0	0	0	0	0	0	0	0	0	0	0	0
OTU_7164	AGCCGCGGTAATTCCAGCTCCAATAGCGTATATTAAAGTTGTTGCGGTTAAAAAGCTCGTAGTTTGACCTCTGCTCAGGTAGACTGGTCCGCCCTCTGGGTGAGCATCTGGCTTGGCCTGGGCATTTTCTTGGTGATCGCAGCTGCCCTTGACTGTGTGGTGCGGAATTCAGGTCATTTACTTTGAGGAAATCAGAGTGTTTCAAGCAGGCATCTGCCTTGAATA	99.6	Gonyaulacales	Ceratiaceae	Ceratium	0	0	0	0	0	0.5	0	0	0	0	0	0	0	0	0	0	0.2	0	0	0	0	2.4	0
OTU_10315	AGCCGCGGTAATTCCAGCTCCAATAGCGTATATTAAAGTTGTTGCGGTTAAAAAGCTCGTAGTTTGACCTCTGCTCAGGTAGACTGGTCCGCCCTCTGGGTGAGCATCTGGCTTGGCCTGGGCATTTTCTTGGTGATCGCAGCTGCCCTTGACTGTGTGGTGCGGACTTCAGGACATTTACTTTGAGGAAATCAGAGTGTTTCAAGCAGGCATCTGCCTTGAATA	99.6	Gonyaulacales	Ceratiaceae	Ceratium	0	0	0	0	0	0	0	0	0	0	0	0	0	0	0	0.5	0	0	1.4	0	0	1.2	0
OTU_10602	AGCCGCGGTAATTCCAGCTCCAATAGCGTATATTAAAGTTGTTGCGGTTAAAAAGCTCGTAGTTTGACCTCTGCTCAGGTAGACTGGTCCGCCCTCTGGGTGAGCATCTGGCTTGGCCTGGGCATTTTCTTGGTGATCGCAGCTGCCCTTGACTGTGTGGTGCGGAATTCAGGACATTTACTTTGAGGAAATCAGAGTGTTTCAAGCAGGCATCTGCCTTGAGTA	100	Gonyaulacales	Ceratiaceae	Ceratium	0	0	0	0	0	0	0	0	0	0	1.5	0	0	0	0.4	0	0	0	0	0	0	1.2	0
OTU_10286	AGCCGCGGTAATTCCAGCTCCAATAGCGTATATTAAAGTTGTTGCGGTTAAAAAGCTTGTAGTTGGATTTCTGCGTAGGATGATTGGTCCGCCCTCTGGGTGAGTACCCAAGTCAGCTTGCGCATCTTCATGGAGACCACAGCTGCACTTGATTGTTTGGTGTGGCATCTGTGACATTTACTTTGAGGAAATTAGAGTGTTTCAAGCAGGTGTTCGCCTGAATAT	99.1	Dinophyceae_X	Dinophyceae_XX	Dinophyceae_XXX	0	0	0	0	0	0	0	0	0	0	0	0	0	0	0	0	0.2	0	2.8	0	0	0	0
OTU_8850	AGCCGCGGTAATTCCAGCTCCAATAGCGTATATTAAAGTTGTTGCGGTTAAAAAGCTCGTAGTTGGATTTCCGTCGAAGGAGACCGGTCCGCCCTCTGGGTGAGTATCTGGATCTCTTTGGACATCTTCTTGGGGAACGTATCTGCACTTCATTGTGCGGTGCGGTACTCAAGACTTTTACTTTGAGGAAATTAGAGTGTTTCAAGCAGGCACACGCCTTGAATA	99.6	Peridiniales	Kryptoperidiniaceae	Unruhdinium	0	0	0	0	0	0	0	0	0	1.5	0	0	0	0	0	0	0	0	0	0	1.5	0	0
OTU_8854	AGCCGCGGTAATTCCAGCTCCAATAGCGCATATTAAAGTTGTTGCGGTTAAAAAGCTCGTAGTTGGATTTCTGTCGAAGGAGACCGGTCCGCCCTCTGGGTGAGTATCTGGATCTCTTTGGACATCTTCTTGGGGAACGTATCTGCACTTCATTGTGCGGTGCGGTACTCAAGACTTTTACTTTGAGGAAATTAGAGTGTTTCAAGCAGGCACACGCCTTGAATA	99.6	Peridiniales	Kryptoperidiniaceae	Unruhdinium	0	0	0	0	0	0	0	0	0	1.5	0	0	0	0	0	0	0	0	0	0	1.5	0	0
OTU_8882	AGCCGCGGTAATTCCAGCTCCAATAGCGTATATTAAAGTTGTTGCGGTTAAAAAGCTCGTAGTTGGATTTCTGTCGAAGGAGACCGGTCCGCCCTCTGGGTGAGTATCTGGATCTCTTTGGACATCTTCTTGGGGAACGTATCTGCACTTCATTGTGCGGTGCGGTACTCAAGACTTTTACTTTGAGGAAATTATAGTGTTTCAAGCAGGCACACGCCTTGAATA	99.6	Peridiniales	Kryptoperidiniaceae	Unruhdinium	0	0	0	0	0	0	0	0	0	1.5	0	0	0	0	0	0	0	0	0	0	1.5	0	0
OTU_8937	AGCCGCGGTAATTCCAGCTCCAATAGCATATATTAAAGTTGTTGCGGTTAAAAAGCTCGTAGTTGGATTTCTGTCGAAGGAGACCGGTCCGCCCTCTGGGTGAGTATCTGGATCTCTTTGGACATCTTCTTGGGGAACGTATCTGCACTTCATTGTGCGGTGCGGTACTCAAGACTTTTACTTTGAGGAAATTAGAGTGTTTCAAGCAGGCACACGCCTTGAATA	99.6	Peridiniales	Kryptoperidiniaceae	Unruhdinium	0	0	0	0	0	0	0	0	0	1.5	0	0	0	0	0	0	0	0	0	0	1.5	0	0
OTU_7674	AGCCGCGGTAATTCCAGCTCCAATAGCGTATATTAAAGTTGTTGCGGTTAAAAAGCTCGTAGTTGGATTTCTGTCGAAGGAGACCGGTCCGCCCTCTGGGTGAGTATCTGGATCTCTTTGGACATCTTCTTGGGGAACGTATCTGCACTTCATTGTGCGGTGCGGTACTCAAGACTTTTACGTTGAGGAAATTAGAGTGTTTCAAGCAGGCACACGCCTTGAATA	99.6	Peridiniales	Kryptoperidiniaceae	Unruhdinium	0	0	0	0	0	0	0	0	0	3	0	0	0	0	0	0	0	0	0	0	0	0	0
OTU_7704	AGCCGCGGTAATTCCAGCTCCAATAGCGTATATTAAGGTTGTTGCGGTTAAAAAGCTCGTAGTTGGATTTCTGTCGAAGGAGACCGGTCCGCCCTCTGGGTGAGTATCTGGATCTCTTTGGACATCTTCTTGGGGAACGTATCTGCACTTCATTGTGCGGTGCGGTACTCAAGACTTTTACTTTGAGGAAATTAGAGTGTTTCAAGCAGGCACACGCCTTGAATA	99.6	Peridiniales	Kryptoperidiniaceae	Unruhdinium	0	0	0	0	0	0	0	0	0	3	0	0	0	0	0	0	0	0	0	0	0	0	0
OTU_7684	AGCCGCGGTAATTCCAGCTCCAATAGCGTATATTAAAGTTGTTGCGGTTAAAAAGCTCGTAGTTGGATTTCTGTCGAAGGAGACCGGTCCGCCCTCTGGGTGAGTATCTGGATCTCTTTGGACATCTTCTTGGGGAACGTATCTGCACTTCATTGTGCGGTGCGGTACTCAAGACTTTTACTTTGAGGAAATTAGAGTGTTTCAAGCAGGAACACGCCTTGAATA	99.6	Peridiniales	Kryptoperidiniaceae	Unruhdinium	0	0	0	0	0	0	0	0	0	3	0	0	0	0	0	0	0	0	0	0	0	0	0
OTU_7689	AGCCGCGGTAATTCCAGCTCCAATAGCGTATATTAAAGTTGTTGCGGTTAAAAAGCTCGTAGTTGGATTTCTGTCGAAGGAGACCGGTCCGCCCTCTGGGTGAGTATCTGGATCTCTTTGGACATCTTCTTGGGGAACGTATCTGCACTTCATTGTGCGGTGCGGTACTCAAGACTTTTACTTTGAGGAAATTAGAGCGTTTCAAGCAGGCACACGCCTTGAATA	99.6	Peridiniales	Kryptoperidiniaceae	Unruhdinium	0	0	0	0	0	0	0	0	0	3	0	0	0	0	0	0	0	0	0	0	0	0	0
OTU_7692	AGCCGCGGTAATTCCAGCTCCAATAGCGTATATTAAAGTTGTTGCGGTTAAAAAGCTCGTAGCTGGATTTCTGTCGAAGGAGACCGGTCCGCCCTCTGGGTGAGTATCTGGATCTCTTTGGACATCTTCTTGGGGAACGTATCTGCACTTCATTGTGCGGTGCGGTACTCAAGACTTTTACTTTGAGGAAATTAGAGTGTTTCAAGCAGGCACACGCCTTGAATA	99.6	Peridiniales	Kryptoperidiniaceae	Unruhdinium	0	0	0	0	0	0	0	0	0	3	0	0	0	0	0	0	0	0	0	0	0	0	0
OTU_7696	AGCCGCGGTAATTCCAGCTCCAATAGCGTATATTAAAGTTGTTGCGGTTAAAAAGCTCGTAGTTGGATTTCTGTCGAAGGAGACCGGTCCGCCCTCTGGGTGAGTATCTGGATCTCTTTGGACATCTTCTTGGGGAACGTGTCTGCACTTCATTGTGCGGTGCGGTACTCAAGACTTTTACTTTGAGGAAATTAGAGTGTTTCAAGCAGGCACACGCCTTGAATA	99.6	Peridiniales	Kryptoperidiniaceae	Unruhdinium	0	0	0	0	0	0	0	0	0	3	0	0	0	0	0	0	0	0	0	0	0	0	0
OTU_7694	AGCCGCGGTAATTCCAGCTCCAATAGCGTATATTAAAGTTGTTGCGGTTAAAAAGCTCGTAGTTGGATTTCTGTCGAAGGAGGCCGGTCCGCCCTCTGGGTGAGTATCTGGATCTCTTTGGACATCTTCTTGGGGAACGTATCTGCACTTCATTGTGCGGTGCGGTACTCAAGACTTTTACTTTGAGGAAATTAGAGTGTTTCAAGCAGGCACACGCCTTGAATA	99.6	Peridiniales	Kryptoperidiniaceae	Unruhdinium	0	0	0	0	0	0	0	0	0	3	0	0	0	0	0	0	0	0	0	0	0	0	0
OTU_7709	AGCCGCGGTGATTCCAGCTCCAATAGCGTATATTAAAGTTGTTGCGGTTAAAAAGCTCGTAGTTGGATTTCTGTCGAAGGAGACCGGTCCGCCCTCTGGGTGAGTATCTGGATCTCTTTGGACATCTTCTTGGGGAACGTATCTGCACTTCATTGTGCGGTGCGGTACTCAAGACTTTTACTTTGAGGAAATTAGAGTGTTTCAAGCAGGCACACGCCTTGAATA	99.6	Peridiniales	Kryptoperidiniaceae	Unruhdinium	0	0	0	0	0	0	0	0	0	3	0	0	0	0	0	0	0	0	0	0	0	0	0
OTU_7697	AGCCGCGGTAATTCCAGCTCCAATAGCGTATATTAAAGTTGTTGCGGTTAAAAAGCTCGTAGTTGGATTTCTGTCGAAGGAGACCGGTCCGCCCTCTGGGTGAGTATCTGGGTCTCTTTGGACATCTTCTTGGGGAACGTATCTGCACTTCATTGTGCGGTGCGGTACTCAAGACTTTTACTTTGAGGAAATTAGAGTGTTTCAAGCAGGCACACGCCTTGAATA	99.6	Peridiniales	Kryptoperidiniaceae	Unruhdinium	0	0	0	0	0	0	0	0	0	3	0	0	0	0	0	0	0	0	0	0	0	0	0
OTU_7733	AGCCGCGGTAATTCCAGCTCCAATAGCGTATATTAAAGTTGTTGCGGTTAAAAAGCTCGTAGTTGGATTTCTGTCGAAGGAGACCGGTCCGCCCTCTGGGTGAGTATCTGGATCTCTTTGGACATCTTCTTGGGGAACGTATCTGCACTTCATTGTGCGGTGCGGTACTCAAGACTTTTACTTTGAGAAAATTAGAGTGTTTCAAGCAGGCACACGCCTTGAATA	99.6	Peridiniales	Kryptoperidiniaceae	Unruhdinium	0	0	0	0	0	0	0	0	0	3	0	0	0	0	0	0	0	0	0	0	0	0	0
OTU_7721	AGCCGCGGTAATTCCAGCTCCAATAGCGTATATTAAAGTTGTTGCGGTTAAAAAGCTCGTAGTTGGATTTCTGTCGAGGGAGACCGGTCCGCCCTCTGGGTGAGTATCTGGATCTCTTTGGACATCTTCTTGGGGAACGTATCTGCACTTCATTGTGCGGTGCGGTACTCAAGACTTTTACTTTGAGGAAATTAGAGTGTTTCAAGCAGGCACACGCCTTGAATA	99.6	Peridiniales	Kryptoperidiniaceae	Unruhdinium	0	0	0	0	0	0	0	0	0	3	0	0	0	0	0	0	0	0	0	0	0	0	0
OTU_7728	AGCCGCGGTAATCCCAGCTCCAATAGCGTATATTAAAGTTGTTGCGGTTAAAAAGCTCGTAGTTGGATTTCTGTCGAAGGAGACCGGTCCGCCCTCTGGGTGAGTATCTGGATCTCTTTGGACATCTTCTTGGGGAACGTATCTGCACTTCATTGTGCGGTGCGGTACTCAAGACTTTTACTTTGAGGAAATTAGAGTGTTTCAAGCAGGCACACGCCTTGAATA	99.6	Peridiniales	Kryptoperidiniaceae	Unruhdinium	0	0	0	0	0	0	0	0	0	3	0	0	0	0	0	0	0	0	0	0	0	0	0
OTU_7744	AGCCGCGGTAATTCCAGCTCCAATAGCGTATATTAAAGTTGTTGCGGTTAAAAAGCTCGTAGTTGGATTTCTGTCGAAGGAGACCGGTCCGCCCTCTGGGTGAGCATCTGGATCTCTTTGGACATCTTCTTGGGGAACGTATCTGCACTTCATTGTGCGGTGCGGTACTCAAGACTTTTACTTTGAGGAAATTAGAGTGTTTCAAGCAGGCACACGCCTTGAATA	99.6	Peridiniales	Kryptoperidiniaceae	Unruhdinium	0	0	0	0	0	0	0	0	0	3	0	0	0	0	0	0	0	0	0	0	0	0	0
OTU_7747	AGCCGCGGTAATTCCAGCTCCAATAGCGTATATTAAAGTTGTTGCGGTTAAAAAGTTCGTAGTTGGATTTCTGTCGAAGGAGACCGGTCCGCCCTCTGGGTGAGTATCTGGATCTCTTTGGACATCTTCTTGGGGAACGTATCTGCACTTCATTGTGCGGTGCGGTACTCAAGACTTTTACTTTGAGGAAATTAGAGTGTTTCAAGCAGGCACACGCCTTGAATA	99.6	Peridiniales	Kryptoperidiniaceae	Unruhdinium	0	0	0	0	0	0	0	0	0	3	0	0	0	0	0	0	0	0	0	0	0	0	0
OTU_9271	AGCCGCGGTAATTCCAGCTCCAATAGCGTATATTAAAGTTGTTGCGGTTAAAAAGCTCGTAGTTTGACCTCTGCTCAGGTAGACTGGTCCGCCCTCTGGGTGAGCATCTGACTTGGCCTGGGCATTTTCTTGGTGATCGCAGCTGCCCTTGACTGTGTGGTGCGGAATTCAGGACATTTACTTTGAGGAAATCAGAGTGTTTCAAGCAGGCATCTGCCTTGAATA	99.6	Gonyaulacales	Ceratiaceae	Ceratium	0	0	0	0	0	0	0	0	0	0	0	0	0.5	0	0	0	0	0	0	0	0	2.4	0
OTU_9334	AGCCGCGGTAATTCCAGCTCCAATAGCGTATATTAAAGTTGTTGCGGTTAAAAAGCTCGTAGTTTGACCTCTGCTCAGGTAGACTGGTCCGCCCTCTGGGTGAGCATCTGGCTTGGCCTGGGCATTTTCTTGGTGATCGCAGCTGCCCTTGACTGTGTGGTGCGGAATTCAGGACATTTACTTTGAGGAAATTAGAGTGTTTCAAGCAGGCACACGCCTTGAATA	98.2	Gonyaulacales	Ceratiaceae	Ceratium	0	0	0	0	0	0	0	0	0	0	0	0	0.5	0	0	0	0	0	0	0	0	2.4	0
OTU_10630	AGCCGCGGTAATTCCAGCTCCAATAGCGTATATTAAAGTTGTTGCGGTTAAAAAGCTCGTAGTTTGACCTCTGCTCAGGTAGACTGGTCCGCCCTCTGGGTGAGCATCTGGCTTGGCCTGGGCATTTTCTTGGTGATCGCAGCTGCCCTTGACTGTGTGGTGCGGAATTCAGGACATTTACTTTGAGGAAATCAGAGTGTTTCAAGAAGGCATCTGCCTTGAATA	99.6	Gonyaulacales	Ceratiaceae	Ceratium	0	0	0	0	0	0	0	0	0	0	0	0	0.5	0	0	0	0	0	0	0	0	2.4	0
OTU_10578	AGCCGCGGTAATTCCAGCTCCAATAGCGTATATTAAAGTTGTTGCGGTTAAAAAGCTCGTAGTTTGACCTCTGCTCAGGTAGACTGGTCCGCCCTCTGGGTGAGCATCTGGCTTGGCCTGGGCATTTTCTTGGTGATCGCAGCTGCCCTTGACTGTGTGGTGCGGAATTCAGGACATTTACTTTGAGGAAATCAGAGTGTTTAAAGCAGGCATCTGCCTTGAATA	99.6	Gonyaulacales	Ceratiaceae	Ceratium	0	0	0.5	0	0	0	0	0	0	0	0	0	0	0	0	0	0	0	0	0	0	2.4	0
OTU_10613	AGCCGCGGTAATTCCAGCTCCAATAGCGTATATTAAAGTTGTTGCGGTTAAAAAGCTCGTAGTTTGACCTCTGCTCAGGTAGACTGGTCCGCCCTCTGGGTGAGCATCTGGCTTGGCCTGGGCATTTTCTTGGTGATCGCAGCTGCCCTTGACTGTGTGGTGCGGAATTCAGGACATTTACTTTGAGGAAATCAGAGTGTTTCAGGCAGGCATCTGCCTTGAATA	99.6	Gonyaulacales	Ceratiaceae	Ceratium	0	0	0.5	0	0	0	0	0	0	0	0	0	0	0	0	0	0	0	0	0	0	2.4	0
OTU_11186	AGCCGCGGTAATTCCAGCTCCAATAGCGTATATTAAAGTTGTTGCGGTTAAAAAGCTCGTAGTTTGACCTCTACTCAGGTAGACTGGTCCGCCCTCTGGGTGAGCATCTGGCTTGGCCTGGGCATTTTCTTGGTGATCGCAGCTGCCCTTGACTGTGTGGTGCGGAATTCAGGACATTTACTTTGAGGAAATCAGAGTGTTTCAAGCAAGCATCTGCCTTGAATA	99.1	Gonyaulacales	Ceratiaceae	Ceratium	0	0	0.5	0	0	0	0	0	0	0	0	0	0	0	0	0	0	0	0	0	0	2.4	0
OTU_10612	AGCCGCGGTAATTCCAGCTCCAATAGCGTATATTAGAGTTGTTGCGGTTAAAAAGCTCGTAGTTTGACCTCTGCTCAGGTAGACTGGTCCGCCCTCTGGGTGAGCATCTGGCTTGGCCTGGGCATTTTCTAGGTGATCGCAGCTGCCCTTGACTGTGTGGTGCGGAATTCAGGACATTTACTTTGAGGAAATCAGAGTGTTTCAAGCAGGCATCTGCCTTGAATA	99.1	Gonyaulacales	Ceratiaceae	Ceratium	0	0	0	0	0	0	0	0	0	0	0	0	0	0	0	0.5	0	0	0	0	0	2.4	0
OTU_10570	AGCCGCGGTAATTCCAGCTCCAATAGCGTATATTAGAGTTGTTGCGGTTAAAAAGCTCGTAGTTTGACCTCTGCTCAGGTAGACTGGTCCGCCCTCTGGGTGAGCATCTGGCTTGGCCTGGGCATTTTCTTGGTGATCGCAGCTGCCCTTGACTGTGTGGTGCGGAATTCAGGACATTTACTTTGAGGAAATCAGAGTGTTTCAAGCAGGCATCTGCCTTGAATA	99.6	Gonyaulacales	Ceratiaceae	Ceratium	0	0	0	0	0	0	0	0	0	0	0	0	0	0.5	0	0	0	0	0	0	0	2.4	0
OTU_10598	AGCCGCGGTAATTCCAGCTCCAATAGCGTATATTAAAGTTGTTGCGGTTAAAAAGCTCGTAGATTGACCTCTGCTCAGGTAGACTGGTCCGCCCTCTGGGTGAGCATCTGGCTTGGCCTGGGCATTTTCTTGGTGATCGCAGCTGCCCTTGACTGTGTGGTGCGGAATTCAGGACATTTACTTTGAGGAAATCAGAGTGTTTCAAGCAGGCATCTGCCTTGAATA	99.6	Gonyaulacales	Ceratiaceae	Ceratium	0	0	0	0	0	0	0	0	0	0	0	0	0	0.5	0	0	0	0	0	0	0	2.4	0
OTU_10603	AGCCGCGGTAATTCCAGCTCCAATAGCGTATATTAAAGTTGTTGCGGTTAAAAAGCTCGTAGTTTGACCTCTGCTCAGGTAGACTGGTCCGCCCTCTGGGTGAACATCTGGCTTGGCCTGGGCATTTTCTTGGTGATCGCAGCTGCCCTTGACTGTGTGGTGCGGAATTCAGGACATTTACTTTGAGGAAATCAGAGTGTTTCAAGCAGGCATCTGCCTTGAATA	99.6	Gonyaulacales	Ceratiaceae	Ceratium	0	0	0	0	0	0	0	0	0	0	0	0	0	0.5	0	0	0	0	0	0	0	2.4	0
OTU_5674	AGCCGCGGTAATTCCAGCTCCAATAGCGTATATTAAAGTTGTTGCGGTAAAAAAGCTCGTAGTTTGACCTCTGCTCAGGTAGACTGGTCCGCCCTCTGGGTGAGCATCTGGCTTGGCCTGGGCATTTTCTTGGTGATCGCAGCTGCCCTTGACTGTGTGGTGCGGAATTCAGGACATTTACTTTGAGGAAATCAGAGTGTTTCAAGCAGGCATCTGCCTTGAATA	99.6	Gonyaulacales	Ceratiaceae	Ceratium	0	0	1	0	0	0.5	0	0	0	0	0	0.9	0	0.5	0	0	0	0	0	0	0	0	0
OTU_4879	AGCCGCGGTAATTCCAGCTCCAATAGCGTATATTAAAGTTGTTGCGGTTAAAAAGCTCGTAGTTTGACCTCTGCTCAGGTAGACTGGTCCGCCCTCTGGGTGAGCATCTGGCTTGGCCTGGGCATTTTCTTGGTGATCGCAGCTGCCCTTGACTGTGTGGTGCGGAATTCAGGACATTTACTTTGAGGAAATCAGAGTGTTTCAAACAGGCATCTGCCTTGAATA	99.6	Gonyaulacales	Ceratiaceae	Ceratium	0	0	0	0	0	0	0	0	0	0	0	0	0	0	0	0	0	0	0	0.5	0	2.4	0
OTU_10601	AGCCGCGGTAATTCCAGCTCCAATAGCGTATATTAAAGTTGTTGCGGTTAAAAAGCTCGTAGTTTGACCTCTGCTCAGGTAGACTGGTCCGCCCTCTGGGTGAGCATCTGGCTTGGCCTAGGCATTTTCTTGGTGATCGCAGCTGCCCTTGACTGTGTGGTGCGGAATTCAGGACATTTACTTTGAGGAAATCAGAGTGTTTCAAGCAGGCATCTGCCTTGAATA	99.6	Gonyaulacales	Ceratiaceae	Ceratium	0	0	0	0	0	0	0	0	0	0	0	0	0	0	0	0	0	0	0	0.5	0	2.4	0
OTU_10806	AGCCGCGGTAATTCCAGCTCCAATAGCGTATATTAAAGTTGTTGCGGTTAAAAAGCTCGTAGTTTGACCTCTGCTCAGGTAGACTGGTCCGCCCTCTGGGTGAGCATCTGGCTTGGCCTGGGCATTTTCTTGGTGATCGCAGCTGCCCTTGACTGTGTGGTGCGGAATTCAGGACATTTACTTTGAGGAAATCAGAGTGTATCAAGCAGGCATCTGCCTTGAATA	99.6	Gonyaulacales	Ceratiaceae	Ceratium	0	0	0	0	0	0.5	0	0	0	0	0	0	0	0	0	0	0	0	0	0	0	2.4	0
OTU_10620	AGCCGCGGTAATTCCAGCTCCAATAGCGTATATTAAAGTTGTTGCGGTTAAAAAGCTCGTAGTTTGACCTCTGCTCAGGTAGACTGGTCCGCCCTCTGGTTGAGCATCTGGCTTGGCCTGGGCATTTTCTTGGTGATCGCAGCTGCCCTTGACTGTGTGGTGCGGAATTCAGGACATTTACTTTGAGGAAATCAGAGTGTTTCAAGCAGGCATCTGCCTTGAATA	99.6	Gonyaulacales	Ceratiaceae	Ceratium	0	0	0	0	0	0.5	0	0	0	0	0	0	0	0	0	0	0	0	0	0	0	2.4	0
OTU_10609	AGCCGCGGTAATTCCAGCTCCAATAGCGTATATTAAAGTTGTTGCGGTTAAAAAGCTCGTAGTTTTACCTCTGCTTAGGTAGACTGGTCCGCCCTCTGGGTGAGCATCTGGCTTGGCCTGGGCATTTTCTTGGTGATCGCAGCTGCCCTTGACTGTGTGGTGCGGAATTCAGGACATTTACTTTGAGGAAATCAGAGTGTTTCAAGCAGGCATCTGCCTTGAATA	99.1	Gonyaulacales	Ceratiaceae	Ceratium	0	0	0	0	0	0.5	0	0	0	0	0	0	0	0	0	0	0	0	0	0	0	2.4	0
OTU_10621	AGCCGCGGTAATTCCAGCTCCAATAGCGTATATTAAAGTTGTTGCGGTTAAAAAGCTCGTAGTTTGACCTCCGCTCAGGTAGACTGGTCCGCCCTCTGGGTGAGCATCTGGCTTGGCCTGGGCATTTTCTTGGTGATCGCAGCTGCCCTTGACTGTGTGGTGCGGAATTCAGGACATTTACTTTGAGGAAATCAGAGTGTTTCAAGCAGGCATCTGCCTTGAATA	99.6	Gonyaulacales	Ceratiaceae	Ceratium	0	0	0	0	0	0.5	0	0	0	0	0	0	0	0	0	0	0	0	0	0	0	2.4	0
OTU_10648	AGCCGCGGTAATTCCAGCTCCAATAGCGTATATTAAAGTTGTTGCGGTTAAAAAGCTCGTAGTTTGACCTCTGCTCAGGTAGACTGGTCCGCCCTCTGGGTGAGCATCTGGCTTGGCCTGGGCATTTTCTTGGTGATCGCAGCTGCCCTTGACTGTCTGGTGCGGAATTCAGGACATTTACTTTGAGGAAATCAGAGTGTTTCAAGCAGGCATCTGCCTTGAATA	99.6	Gonyaulacales	Ceratiaceae	Ceratium	0	0	0	0	0	0.5	0	0	0	0	0	0	0	0	0	0	0	0	0	0	0	2.4	0
OTU_11294	AGCCGCGGTAATTCCAGCTCCAATAGCGTATATTAAAGTTGTTGCGGTTAAAAAGCTCGCAGTTGGATTTCTGTCGAAGGAGACCGGTCCGCCCTCTGGGTGAGTATCTGGATCTCTTTGGACATCTTCTTGGGGAACGTATCTGCACTTCATTGTGCGGTGCGGTACTCAAGACTTTTACTTTGAGGAAATTAGAGTGTTTCAAGCAGGCACACGCCTTGAATA	99.6	Peridiniales	Kryptoperidiniaceae	Unruhdinium	0	0	0	0	0	0	0	0	0	1.5	0	0	0	0	0	0	0	0	1.4	0	0	0	0
OTU_8805	AGCCGCGGTAATTCCAGCTCCAATAGCGTATATTAAGGTTGTTGCGGTTAAAAAGCTCGTAGTTGGATTTCTGCATAGGATGACTGGTCCGCCCTCTGGGTGAGTATCTGGGTCAGCCTCTGCATCTTCATGGAGAACGCAGCTGCACTTGATTGTGTGGTGCGGTATCTGTGACCTTTACTTTGAGGAAATTAGAGTGTTTCAAGCAGGTACGTGCCTGAATAC	99.1	Dinophyceae_X	Tovelliaceae	Tovellia	0	0	0	0	0	0	0	0	0	0	0	0.9	0	0	0	0	0	0	0	0.5	1.5	0	0
OTU_9593	AGCCGCGGTAATTCCAGCTCCAATAGCGTATATTAAAGTTGTTGCGGTTAAAAAGCTCGTAGTTTGACCTCTGCTCAGGTAGACTGGTCCGCCCTCTGGGTGAGCATCTGGCTTGGCCTGGGCATTTTCTTGGTGATCGCAGCTGCCCTTGACTGTGTGGTGCGGAATTCAGGACATTTACTTTGAGGAAATCAGAGTGTTCAAGCAGGCATCTGCCTTGAATAA	100	Gonyaulacales	Ceratiaceae	Ceratium	0	0	0	0	0	0	0	0	0	0	0	0	0	0	0.4	0	0	0	0	0	0	2.4	0
OTU_10575	AGCCGCGGTAATTCCAGCTCCAATAGCGTATATTAAAGTTGTTGCGGTTAAAAAGCTCGTAGTTTGACCTCTGCTCAGGTAGACTGGTCCGCCCTCTGGGTGAGCATCTGGCTTGGCCTGGGCATTTTCTTGGTGATCGCAGCTGCCCTTGACTGTGTGGTGCGGAATTCAGGACATTTACTTTGAGGAAATCAGAATGTTTCAAGCAGGCATCTGCCTTGAATA	99.6	Gonyaulacales	Ceratiaceae	Ceratium	0	0	0	0	0	0	0	0	0	0	0	0	0	0	0.4	0	0	0	0	0	0	2.4	0
OTU_10615	AGCCGCGGTAATTCCAGCTCCAATAGCGTATATTAAAGATGTTGCGGTTAAAAAGCTCGTAGTTTGACCTCTGCTCAGGTAGACTGGTCCGCCCTCTGGGTGAGCATCTGGCTTGGCCTGGGCATTTTCTTGGTGATCGCAGCTGCCCTTGACTGTGTGGTGCGGAATTCAGGACATTTACTTTGAGGAAATCAGAGTGTTTCAAGCAGGCATCTGCCTTGAATA	99.6	Gonyaulacales	Ceratiaceae	Ceratium	0	0	0	0	0	0	0	0	0	0	0	0	0	0	0.4	0	0	0	0	0	0	2.4	0
OTU_9788	AGCCGCGGTAATTCCAGCTCCAATAGCGTATATTAAAGTTGTTGCGGTTAAAAAGCTCGTAGTTTGACCTCTGCTCAGGTAGACTGGTCCGCCCTCTGGGTGAGCATCTGGCTTGGCCTGGGCATTTTCTTGGTGATCGCAGCTGCCCTTGACTGTGTGGTGCGGAATTCAGGACATTTACTTTGAGGAAATCAGAGTGTTTTAAGCAGGCATCTGCCTTGAATA	99.6	Gonyaulacales	Ceratiaceae	Ceratium	0	0	0	0	0	0	0	0	0	0	0	0	0	0	0.4	0	0	0	0	0	0	2.4	0
OTU_7720	AGCCGCGGTAATTCCAGCTCCAATAGCGTATATTAAAGTTGTTGCGGTTAAAAAGCTCGTAGTTGGATTTCTGTCGAAGGAGACCGGTCCGCCCTCTGGGTGAGTATCTGGATCTCTTTGGACATCTTCTTGGGGAACGTATCTGCACTTCATTGTGCGGTGCGGTACTCAAGACTTTTACTTTGGGGAAATTAGAGTGTTTCAAGCAGGCACACGCCTTGAATA	99.6	Peridiniales	Kryptoperidiniaceae	Unruhdinium	0	0	0	0	0	0	0	0	0	2.2	0	0	0.5	0	0	0	0	0	0	0	0	0	0
OTU_9338	AGCCGCGGTAATTCCAGCTCCAATAGCGTATATTAAAGTTGTTGCGGTTAAAAAGCTCGTAGTTGGATTTCTGTCGAAGGAGACCGGTCCGCCCTCTGGGTGAGTATCTGGATCTCTTTGGACATCTTCTTGGGGAATGTATCTGCACTTCATTGTGCGGTGCGGTACTCAAGACTTTTACTTTGAGGAAATTAGAGTGTTTCAAGCAGGCACACGCCTTGAATA	99.6	Peridiniales	Kryptoperidiniaceae	Unruhdinium	0	0	0	0	0	0	0	0	0	0.7	1.5	0	0.5	0	0	0	0	0	0	0	0	0	0
OTU_6302	AGCCGCGGTAATTCCAGCTCCAATAGCGTATATTAAAGTTGTTGCGGTTAAAAAGCTCGTAGTTGGATTTCTGCATAGGATGACTGGTCCGCCCTCTGGGTGAGTATCTGGGTCGGCCTGTGCATCTTCGTGGAGAACGCAGCTGCACTTGATTGTGTGGTGCGGTATCTGCGACCTTTACTTTGAGGAAATTAGAGTGCTTCAAGCAGGTATTCGCCTGAATAC	96.9	Dinophyceae_X	Tovelliaceae	Woloszynskia	0	0	0	0	0	0	0	0	0	0	0	0.9	0	0	0	0	0	0	1.4	0.5	0	0	0
OTU_7051	AGCCGCGGTAATTCCAGCTCCAATAGCGTATATTAAAGTTGTTGCGGTTAAAAAGCTCGTAGTTGGATTTCTGTCGAAGGAGACCGGTCCGCCCTCTGGGTGAGTATCTGGATCTCTTTGGACATCTTCTTGGGGAGCGTATCTGCACTTCATTGTGCGGTGCGGTACTCAAGACTTTTACTTTGAGGAAATTAGAGTGTTTCAAGCAGGCACACGCCTTGAATA	99.6	Peridiniales	Kryptoperidiniaceae	Unruhdinium	0	0	0	0	0	0	0	0	0	2.2	0	0	0	0	0	0.5	0	0	0	0	0	0	0
OTU_6793	AGCCGCGGTAATTCCAGCTCCAATAGCGTATATTAAAGTTGTTGCAGTTAAAAAGCTCGTAGTTGGATTTCTGTCGAGGACGACCGGTCCGCCCTCTGGGTGAGTATCTGGCTCGGCCTGGACATCTTCTTGGGGAACGTGTCTGCACTTCATTGTGCGGTGCGGTACTCAAGACTTTTACTTTGAGGAAATTAGAGTGTTTCAAGCAGGCACACGCCTTGAATA	98.2	Peridiniales	Kryptoperidiniaceae	Unruhdinium	0	0	0	0	0	0	0	0	0	0	0	1.8	0.5	0	0.4	0	0	0	0	0	0	0	0
OTU_8544	AGCCGCGGTAATTCCAGCTCCAATAGCGTATATTAAAGTTGTTGCGGTTAAAAAGCTCGTAGTTGGATTTCTGTTCAGGACGACCGGTCCGCCCTCTGGGTGTGTATCTGGCTCGGCCTGGGCATCTTCTTGGAGAACGTCGCTGCACTTGACTGTGTGGCACGGTATCCAGGACTTTTACTTTGAGGAAATTAGAGTGTTTCAAGCAGGCACACGCCTTGAATA	97.8	Gymnodiniales	Gymnodiniaceae	Gyrodiniellum	0	0	0	0	0	0	0	0	1.9	0.7	0	0	0	0	0	0	0	0	0	0	0	0	0
OTU_5874	AGCCGCGGTAATTCCAGCTCCAATAGCGTATATTAAAGTTGTTGCGGTTAAAAAGCTCGTAGTTGGATTTCTGCTGAGGACGACCGGTCCGCCCTCTGGGTGAGTATCTGGCTCGGCCTTGGCATCTTCTTGGAGAACGTGCTGCACTTGACTGTGTGGTTCGGCATCCAGGACCTTTACTTTGAGAAAATTAGAGTGTTTCAAGCAGGCACATGCCTTGAATAC	98.2	Dinophyceae_X	Dinophyceae_XX	Dinophyceae_XXX	2.7	0	0	0	0	0	0	0	0	0	0	0	0	0	0	0	0	0	0	0	0	0	0
OTU_10587	AGCCGCGGTAATTCCAGCTCCAATAGCGTATATTAAAGTTGTTGCGGTTAAAAAGCTCGTAGTTTGACCTCTGCTCAGGTAGACTGGTCCGCCCTCTGGGTGAGCATCTGGCTTGGCCTGGGCATTTTCTCGGTGATCGCAGCTGCCCTTGACTGTGTGGTGCGGAATTCAGGACATTTACTTTGAGGAAATCAGAGTGTTTCAAGCAGGCATCTGCCTTGAATA	99.6	Gonyaulacales	Ceratiaceae	Ceratium	0	0	0	0	0	0	0	0	0	0	0	0	0	0	0	0	0.2	0	0	0	0	2.4	0
OTU_5747	AGCCGCGGTAATTCCAGCTCCAATAGCGTATATTAAAGTTGTTGCGGTTAAAAAGCTCGTAGTTGGATTTCTGCTGAGGATGACCGGTCCGCCTTCTGGGTGAGTATCTGGCTCTTTCTTAGCATCTTCTTGGGGAACGTATCTGCACTTGATTGTGTGGTGCGGTATCCTTGACTTTTACTTTGAGGAACTTAGAGTGTTTCAAGCAGGCTTGTGCCTTGAATA	99.6	Dinophyceae_X	Dinophyceae_XX	Dinophyceae_XXX	0	0	2.6	0	0	0	0	0	0	0	0	0	0	0	0	0	0	0	0	0	0	0	0
OTU_7400	AGCCGCGGTAATTCCAGCTCCAATAGCGTATATTAAAGTTGTTGCGGTTAAAAAGCTCGTAGTTTGACCTCTGCTCAGGTAGACTGGTCCGCCCTCTGGGTGAGCATCTGGCTTGGCCTGGGCATTTTCTTGGTGATCGCAGCTGCCCTTGACTGTGTGGTGCGGAATTCAGAACATTTACTTTGAGGAAATCAGAGTGTTTCAAGCAGGCATCTGCCTTGAATA	99.6	Gonyaulacales	Ceratiaceae	Ceratium	0	0	0	0	0	0.5	0	0	0	0	0	0	0	0.5	0	0	0	0	0	0.5	0	1.2	0
OTU_7308	AGCCGCGGTAATTCCAGCTCCAATAGCGTATATTAAAGTTGTTGCGGCTAAAACGCTCGTAGTTGGACCTCTGCCGAGAACGACTGGTCCGCCCTCTGGGTGAGTATCTGGCTCGGGCTGGGCATCTTCTTGGAAAGCGTAGCTGCGCTTGACTGTGTGGCGCGGTGTCCAAGACTTTTACTTTGAGGAAATTAGAGTGCTTCAAGCAGGCGCACGCCCTGAATA	97.3	Peridiniales	Peridiniaceae	Peridinium	0	0	0	0	0	0.5	0	0	0	0	0	0	0	0	0	0	0	0	0	0.9	0	1.2	0
OTU_6249	AGCCGCGGTAATTCCAGCTCCAATAGCGTATATTAAAGTTGTTGCGGTTAAAAAGCTCGTAGTTTGACCTCTGCTCAGGTAGACTGGTCCGCCCTCTGGGTGAGCATCTGGCTTGGCCTGGGCATTTTCTTGGTGATCGCAGCTGCCCTTGACTGTGTGGTGCGGAATTCAGGACATTTACTTTGAGGAAATCAGAGTGTTTCAAGCAGGCATCTGCCTTGTATA	99.6	Gonyaulacales	Ceratiaceae	Ceratium	0	0	0	0	0	0.5	0	0	0	0	0	0.9	0	0	0	0	0	0	0	0	0	1.2	0
OTU_10555	AGCCGCGGTAATTCCAGCTCCAATAGCGTATATTAAAGTTGTTGCGGTTAAAAAGCTCGTAGTTTGACCTCTGCTCAGGTAGACTGGTCCGCCCTCTGGGTAAGCATCTGGCTTGGCCTGGGCATTTTCTTGGTGATCGCAGCTGCCCTTGACTGTGTGGTGCGGAATTCAGGACATTTACTTTGAGGAAATCAGAGTGTTTCAAGCAGGCATCTGCCTTGAATA	99.6	Gonyaulacales	Ceratiaceae	Ceratium	0	0	0	0	0	0	0	0	0	0	0	0	0	0	0.4	0	0	0	0	0	0	1.2	1
OTU_5160	AGCCGCGGTAATTCCAGCTCCAATAGCGTATATTAAAGTTGTTGCGGTTAAAAAGCTCGTAGTTGGATTTCTGCTGAGGACGACCGGTCCGCCCACTGGGTGAGTATCTGGCTTGGCCTTGGCATCTTCTTGGACAAGGTATCTGCACTTCATTGTGTGGTGCTGCATCCAAGACTTTTACTTTGAGAAAATTAGAGTGTTTCAAGCAGGCACACGCCTTGAATA	96	Gymnodiniales	Gymnodiniaceae	Gyrodinium	0	0	0	0	0	0	0	0	0	0	0	0	2.1	0	0.4	0	0	0	0	0	0	0	0
OTU_8786	AGCCGCGGTAATTCCAGCTCCAATAGCGTATATTAATGTTGTTGCGGTTAAAAAGCTCGTAGTTTGACCTCTGCTCAGGTAGACTGGTCCGCCCTCTGGGTGAGCATCTGGCTTGGCCTGGGCATTTTCTTGGTGATCGCAGCTGCCCTTGACTGTGTGGTGCGGAATTCAGGACATTTACTTTGAGGAAATCAGAGTGTTTCAAGCAGGCATCTGCCTTGAATA	99.6	Gonyaulacales	Ceratiaceae	Ceratium	0	0	0.5	0	0	0	0	0	0	0	0	0	0	0	0	0	0	0	0	0.5	1.5	0	0
OTU_10590	AGCCGCGGTAATTCCAGCTCCAATAGCGTATATTAAAGTTGTTGCGGTTAAAAAGCTCGTAGTTTGACCTCTGCTCAGGTAGACTGGTCAGCCCTCTGGGTGAGCATCTGGCTTGGCCTGGGCATTTTCTTGGTGATCGCAGCTGCCCTTGACTGTGTGGTGCGGAATTCAGGACATTTACTTTGAGGAAATCAGAGTGTTTCAAGCAGGCATCTGCCTTGAATA	99.6	Gonyaulacales	Ceratiaceae	Ceratium	0	0	0	0	0	0	0	0	0	0	0	0.9	0	0	0.4	0	0	0	0	0	0	1.2	0
OTU_11452	AGCCGCGGTAATTCCAGCTCCAATAGCGGATATTAAAGTTGTTGCGGTTAAAAAGCTCGTAGTTTGACCTCTGCTCAGGTAGACTGGTCCGCCCTCTGGGTGAGCATCTGGCTTGGCCTGGGCATTTTCTTGGTGATCGCAGCTGCCCTTGACTGTGTGGTGCGGAATTCAGGACATTTACTTTGAGGAAATCAGAGTGTTTCAAGCAGGCATCTGCCTTGAATA	99.6	Gonyaulacales	Ceratiaceae	Ceratium	0	0	0	0	0	0	0	0	0	0	0	0.9	0	0	0.4	0	0	0	0	0	0	1.2	0
OTU_9761	AGCCGCGGTAATTCCAGCTCCAATAGCGTATATTAAAGTTGTTGCGGTTAAAAAGCTCGTAGTTTGACCTCTGCTCAGGTAGACTGGTCCGCCCTCTGGGTGAGCATCTGGCTTGGCCTGGGCATTTTCTTGGTGATCGCAGCTGCACTTGACTGTGTGGTGCGGTATCCAGGACTTTTACTTTGAGGAAATTAGAGTGTTTCAAGCAGGCACACGCCTTGAATA	96.4	Gonyaulacales	Ceratiaceae	Ceratium	0	0	0	0	0	0	0	0	0	0	0	0.9	0	0	0.4	0	0	0	0	0	0	1.2	0
OTU_7700	AGCCGCGGTAATTCCAGCTCCAATAGCGTATATTAAAGTTGTTGCGGTTAAAAAGCTCGTAGTTGGATTTCTGTCGAAGGAGACCGGTCCGCCCTCTGGGTGAGTATCTGGATCTCTTTGGACATCTTCTTGGGGAACGTATCTGCACTTCATTGTGCGGTGCGGTACTCAAGACCTTTACTTTGAGGAAATTAGAGTGTTTCAAGCAGGCACACGCCTTGAATA	99.6	Peridiniales	Kryptoperidiniaceae	Unruhdinium	0	0	0	0	0	0	0	0	0	2.2	0	0	0	0	0	0	0.2	0	0	0	0	0	0
OTU_11226	AGCCGCGGTAATTCCAGCTCCAATAGCGTATATTAAAGTTGTTGCGGTTAAAAAGCTCGTAGTTTGACCTCTGCTCAGGTAGACTGGTCCGCCCTCTGGGTGAGCATCTGTCTTGGCCTGGGCATTTTCTTGGTGATCGCAGCTGCCCTTGACTGTGTGGTGCGGAATTCAGGACATTTACTTTGAGGAAATCAGAGTGTTTCAAGCAGGCATCTGCCTTGAATA	99.6	Gonyaulacales	Ceratiaceae	Ceratium	0	0	0	0	0	0	0	0	0	0.7	0	0	0	0.5	0	0	0	0	0	0	0	1.2	0
OTU_10589	AGCCGCGGTAATTCCAGCTCCAATAGCGTATATTAAAGTTGTTGCGGTTAAAAAGCTCGTAGTTTGACCTCTGCTCAGGTAGACTGGTCCGCCCTCTGGGTGAGCATCTGGCTTGGCCTGGGCATTTTCTTGGTGATCGCAGCTGCCCTTGACTGTGTGGTGCGGATTTCAGGACATTTACTTTGAGGAAATCAGAGTGTTTCAAGCAGGCATCTGCCTTGAATA	99.6	Gonyaulacales	Ceratiaceae	Ceratium	0	0	0	0	0	0	0	0	0	0.7	0	0	0	0.5	0	0	0	0	0	0	0	1.2	0
OTU_8841	AGCCGCGGTAATTCCAGCTCCAATAGCGTATATTAAAGTTGTTGCAGTTAAAAAGCTCGTAGTTGGATTTCTGCCGAGGACGACCGGTCCGCCCACTGGGTGTGCATCTGGTTCGGCCTGGGCATCTTCTTGGAGAACGTATTTGCACTTTACTGTGTGGTGCGGTATCCAGGACTTTTACTTTGAGGAAATTAGAGTGTTTCAAGCAGGCACACGCCTTGAATA	98.7	Peridiniales	Thoracosphaeraceae	Thoracosphaeraceae_X	0	0	0	0	0	0	0	0	0	0	0	0	0	0	0	0	0	0	0	0.9	1.5	0	0
OTU_11235	AGCCGCGGTAATTCCAGCTCCAATAGCGTATATTAAAGTTGTTGCGGTTAAAAAGCTCGTAGTTGGATTTCTGTCGAAGGAGACCGGTCCGCCCTCTGGGTGAGTATCTGGATCTCTTTGGACATCTTCTTGGGGAACGTATCTGCACTTCATTGTGCGGTGCGGTACTCAATACTTTTACTTTGAGGAAATTAGAGTGTTTCAAGCAGGCACACGCCTTGAATA	99.6	Peridiniales	Kryptoperidiniaceae	Unruhdinium	0	0	0	0	0	0	0	0	0	1.5	0	0.9	0	0	0	0	0	0	0	0	0	0	0
OTU_10293	AGCCGCGGTAATTCCAGCTCCAATAGCGTATATTAAAGTTGTTGCGGTTAAAAAGCTCGTAGTTGGATTTCTGCATAGGATGACTGGTCCGCCCTCTGGGTGAGTATCTGGGTCGGCCTGTGCATCTTCGTGGTGAACGCAGCTGCACTTGATTGTGTGGTGCGGTATCTGCGACCTTTACTTTGAGGAAATTAGAGTGTTTCAAGCAGGTATTCGCCTGAATAC	96.9	Dinophyceae_X	Tovelliaceae	Woloszynskia	0	0	0	0	0	0	0	0	0	0	0	0	0	0	0	0	0	0	1.4	0.9	0	0	0
OTU_11397	AGCCGCGGTAATTCCAGCTCCAATAGCGTATATTAAAGTTGTTGCGGTTAAAAAGCTCGTAGTTGGATTTCTGTTCAGGACGACCGGTCCGCCCTCTGGGTGTGTATCTGGCTCGGCCTGGGCATCTTCTTGGAGAACGTTGCTGCACTTGACTGTGTGGCACGGTATCCAGGACTTTTACTTTGAGGAAATTAGAGTGTTTCAAGCAGGCACACGCCTTGAATA	97.8	Gymnodiniales	Gymnodiniaceae	Gyrodiniellum	0	0	0	0	0	0	0	0	0	0	0	1.8	0	0	0	0.5	0	0	0	0	0	0	0
OTU_11123	AGCCGCGGTAATTCCAGCTCCAGTAGCGTATATTAAATTTGTTGCGGTTAAAAAGCTCGTAGTTGAATATATGACTTTTATCTTCACAGATTTAAGTCCAAGTTTTTGTATACTTTGAGAAAAATAGAGCGTTACAAACAAGCAATTGCAGTGTATATATTAGCATGGTATGTTTTTAGAGTGTCTCTCGTAGTTAGAAGAGTATTCTTGTTTGGATAGGGATAG	99.5	Dino-Group-I	Dino-Group-I-Clade-4	Dino-Group-I-Clade-4_X	0	0	1	0	0	0	0	0	0	0	0	0	0	0	0	0	0	0	0	0	0	1.2	0
OTU_9261	AGCCGCGGTAATTCCAGCTCCAATAGCGTATATTAAAGTTGTTGCGGTTAAAAAGCTCGTAGTTTGACCTCTGCTCAGGTAGACTGGTCCGCCCTCTGGGTGAGCATCTGGCTTGGCCTGGGCATTTTCTTGGTGATCGCAGCTGCCCTTGACTGTGTGGTGCGGAATTCTGGACATTTACTTTGAGGAAATCAGAGTGTTTCAAGCAGGCATCTGCCTTGAATA	99.6	Gonyaulacales	Ceratiaceae	Ceratium	0	0	0	0	0	0	0	0	0	0.7	0	0	0.5	0	0	0	0	0	0	0	0	0	1
OTU_9853	AGCCGCGGTAATTCCAGCTCCAATAGCGTATATTAAAGTTGTTGCGGTTAAAAAGCTCGTAGTTTGACCTCTGCTCAGGTAGACTGGTCCGCCCTCTGGGTGAGCATCTGGCTTGGCCTGGGCATTTTCTTGGTGATCGCAGCTGCCCTTGACTGTGTGGTGCGGAATTCAGGACATATACTTTGAGGAAATCAGAGTGTTTCAAGCAGGCATCTGCCTTGAATA	99.6	Gonyaulacales	Ceratiaceae	Ceratium	0	0	0	0	0	0	0	0	0	0	0	0	0.5	0	0	0.5	0	0	0	0	0	1.2	0
OTU_11212	AGCCGCGGTAATTCCAGCTCCAATAGCGTATATTAAAGTTGTTGCGGTTAAAAAGCTCGTAGTTGGATTTCTGTCGAAGGAGACCGGTCCGCCCTCTGGGTGAGTATCTGGATCTCTTTGGACGTCTTCTTGGGGAACGTATCTGCACTTCATTGTGCGGTGCGGTACTCAAGACTTTTACTTTGAGGAAATTAGAGTGTTTCAAGCAGGCACACGCCTTGAATA	99.6	Peridiniales	Kryptoperidiniaceae	Unruhdinium	0	0	0	0	0	0	0	0	0	2.2	0	0	0	0	0	0	0	0	0	0	0	0	0
OTU_11218	AGCCGCGGTAATTCCAGCTCCAATAGCGTATATTAAAGTTGTTGCGGTTAAAAAGCTCGTAGTTGGGTTTCTGTCGAAGGAGACCGGTCCGCCCTCTGGGTGAGTATCTGGATCTCTTTGGACATCTTCTTGGGGAACGTATCTGCACTTCATTGTGCGGTGCGGTACTCAAGACTTTTACTTTGAGGAAATTAGAGTGTTTCAAGCAGGCACACGCCTTGAATA	99.6	Peridiniales	Kryptoperidiniaceae	Unruhdinium	0	0	0	0	0	0	0	0	0	2.2	0	0	0	0	0	0	0	0	0	0	0	0	0
OTU_11221	AGCCGCGGTAATTCCAGCTCCAATAGCGTATATTAAAGTTGTTGCGGTTAAAAAGCTCGTAGTTGGATTTCTGTCGAAGGAGACCGGTCCGCCCTCTGGGTGAGTATCTGGATCTCTTTGGACATCTTCTTGGGGAACGTATCTGCACTTCATTGTGCGGTGCGGTACTCAAGACTGTTACTTTGAGGAAATTAGAGTGTTTCAAGCAGGCACACGCCTTGAATA	99.6	Peridiniales	Kryptoperidiniaceae	Unruhdinium	0	0	0	0	0	0	0	0	0	2.2	0	0	0	0	0	0	0	0	0	0	0	0	0
OTU_11263	AGCCGCGGTAATTCCAGCTCCAATAGCGTATATTAAAGTTGTTGCGGTTAAAAAGCTCGTAGTTGGATTTCTGTCGAAGGAGACCGGTCCGCCCTCTGGGTGAGTATCTGGATCTCTTTGGACATCTTCTTGGGGAACGTATCTGCACTTCATTGTGCGGTGCGGTACTCAAGACTTTTACTTTGAGGAAATTAGAGTGTTTCAAGTAGGCACACGCCTTGAATA	99.6	Peridiniales	Kryptoperidiniaceae	Unruhdinium	0	0	0	0	0	0	0	0	0	2.2	0	0	0	0	0	0	0	0	0	0	0	0	0
OTU_11239	AGCCGCGGTAATTCCAGCTCCAATAGCGTATATTAAAGTTGTTGCGGTTAAAAAGCTCGTAGTTGGATTTCTGTCGAAGGAGACCGGTCCGCCCTCTGGGTGAGTATCTGGATCTCTTTGGACATCTTCTTGGGGAACGTATCTGCACTTCATTGTGCGGTGCGGTACTCAAGACTTTTACTTTGAGGAAATTAGAGTGTTTCAAGCAGGCACCCGCCTTGAATA	99.6	Peridiniales	Kryptoperidiniaceae	Unruhdinium	0	0	0	0	0	0	0	0	0	2.2	0	0	0	0	0	0	0	0	0	0	0	0	0
OTU_11257	AGCCGCGGTAATTCCAGCTCCAATAGCGTATATTAAAGTTGTTGCGGTTAAAAAGCTCGTAGTTGGATTTCTGTCGAAGGAGACCGGTCTGCCCTCTGGGTGAGTATCTGGATCTCTTTGGACATCTTCTTGGGGAACGTATCTGCACTTCATTGTGCGGTGCGGTACTCAAGACTTTTACTTTGAGGAAATTAGAGTGTTTCAAGCAGGCACACGCCTTGAATA	99.6	Peridiniales	Kryptoperidiniaceae	Unruhdinium	0	0	0	0	0	0	0	0	0	2.2	0	0	0	0	0	0	0	0	0	0	0	0	0
OTU_11251	AGCCGCGGTAATTCCAGCTCCAATAGCGTATATTAAAGTTGTTGCGGTTAAAAAGCTCGTAGTTGGATTTCTGTCGAAGGAGACCGGTCCGCCCTCTGGGTGAGTATCTGGATCTCTTTGGACATCTTCTTGGGGAACGTATCTGCACTTCATTGTGCGGTGCGGTACTCAAGACTTTTACTTTGAGGCAATTAGAGTGTTTCAAGCAGGCACACGCCTTGAATA	99.6	Peridiniales	Kryptoperidiniaceae	Unruhdinium	0	0	0	0	0	0	0	0	0	2.2	0	0	0	0	0	0	0	0	0	0	0	0	0
OTU_11246	AGCCGCGGTAATTCCAGCTCCAATAGCGTATATTAAAGTTGTTGCGGTTAAAAAGCTCGTAGTTGGATTTCTGTCGAAGGAGACCGGTCCGCCCTCTGGGTGAGTATCCGGATCTCTTTGGACATCTTCTTGGGGAACGTATCTGCACTTCATTGTGCGGTGCGGTACTCAAGACTTTTACTTTGAGGAAATTAGAGTGTTTCAAGCAGGCACACGCCTTGAATA	99.6	Peridiniales	Kryptoperidiniaceae	Unruhdinium	0	0	0	0	0	0	0	0	0	2.2	0	0	0	0	0	0	0	0	0	0	0	0	0
OTU_11254	AGCCGCGGTAATTCCAGCTCCAATAGCGTATATTAAAGTTGTTGCGGTTAAAAAGCTCGTAGTTGGATTTCTGTCGAAGGAGACCGGTCCGCCCTCTGGGTGAGTATCTGGATCTCTTTGGACATCTTCTTGGGGAACGTATCTGCACTTCATTGTGCGGTGCGGTACTCAAGACTTTTACTTTGAGGAAATTAGAGTGTTTCAAGCAGGCACACGCCTTGACTA	100	Peridiniales	Kryptoperidiniaceae	Unruhdinium	0	0	0	0	0	0	0	0	0	2.2	0	0	0	0	0	0	0	0	0	0	0	0	0
OTU_11260	AGCCGCGGTAATTCCAGCTCCAATAGCGTATATTAAAGTTGTTGCGGTTGAAAAGCTCGTAGTTGGATTTCTGTCGAAGGAGACCGGTCCGCCCTCTGGGTGAGTATCTGGATCTCTTTGGACATCTTCTTGGGGAACGTATCTGCACTTCATTGTGCGGTGCGGTACTCAAGACTTTTACTTTGAGGAAATTAGAGTGTTTCAAGCAGGCACACGCCTTGAATA	99.6	Peridiniales	Kryptoperidiniaceae	Unruhdinium	0	0	0	0	0	0	0	0	0	2.2	0	0	0	0	0	0	0	0	0	0	0	0	0
OTU_11265	AGCCGCGGTAATTCCAGCTCCAATAGCGTATATTAAAGTTGTTGCGGTTAAAAAGCTCGTAGTTGGATTTCTGTCGAAGGAGACCGGTCCGCCCTCTGGGTGAGTATCTGGATCTCTTTGGACATCTTCTTGGGGAACGTATCTGCACTTCATTGTGCGGTGCGGTACTCAAGACTTTTACTTTGAGGAAATTAGAGTGTTTCAAGCAGGCACACGCCTTGAATC	100	Peridiniales	Kryptoperidiniaceae	Unruhdinium	0	0	0	0	0	0	0	0	0	2.2	0	0	0	0	0	0	0	0	0	0	0	0	0
OTU_11284	AGCCGCGGTAATTCCAGCTCCAATAGCGTATATTAAAGTTGTTGCGGTTAAAAAGCTCGTAGTTGGATTTCTGTCGAAGGAGACCGGTCCGCCCTCTGGGTGAGTATCTGGATCTCTTTGGACATCTTCTTGGGGAACGTATCTGCGCTTCATTGTGCGGTGCGGTACTCAAGACTTTTACTTTGAGGAAATTAGAGTGTTTCAAGCAGGCACACGCCTTGAATA	99.6	Peridiniales	Kryptoperidiniaceae	Unruhdinium	0	0	0	0	0	0	0	0	0	2.2	0	0	0	0	0	0	0	0	0	0	0	0	0
OTU_11298	AGCCGCGGTAATTCCAGCTCCAATAGCGTATATTAAAGTTGTTGCGGTTAAAAAGCTCGTAGTTGGATTTCTGTCGAAGGAGACCGGTCCGCCCTCTGGGTGAGTATCTGGATCTCTTTGGACATCTTCTTGGGGAACGTATCTGCACTTCATTGTGCGGTGCGGTACTCAAGACTTTTACTTTTAGGAAATTAGAGTGTTTCAAGCAGGCACACGCCTTGAATA	99.6	Peridiniales	Kryptoperidiniaceae	Unruhdinium	0	0	0	0	0	0	0	0	0	2.2	0	0	0	0	0	0	0	0	0	0	0	0	0
OTU_11291	AGCCGCGGTAATTCCAGCTCCAATAGCGTATATTAAAGTTGTTGCGGTTAGAAAGCTCGTAGTTGGATTTCTGTCGAAGGAGACCGGTCCGCCCTCTGGGTGAGTATCTGGATCTCTTTGGACATCTTCTTGGGGAACGTATCTGCACTTCATTGTGCGGTGCGGTACTCAAGACTTTTACTTTGAGGAAATTAGAGTGTTTCAAGCAGGCACACGCCTTGAATA	99.6	Peridiniales	Kryptoperidiniaceae	Unruhdinium	0	0	0	0	0	0	0	0	0	2.2	0	0	0	0	0	0	0	0	0	0	0	0	0
OTU_11312	AGCCGCGGTAATTCCAGCTCCAATAGCGTATATTAAAGTTGTTGCGGTTAAAAAGCTCGTAGTTGGATTTCTGTCGAAGGAGACCGGTCCGCCCTCTGGGTGAGTATCTGGATCTCTTTGGACATCTTCTTGGGGAACGTATCTGCACTTCATTGTGCGGTGCGGTACTCAAGACTTTTACCTTGAGGAAATTAGAGTGTTTCAAGCAGGCACACGCCTTGAATA	99.6	Peridiniales	Kryptoperidiniaceae	Unruhdinium	0	0	0	0	0	0	0	0	0	2.2	0	0	0	0	0	0	0	0	0	0	0	0	0
OTU_11258	AGCCGCGGTAATTCCAGCTCCAGTAGCGTATATTAAAGTTGTTGCGGTTAAAAAGCTCGTAGTTGGATTTCTGCCGAGGACGACCGACCGACCCATACGGGTTTGTGTCTGGTTAGACCGAGGCATCCTCTTGGAAGACGTGCTCCGATTTACTTCGGACACGGAGTCCAGGACTTTTACTTTGAGGAAATTAGAGTGTTTCAAACAGGCGTTTGCCGTGAATAC	97.8	Prorocentrales	Prorocentraceae	Prorocentrum	0	0	0	0	0	0	0	0	0	2.2	0	0	0	0	0	0	0	0	0	0	0	0	0
OTU_11184	AGCCGCGGTAATTCCAGCTCCAATAGCGTATATTAAAGTTGTTGCGGTTAAAAAGCTCGTAGTTTGACCTCTGCTCAGGTAGACTGGTCCGCCCTCTGGGTGAGCATCTGGCTTGGCCTGGGCATTTTCTTGGTGATCGCAGCTGCCCTAGACTGTGTGGTGCGGAATTCAGGACATTTACTTTGAGGAAATCAGAGTGTTTCAAGCAGGCATCTGCCTTGAATA	99.6	Gonyaulacales	Ceratiaceae	Ceratium	0	0	0.5	0	0	0	0	0	0	0	0	0	0	0	0	0	0	0	0	0.5	0	1.2	0
OTU_11280	AGCCGCGGTAATTCCAGCTCCAATAGCGTATATTAAAGTTGTTGCGGTTAAAAAGCTCGTAGTTTGACCTCTGCTCAGGTAGACTGGTCCGCCCTCTGGGTGAGCATCTGGCTTGGCCTGGGCATTTTCTTGGTGATCGCAGCTGCCCTTGACTATGTGGTGCGGAATTCAGGACATTTACTTTGAGGAAATCAGAGTGTTTCAAGCAGGCATCTGCCTTGAATA	99.6	Gonyaulacales	Ceratiaceae	Ceratium	0	0	0	0	0	0	0	0	0	0.7	0	0	0	0	0	0	0.2	0	0	0	0	1.2	0
OTU_11456	AGCCGCGGTAATTCCAGCTCCAATAGCGTATATTAAAGTTGTTGCGGTTAAAAAGCTCGTAGTTGGATTTCTGCTGGGGACGACCGGTCCGCCCTCTGGGTGAGTATCTGGATCTGCCTTGGCATCTCCTTGGGGAACGTAGCTGCACTTGACTGCGTGGTGCGGAATCCAGGGCATTTACTTTGAGAAAATTAGAGTGTTTCAAGCAGGCACAAGCCTTGAATA	99.6	Dinophyceae_X	Dinophyceae_XX	Dinophyceae_XXX	0	0	0	0	0	0	0	0	0	0	0	1.8	0	0	0.4	0	0	0	0	0	0	0	0
OTU_10605	AGCCGCGGTAATTCCAGCTCCAATAGCGTATATTAAAGTTGTTGCGGTTAAAAAGCTCGTAGTTTGACCTCTGCTCAGGTAGACTGGTCCGCCCTCTGGGTGAGCATCTGGCTTGGCCTGGGCATTTTCTTGGTGATCGCAGCTGCCCTTGACTGTGTGGTGCGGAATTCAGGACATTTACTTTTGAGGAAATCAGAGTGTTTCAAGCAGGCATCTGCCTTGAAT	99.6	Gonyaulacales	Ceratiaceae	Ceratium	0	0	0	0	0	0.5	0	0	0	0	0	0	0	0	0	0	0	0	0	0.5	0	1.2	0
OTU_10889	AGCCGCGGTAATTCCAGCTCCAATAGCGTATATTAAAGTTGTTGCGGTTAAAAAGCTCGTACTTTGACCTCTGCTCAGGTAGACTGGTCCGCCCTCTGGGTGAGCATCTGGCTTGGCCTGGGCATTTTCTTGGTGATCGCAGCTGCCCTTGACTGTGTGGTGCGGAATTCAGGACATTTACTTTGAGGAAATCAGAGTGTTTCAAGCAGGCATCTGCCTTGAATA	99.6	Gonyaulacales	Ceratiaceae	Ceratium	0	0	0	0	0	0.5	0	0	0	0	0	0	0	0	0	0	0	0	0	0.5	0	1.2	0
OTU_10848	AGCCGCGGTAATTCCAGCTCCAATAGCGTATATTAAAGTTGTTGCGGTTAAAAAGCTCGTAGTTGGATTTCTGTCGAAGGAGATCGGTCCGCCCTCTGGGTGAGTATCTGGATCTCTTTGGACATCTTCTTGGGGAACGTATCTGCACTTCATTGTGCGGTGCGGTACTCAAGACTTTTACTTTGAGGAAATTAGAGTGTTTCAAGCAGGCACACGCCTTGAATA	99.6	Peridiniales	Kryptoperidiniaceae	Unruhdinium	0	0	0	0	0	0.5	0	0	0	0.7	0	0.9	0	0	0	0	0	0	0	0	0	0	0
OTU_7650	AGCCGCGGTAATTCCAGCTCCAATAGCGTATATTAAAGTTGTTGCGGTTAAAAAGCTCGTAGTTGGATTTCTGCTGAGGATGACCGGTCCGCCCTCTGGGCAGGTATCTGGTTCAGCTTTGGCATCTTCTTGAAAGGTGTGTCTGCACTTGACTGTGTGGTGCAATATTCAAGACATTTACTTTGAGGAAATTAGAGTGTTTCAAGCAAGCGACTGCTTTGAATA	97.3	Suessiales	Suessiaceae	Asulcocephalium	0	0	2.1	0	0	0	0	0	0	0	0	0	0	0	0	0	0	0	0	0	0	0	0
OTU_9313	AGCCGCGGTAATTCCAGCTCCAATAGCGTATATTAAAGTTGTTGCGGTTAAAAAGCTCGTAGTTGGATTTCTGTCGAAGGAGACCGGTCCGCCCTCTGGGTGAGTATCTGGATCGCTTTGGACATCTTCTTGGGGAACGTATCTGCACTTCATTGTGCGGTGCGGTACTCAAGACTTTTACTTTGAGGAAATTAGAGTGTTTCAAGCAGGCACACGCCTTGAATA	99.6	Peridiniales	Kryptoperidiniaceae	Unruhdinium	0	0	0	0	0	0	0	0	0	1.5	0	0	0.5	0	0	0	0	0	0	0	0	0	0
OTU_9335	AGCCGCGGTAATTCCAGCTCCAATAGCGTATATTAAAGTTGTTGCGGTTAAAAAGCTCGTAGTTGGATTTCTGTCGAAGGAGACCGGTCCGCCCCCTGGGTGAGTATCTGGATCTCTTTGGACATCTTCTTGGGGAACGTATCTGCACTTCATTGTGCGGTGCGGTACTCAAGACTTTTACTTTGAGGAAATTAGAGTGTTTCAAGCAGGCACACGCCTTGAATA	99.6	Peridiniales	Kryptoperidiniaceae	Unruhdinium	0	0	0	0	0	0	0	0	0	1.5	0	0	0.5	0	0	0	0	0	0	0	0	0	0
OTU_18270	AGCCGCGGTAATTCCAGCTCCAATAGCGTATATTAAAGTTGTTGCGGTTAAAAAGCTCGTAGTTTGACCTCTGCTCAGGTAGACTGGTCCGCCCTCTGGGTGAGCATCTGGCTTGGCCTGGGCATTTTCTTGGTGATCGCTGCTGCCCTTGACTGTGTGGTGCGGAATTCAGGACATTTACTTTGAGGAAATCAGAGTGTTTCAAGCAGGCATCTGCCTTGAATA	99.6	Gonyaulacales	Ceratiaceae	Ceratium	0	0	0.5	0	0	0	0	0	0	0	0	0	0	0	0	0	0.2	0	0	0	0	1.2	0
OTU_10495	AGCCGCGGTAATTCCAGCTCCAATAGCGTATATTAAAGTTGTCGCGGTTAAAAAGCTCGTAGTTGGATTTCTGTCGAAGGAGACCGGTCCGCCCTCTGGGTGAGTATCTGGATCTCTTTGGACATCTTCTTGGGGAACGTATCTGCACTTCATTGTGCGGTGCGGTACTCAAGACTTTTACTTTGAGGAAATTAGAGTGTTTCAAGCAGGCACACGCCTTGAATA	99.6	Peridiniales	Kryptoperidiniaceae	Unruhdinium	0	0	0	0	0	0	0	0	0	1.5	0	0	0	0	0	0	0	0	0	0.5	0	0	0
OTU_9715	AGCCGCGGTAATTCCAGCTCCAATAGCGTATATTAAAGTTGTTGCGGTTAAAAAGCTCGTAGTTTGACCTCTGCTTAGGTAGACTGGTCCGCCCTCTGGGTGAGCATCTGGCTTGGCCTGGGCATTTTCTTGGTGATCGCAGCTGCCCTTGACTGTGTGGTGCGGAATTCAGGACATTTACTTTGAGAAAATCAGAGTGTTTCAAGCAGGCATCTGCCTTGAATA	99.1	Gonyaulacales	Ceratiaceae	Ceratium	0	0	0	0	0	0	0	0	0	0	0	0	0	0	0.7	0	0	0	0	0	0	1.2	0
OTU_10623	AGCCGCGGTAATTCCAGCTCCAATAGCGTATATTAAAGTTGTTGCGGTTAAAAAGCTCGTAGTTTGACCTCTGCTCAGGTAGACTGGTCCGCCCTCTAGGTGAGCATCTGGCTTGGCCTGGGCATTTTCTTGGTGATCGCAGCTGCCCTTGACTGTGTGGTGCGGAATTCAGGACATTTACTTTGAGGAAATCAGAGTGTTTCAAGCAGGCATCTGCCTTGAATA	99.6	Gonyaulacales	Ceratiaceae	Ceratium	0	0	0	0	0	0	0	0	0	0	0	0	0	0	0	0.5	0.2	0	0	0	0	1.2	0
OTU_11211	AGCCGCGGTAATTCCAGCTCCAATAGCGTATATTAAAGTTGTTGCGGTTAAAAAGCTCGTAGTTGGATTTCTGTCGAAGGAGACCGGTCCGCCCTCTGGGTGAGTATCTGGATCTCTTTGGACATCTTCTTGGGGAACGTATCTGCACTCCATTGTGCGGTGCGGTACTCAAGACTTTTACTTTGAGGAAATTAGAGTGTTTCAAGCAGGCACACGCCTTGAATA	99.6	Peridiniales	Kryptoperidiniaceae	Unruhdinium	0	0	0	0	0	0	0	0	0	1.5	0	0	0	0	0	0	0.2	0	0	0	0	0	0
OTU_9867	AGCCGCGGTAATTCCAGCTCCAATAGCGTATATTAAAGTTGTTGCGGTTAAAAAGCTCGTAGTTGGATTTCTGTCGAAGGAGACCGGTCCGCCCTCTGGGTGAGTATCTGGATCTCTTTGGACATCTTCTTGGGGAACGTATCTGCACTTCATTGTGCGGTGCGGTACTCAAGACTTTTACTTTGAGAAAATTAGAGTGCTTAAAGCAGGCCATACGCCTGAATA	97.8	Peridiniales	Kryptoperidiniaceae	Unruhdinium	0	0	0	0	0	0	0	0	0	0.7	0	0	0	0	0	0.5	0	0	0	0.5	0	0	0
OTU_10948	AGCCGCGGTAATTCCAGCTCCAATAGCGTATATTAAAGTTGTTGCGGTTAAAAAGCTCGTAGTTTGACCTCTGCTCAGGTAGACTGGTCCGCCCTCTGGGTGAGCATCTGGCTTGGCCCGGGCATTTTCTTGGTGATCGCAGCTGCCCTTGACTGTGTGGTGCGGAATTCAGGACATTTACTTTGAGGAAATCAGAGTGTTTCAAGCAGGCATCTGCCTTGAATA	99.6	Gonyaulacales	Ceratiaceae	Ceratium	0	0	0	0	0	0.5	0	0	0	0	0	0	0	0	0	0	0	0	0	0	0	1.2	0
OTU_11056	AGCCGCGGTAATTCCAGCTCCAATAGCGTATATTAAAGTTGTTGCGGTTAAAAAGCTCGTAGTTGGATTTCTGCTGGGGACGACCGGTCCGCCCTCTGGGTGAGTATCTGGATCTGCCTTGGCATCTCCTTGGGGAACGTAGCTGCACTTGACTGTGTGGTGCGGAATCCAGGGCATTTACTTTGAGAAAATTAGAGTGTTTCAAGCAGGCACATGCCTTGAATA	99.6	Dinophyceae_X	Dinophyceae_XX	Dinophyceae_XXX	0	0	1.6	0	0	0	0	0	0	0	0	0	0	0	0	0	0	0	0	0	0	0	0
OTU_11099	AGCCGCGGTAATTCCAGCTCCAATAGCGTATATTAAAGTTGTTGCGGTTAAAAAGCTCGTAGTTGGATTTCTGCCGAGGACGACCGACCGGCCCATACGGGCTTGCGTCTGGTTAGACCGAGGCATCCTCTTGGAAGACGTGCTGTACTTAATTGTACTCACGGAGTCCAGGACTTTTACTTTGAGGAAATTAGAGTGTTTCAAACAGGCTTTCGCCGTGAATAC	96.9	Prorocentrales	Prorocentraceae	Prorocentrum	0	0	1.6	0	0	0	0	0	0	0	0	0	0	0	0	0	0	0	0	0	0	0	0
OTU_11134	AGCCGCGGTAATTCCAGCTCCAGTAGCGTATATTAAAGTTGTTGCGGTTAAAAAGCTCGTAGTTGGATTTCTGCTGAGGACGACCGACCGGCCCAAACGGGTTTGCGTCTGGTTTGACCGAGGCATCCTCTTGGAAGACGTGCGGTGCTTCAGTGTGCACACGGAGTCCAGGACTTTTACTTTGAGGAAATTAGAGTGTTTCAAACAGGCTTTTGCCGTGAATAC	95.1	Prorocentrales	Prorocentraceae	Prorocentrum	0	0	1.6	0	0	0	0	0	0	0	0	0	0	0	0	0	0	0	0	0	0	0	0
OTU_11140	AGCCGCGGTAATTCCAGCTCCAATAGCGTATATTAAAGTTGTTGCGGTTAAAAAGCTCGTAGTTGGATTTCTGCCGAGGACGACCGACCGACCCATACGGGTTTGTGTCTGGTTAGACCGAGGCATCCTCTTGGAAGACATATCCACTTAACTGTGGTTATGGAGTCCAGGACTTTTACTTTGAGGAAATTAGAGTGTTTCAAACAGGCGTCCGCCGTGAATACA	96.4	Prorocentrales	Prorocentraceae	Prorocentrum	0	0	1.6	0	0	0	0	0	0	0	0	0	0	0	0	0	0	0	0	0	0	0	0
OTU_9652	AGCCGCGGTAATTCCAGCTCCAATAGCGTATATTAAAGTTGTTGCGGTTAAAAAGCTCGTAGTTTAACCTCTGCTCAGGTAGACTGGTCCGCCCTCTGGGTGAGCATCTGGCTTGGCCTGGGCATTTTCTTGGTGATCGCAGCTGCCCTTGACTGTGTGGTGCGGAATTCAGGACATTTACTTTGAGGAAATCAGAGTGTTTCAAGCAGGCATCTGCCTTGAATA	99.6	Gonyaulacales	Ceratiaceae	Ceratium	0	0	0	0	0	0	0	0	0	0	0	0	0	0	0.4	0	0.2	0	0	0	0	0	1
OTU_9132	AGCCGCGGTAATTCCAGCTCCAATAGCGTATATTAAAGTTGTTGCGGTTAAAAAGCTCGTAGTTGGATTTCTGCATAGGATGACTGGTCCGCCCTCTGGGTGAGTATCTGGGTCAGCCTCTGCATCTTCGCGGAGAACGCAGCTGCACTTGATTGTGTGGTGCGGTATCTGTGACTTTTACTTTGAGGAAATTAGAGTGTTTCAAGCAGGTACGTGCCTGAATAC	98.2	Dinophyceae_X	Tovelliaceae	Tovellia	0	0	0	0	0	0	0.5	0	0	0	0	0	0	0	0	0.5	0	0	0	0.5	0	0	0
OTU_6914	AGCCGCGGTAATTCCAGCTCCAATAGCGTATATTAAAGTTGTTGCGGTTAAAAAGCTCGTAGTTGGATTTCTGCTGAGGACGACCGGTCCGCCCTCTGGGTGAGTATCTGGCTTGGCCTCGGCATCTTCTTGGGAAGCGTTGCTGCACTTGACTGTGTGGCGCGATGCCCAGGACCTTTACTTTGAGGAAATTAGAGTGTTTTAAGCAGGCTTGCGCCTTGAATA	95.1	Peridiniales	Diplopsalidaceae	Diplopsalis	0	0	0	0	0	0	0	0	0	0	0	0	0	0	1.4	0	0	0	0	0	0	0	0
OTU_10635	AGCCGCGGTAATTCCAGCTCCAATAGCGTATATTAAAGTTGTTGCGGTTAAAAAGCTCGTAGTTGGATTTCTGCATAGGATGACTGGTCCGCCCTCTGGGTGAGTATCTGGGTCGGCCTGTGCATCTTCGTGGAGAACGCAGCTGCACTTGATTGTGTGGTGCGGCATCTGCGACCTTTACTTTGAGGAAATTAGAGTGTTTCAAGCAGGTATTCGCCTGAATAC	96.9	Dinophyceae_X	Tovelliaceae	Woloszynskia	0	0	0	0	0	0	0	0	0	0	0	0	0	0	0	0	0	0	0	1.4	0	0	0
OTU_10373	AGCCGCGGTAATTCCAGCTCCAATAGCGTATATTAAAGTTGTTGCGGTTAAAAAGCTCGTAGTTGGATTTCTGCCGAGGACGACCGACCGACCCATACGGGTTTGCGTCTGGTTAGACCGAGGCATCCTCTTGGAAGACATGTGGTACTTCACTGTACCCATGGAGTCCAGGACTTTTACTTTGAGGAAATTAGAGTGTTTCAAACAGGCGTTCGCCGTGAATAC	95.1	Prorocentrales	Prorocentraceae	Prorocentrum	0	0	0.5	0	0	0	0	0	0	0	0	0	0	0	0.4	0	0	0	0	0.5	0	0	0
OTU_9855	AGCCGCGGTAATTCCAGCTCCAATAGCGTATATTAAAGTTGTTGCGGTTAAAAAGCTCGTAGTTTGACCTCTGCTCAGGTAGACTGGTCCGCCCTCTGGGTGAGCATCTGGCTTGGCCTGGGCATTTTCTTGGTGATCGCAGCTGCCCTTGACTGTGTGGTGCGGAATTCAGGACATTTACTTTGAGGAAAACAGAGTGTTTCAAGCAGGCATCTGCCTTGAATA	99.6	Gonyaulacales	Ceratiaceae	Ceratium	0	0	0	0	0	0	0	0	0	0	0	0	0	0.5	0	0.5	0.2	0	0	0	0	0	0
OTU_10838	AGCCGCGGTAATTCCAGCTCCAATAGCGTATATTAAAGTTGTTGCGGTTAAAAAGCTCGTAGTTTGACCTCTGCTCAGGTAGACTGGTCCGCCCTCTGGGTGAGCATCTGGCTTGGCCTGGGCATTTTCTTGGTGATCGCAGCTGCCCTTGACTGTGTGGTGCGGAATTCAGGACATTTACTTTGAGGAAATCAGAGTGTCTCAAGCAGGCATCTGCCTTGAATA	99.6	Gonyaulacales	Ceratiaceae	Ceratium	0	0	0	0	0	0.5	0	0	0	0	0	0	0	0	0	0	0.2	0	0	0.5	0	0	0
OTU_7146	AGCCGCGGTAATTCCAGCTCCAATAGCGTATATTAAAGTTGTTGCGGTTAAAAAGCTCGTAGTTGGGTTTCTGCTGAGGACGACCGGTCCGCCCTCTGGGTGAGTATCTGGCTCGGCCTGGGCATCTTCTTGGAGAACGTAGCTGCACTTGAATGTGTGGTGCGGTATCCAGGACTTTTACTTTGAGGAAATTAGAGTGTTTCAAGCAGGCACACGCCTTGAATA	99.6	Peridiniales	Thoracosphaeraceae	Naiadinium	0	0	0	0	0	0	0	0	0	0	0	0	0	0	0	0	0.9	0	0	0	0	0	0
Note: similarity indicate the percentage of similarity of each OTU to a reference

## Sheet: Tables S3
Table S3 Results of the similarity percentage (SIMPER) analysis and the analysis of similarity (ANOSIM) of variance among groups (I, II, III) along Songhua River
Group I VS Group II	OTUs	Oder	Family	Genus	Average Abundance	Average Abundance	Average dissimilarity	Contribution %	Cumulitive Contribution %
					group I	group II
Average dissimilarity:83.04 R = -0.033, p = 0.67	OTU_6	Gonyaulacales	Ceratiaceae	Ceratium	397.7	118.3	23.76	28.61	28.61
	OTU_7	Peridiniales	Kryptoperidiniaceae	Unruhdinium	82.71	14.26	8.01	9.65	38.25
	OTU_115	Peridiniales	Thoracosphaeraceae	Thoracosphaeraceae_X	2.83	80.77	5.79	6.97	45.22
	OTU_146	Peridiniales	Peridiniopsidaceae	Parvodinium	3.72	52.65	3.68	4.44	49.66
	OTU_228	Prorocentrales	Prorocentraceae	Prorocentrum	7.92	0	2.97	3.58	53.24
	OTU_176	Gonyaulacales	Ceratiaceae	Ceratium	25.88	0.12	2.53	3.05	56.29
	OTU_213	Gymnodiniales	Gymnodiniaceae	Nusuttodinium	17.37	0.69	2.12	2.56	58.85
	OTU_328	Peridiniales	Kryptoperidiniaceae	Durinskia	0.59	20.03	1.5	1.81	60.65
	OTU_311	Peridiniales	Peridiniopsidaceae	Parvodinium	3.76	7.17	1.23	1.48	62.14
	OTU_1053	Peridiniales	Thoracosphaeraceae	Apocalathium	2.23	0	1.21	1.46	63.6
	OTU_319	Peridiniales	Diplopsalidaceae	Diplopsalis	1.42	0.34	0.95	1.14	64.74
	OTU_721	Dinophyceae_X	Dinophyceae_XX	Dinophyceae_XXX	1.6	1.36	0.95	1.14	65.88
	OTU_210	Prorocentrales	Prorocentraceae	Prorocentrum	2.75	0.34	0.81	0.97	66.85
	OTU_466	Gonyaulacales	Ceratiaceae	Ceratium	6.68	0.45	0.76	0.91	67.76
	OTU_1957	Dinophyceae_X	Dinophyceae_XX	Dinophyceae_XXX	0.14	1.09	0.68	0.82	68.58
	OTU_421	Prorocentrales	Prorocentraceae	Prorocentrum	2.21	0	0.62	0.75	69.33
	OTU_496	Peridiniales	Thoracosphaeraceae	Naiadinium	1.3	0.41	0.56	0.68	70.01
	OTU_569	Gonyaulacales	Ceratiaceae	Ceratium	5.29	0	0.51	0.62	70.63
	OTU_375	Peridiniales	Peridiniaceae	Peridinium	3.79	1.91	0.45	0.55	71.17
	OTU_508	Gonyaulacales	Ceratiaceae	Ceratium	3.43	0.56	0.44	0.53	71.7
	OTU_895	Peridiniales	Kryptoperidiniaceae	Unruhdinium	1.35	2.55	0.42	0.51	72.21
	OTU_424	Dinophyceae_X	Dinophyceae_XX	Dinophyceae_XXX	1.14	1.5	0.42	0.5	72.71
	OTU_669	Dinophyceae_X	Tovelliaceae	Woloszynskia	1.2	2.55	0.39	0.47	73.18
	OTU_2089	Peridiniales	Thoracosphaeraceae	Thoracosphaeraceae_X	0.8	0	0.38	0.46	73.65
	OTU_619	Dinophyceae_X	Dinophyceae_XX	Dinophyceae_XXX	2.31	0	0.37	0.45	74.1
	OTU_447	Dino-Group-I	Dino-Group-I-Clade-4	Dino-Group-I-Clade-4_X	2.82	1.03	0.37	0.44	74.54
	OTU_832	Dinophyceae_X	Dinophyceae_XX	Dinophyceae_XXX	0.61	0.34	0.34	0.41	74.95
	OTU_464	Gonyaulacales	Ceratiaceae	Ceratium	4.05	0.23	0.32	0.38	75.33
	OTU_903	Prorocentrales	Prorocentraceae	Prorocentrum	1.03	0	0.3	0.36	75.69
	OTU_448	Dino-Group-I	Dino-Group-I-Clade-4	Dino-Group-I-Clade-4_X	2.48	1.83	0.3	0.36	76.05
	OTU_482	Gonyaulacales	Ceratiaceae	Ceratium	3.21	1.71	0.29	0.34	76.39
	OTU_820	Dinophyceae_X	Dinophyceae_XX	Dinophyceae_XXX	1.66	1.61	0.26	0.31	76.7
	OTU_3287	Gymnodiniales	Gymnodiniaceae	Gymnodinium	0.48	0	0.25	0.31	77.01
	OTU_823	Prorocentrales	Prorocentraceae	Prorocentrum	1	0	0.25	0.3	77.3
	OTU_6003	Dinophyceae_X	Dinophyceae_XX	Dinophyceae_XXX	0.43	0	0.23	0.28	77.59
	OTU_460	Gonyaulacales	Ceratiaceae	Ceratium	4.21	0.23	0.23	0.28	77.87
	OTU_2288	Dinophyceae_X	Dinophyceae_XX	Dinophyceae_XXX	0	3.45	0.23	0.27	78.14
	OTU_5831	Dinophyceae_X	Dinophyceae_XX	Dinophyceae_XXX	0.47	0	0.22	0.26	78.41
	OTU_1243	Gonyaulacales	Ceratiaceae	Ceratium	0.96	0.68	0.22	0.26	78.67
	OTU_3318	Gonyaulacales	Ceratiaceae	Ceratium	0.51	0	0.21	0.25	78.92
	OTU_3123	Suessiales	Suessiaceae	Asulcocephalium	0	0.81	0.21	0.25	79.17
	OTU_2641	Peridiniales	Thoracosphaeraceae	Thoracosphaeraceae_X	0	3.1	0.2	0.25	79.42
	OTU_3190	Prorocentrales	Prorocentraceae	Prorocentrum	0.59	0.34	0.2	0.25	79.66
	OTU_1171	Gonyaulacales	Ceratiaceae	Ceratium	0.47	1.25	0.2	0.24	79.9
	OTU_715	Dinophyceae_X	Tovelliaceae	Tovellia	0.58	1.02	0.19	0.23	80.13
	OTU_625	Gonyaulacales	Ceratiaceae	Ceratium	2.35	1.27	0.19	0.22	80.35
	OTU_1319	Gonyaulacales	Ceratiaceae	Ceratium	1.11	1.14	0.18	0.22	80.57
	OTU_872	Dinophyceae_X	Tovelliaceae	Woloszynskia	0.17	2.41	0.18	0.22	80.78
	OTU_3202	Peridiniales	Kryptoperidiniaceae	Unruhdinium	0.49	0	0.17	0.21	80.99
	OTU_1950	Gonyaulacales	Ceratiaceae	Ceratium	0.96	0.45	0.17	0.2	81.2
	OTU_8961	Dinophyceae_X	Tovelliaceae	Woloszynskia	0.21	0.14	0.16	0.19	81.39
	OTU_2347	Gonyaulacales	Ceratiaceae	Ceratium	0.6	0.56	0.16	0.19	81.58
	OTU_1538	Gonyaulacales	Ceratiaceae	Ceratium	0.93	0.79	0.15	0.18	81.76
	OTU_2990	Gonyaulacales	Ceratiaceae	Ceratium	0.25	0.56	0.15	0.18	81.94
	OTU_1278	Gonyaulacales	Ceratiaceae	Ceratium	1.47	0.45	0.15	0.18	82.12
	OTU_491	Peridiniales	Kryptoperidiniaceae	Unruhdinium	0.62	0.35	0.15	0.18	82.3
	OTU_1845	Gonyaulacales	Ceratiaceae	Ceratium	1.4	0	0.14	0.17	82.47
	OTU_1949	Dinophyceae_X	Dinophyceae_XX	Dinophyceae_XXX	0.17	1.49	0.13	0.16	82.63
	OTU_1158	Gonyaulacales	Ceratiaceae	Ceratium	1.01	0.68	0.13	0.15	82.79
	OTU_1746	Gonyaulacales	Ceratiaceae	Ceratium	0.91	0.68	0.13	0.15	82.94
	OTU_8802	Peridiniales	Kryptoperidiniaceae	Unruhdinium	0.36	0	0.13	0.15	83.09
	OTU_4097	Peridiniales	Kryptoperidiniaceae	Unruhdinium	0.43	0.14	0.12	0.15	83.24
	OTU_1484	Gonyaulacales	Ceratiaceae	Ceratium	1.3	0	0.12	0.14	83.38
	OTU_1318	Gonyaulacales	Ceratiaceae	Ceratium	1.39	0.33	0.12	0.14	83.52
	OTU_2650	Gonyaulacales	Ceratiaceae	Ceratium	1.22	0	0.12	0.14	83.67
	OTU_2416	Gonyaulacales	Ceratiaceae	Ceratium	0.51	0.23	0.11	0.14	83.8
	OTU_2322	Gonyaulacales	Ceratiaceae	Ceratium	0.82	0.33	0.11	0.14	83.94
	OTU_3075	Peridiniales	Thoracosphaeraceae	Thoracosphaeraceae_X	0	1.72	0.11	0.14	84.08
	OTU_10629	Gonyaulacales	Ceratiaceae	Ceratium	0.1	0.68	0.11	0.14	84.21
	OTU_8772	Peridiniales	Kryptoperidiniaceae	Unruhdinium	0.25	0.14	0.11	0.13	84.35
	OTU_2306	Gonyaulacales	Ceratiaceae	Ceratium	0.79	0.33	0.11	0.13	84.48
	OTU_4098	Dinophyceae_X	Tovelliaceae	Tovellia	0	0.48	0.11	0.13	84.61
	OTU_8316	Prorocentrales	Prorocentraceae	Prorocentrum	0.17	0	0.11	0.13	84.74
	OTU_3715	Gonyaulacales	Ceratiaceae	Ceratium	0.58	0.33	0.11	0.13	84.86
	OTU_3114	Gonyaulacales	Ceratiaceae	Ceratium	0.48	0.35	0.1	0.13	84.99
	OTU_3727	Gonyaulacales	Ceratiaceae	Ceratium	0.48	0.33	0.1	0.12	85.11
	OTU_2058	Gonyaulacales	Ceratiaceae	Ceratium	0.82	1.03	0.1	0.12	85.24
	OTU_993	Gonyaulacales	Ceratiaceae	Ceratium	0.4	0.12	0.1	0.12	85.36
	OTU_1783	Prorocentrales	Prorocentraceae	Prorocentrum	0.36	0	0.1	0.12	85.48
	OTU_3096	Gonyaulacales	Ceratiaceae	Ceratium	0.57	0.33	0.1	0.12	85.6
	OTU_4611	Prorocentrales	Prorocentraceae	Prorocentrum	0.28	0	0.1	0.12	85.72
	OTU_4503	Gonyaulacales	Ceratiaceae	Ceratium	0.25	0.33	0.1	0.12	85.84
	OTU_4500	Gonyaulacales	Ceratiaceae	Ceratium	0.4	0.33	0.1	0.12	85.95
	OTU_3070	Gonyaulacales	Ceratiaceae	Ceratium	0.44	0.46	0.1	0.12	86.07
	OTU_5124	Peridiniales	Kryptoperidiniaceae	Unruhdinium	0.19	0.14	0.1	0.12	86.18
	OTU_5756	Gonyaulacales	Ceratiaceae	Ceratium	0.26	0.33	0.09	0.11	86.3
	OTU_2518	Gonyaulacales	Ceratiaceae	Ceratium	0.6	0.14	0.09	0.11	86.41
	OTU_2130	Gonyaulacales	Ceratiaceae	Ceratium	0.7	0.34	0.09	0.11	86.52
	OTU_5432	Gonyaulacales	Ceratiaceae	Ceratium	0.2	0.33	0.09	0.11	86.63
	OTU_1335	Suessiales	Suessiaceae	Asulcocephalium	0.45	0.34	0.09	0.11	86.74
	OTU_5151	Peridiniales	Thoracosphaeraceae	Scrippsiella	0	1.38	0.09	0.11	86.85
	OTU_1457	Prorocentrales	Prorocentraceae	Prorocentrum	0.35	0	0.09	0.1	86.96
	OTU_9132	Dinophyceae_X	Tovelliaceae	Tovellia	0	0.14	0.08	0.1	87.06
	OTU_1217	Gonyaulacales	Ceratiaceae	Ceratium	0.99	0.46	0.08	0.1	87.16
	OTU_1491	Gonyaulacales	Ceratiaceae	Ceratium	1.07	0.46	0.08	0.1	87.26
	OTU_1320	Gonyaulacales	Ceratiaceae	Ceratium	1.05	0.23	0.08	0.1	87.35
	OTU_2341	Suessiales	Suessiaceae	Biecheleria	0.48	0.23	0.08	0.1	87.45
	OTU_5874	Dinophyceae_X	Dinophyceae_XX	Dinophyceae_XXX	0.22	0	0.08	0.1	87.55
	OTU_1417	Gonyaulacales	Ceratiaceae	Ceratium	1.19	0.46	0.08	0.09	87.64
	OTU_3911	Gonyaulacales	Ceratiaceae	Ceratium	0.44	0	0.08	0.09	87.73
	OTU_3293	Peridiniales	Thoracosphaeraceae	Naiadinium	0.34	0	0.08	0.09	87.83
	OTU_8422	Gonyaulacales	Ceratiaceae	Ceratium	0.34	0	0.08	0.09	87.92
	OTU_1822	Peridiniales	Kryptoperidiniaceae	Unruhdinium	0.5	0.69	0.08	0.09	88.01
	OTU_2318	Gonyaulacales	Ceratiaceae	Ceratium	0.75	0.23	0.08	0.09	88.1
	OTU_6157	Gonyaulacales	Ceratiaceae	Ceratium	0.24	0	0.07	0.09	88.19
	OTU_5498	Gonyaulacales	Ceratiaceae	Ceratium	0.54	0.34	0.07	0.09	88.28
	OTU_1905	Gonyaulacales	Ceratiaceae	Ceratium	0.97	0	0.07	0.09	88.36
	OTU_3824	Peridiniales	Kryptoperidiniaceae	Unruhdinium	0.31	0.46	0.07	0.08	88.45
	OTU_1149	Gonyaulacales	Ceratiaceae	Ceratium	1.19	0.34	0.07	0.08	88.53
	OTU_1022	Gonyaulacales	Ceratiaceae	Ceratium	1.97	0	0.07	0.08	88.62
	OTU_4436	Gonyaulacales	Ceratiaceae	Ceratium	0.35	0.23	0.07	0.08	88.7
	OTU_2636	Gonyaulacales	Ceratiaceae	Ceratium	0.6	0.23	0.07	0.08	88.78
	OTU_7263	Peridiniales	Thoracosphaeraceae	Thoracosphaeraceae_X	0	1.03	0.07	0.08	88.86
	OTU_10316	Peridiniales	Peridiniopsidaceae	Parvodinium	0	1.03	0.07	0.08	88.95
	OTU_2642	Gonyaulacales	Ceratiaceae	Ceratium	0.76	0.12	0.07	0.08	89.03
	OTU_1680	Gonyaulacales	Ceratiaceae	Ceratium	0.72	0.34	0.07	0.08	89.11
	OTU_4428	Gonyaulacales	Ceratiaceae	Ceratium	0.36	0.23	0.07	0.08	89.19
	OTU_1358	Gonyaulacales	Ceratiaceae	Ceratium	0.93	0.12	0.07	0.08	89.26
	OTU_4491	Gonyaulacales	Ceratiaceae	Ceratium	0.44	0.46	0.06	0.08	89.34
	OTU_2472	Gonyaulacales	Ceratiaceae	Ceratium	0.67	0.12	0.06	0.08	89.42
	OTU_6181	Gonyaulacales	Ceratiaceae	Ceratium	0.46	0	0.06	0.08	89.49
	OTU_5590	Gonyaulacales	Ceratiaceae	Ceratium	0.3	0.23	0.06	0.08	89.57
	OTU_8008	Peridiniales	Thoracosphaeraceae	Thoracosphaeraceae_X	0.06	0.69	0.06	0.08	89.65
	OTU_8544	Gymnodiniales	Gymnodiniaceae	Gyrodiniellum	0.22	0	0.06	0.08	89.72
	OTU_4453	Gonyaulacales	Ceratiaceae	Ceratium	0.34	0.46	0.06	0.08	89.8
	OTU_2310	Gonyaulacales	Ceratiaceae	Ceratium	0.53	0.34	0.06	0.07	89.87
	OTU_6182	Gonyaulacales	Ceratiaceae	Ceratium	0.36	0	0.06	0.07	89.95
	OTU_6224	Gonyaulacales	Ceratiaceae	Ceratium	0.36	0	0.06	0.07	90.02
Group I VS Group III	OTUs	Oder	Family	Genus	Average Abundance	Average Abundance	Average dissimilarity	Contribution %	Cumulitive Contribution %
					group I	group III
Average dissimilarity: 77.94 R = -0.032, p = 0.60	OTU_6	Gonyaulacales	Ceratiaceae	Ceratium	397.7	81.71	21.22	27.22	27.22
	OTU_7	Peridiniales	Kryptoperidiniaceae	Unruhdinium	82.71	15.06	9.33	11.98	39.2
	OTU_228	Prorocentrales	Prorocentraceae	Prorocentrum	7.92	0	2.77	3.56	42.76
	OTU_176	Gonyaulacales	Ceratiaceae	Ceratium	25.88	0.34	2.76	3.54	46.3
	OTU_213	Gymnodiniales	Gymnodiniaceae	Nusuttodinium	17.37	0.15	2.26	2.9	49.2
	OTU_115	Peridiniales	Thoracosphaeraceae	Thoracosphaeraceae_X	2.83	8.03	1.92	2.46	51.66
	OTU_210	Prorocentrales	Prorocentraceae	Prorocentrum	2.75	8.53	1.92	2.46	54.12
	OTU_146	Peridiniales	Peridiniopsidaceae	Parvodinium	3.72	5.97	1.5	1.92	56.04
	OTU_319	Peridiniales	Diplopsalidaceae	Diplopsalis	1.42	5.52	1.46	1.87	57.91
	OTU_1053	Peridiniales	Thoracosphaeraceae	Apocalathium	2.23	0.13	0.99	1.27	59.18
	OTU_311	Peridiniales	Peridiniopsidaceae	Parvodinium	3.76	0.47	0.83	1.06	60.24
	OTU_466	Gonyaulacales	Ceratiaceae	Ceratium	6.68	0	0.7	0.9	61.13
	OTU_496	Peridiniales	Thoracosphaeraceae	Naiadinium	1.3	1.15	0.68	0.87	62
	OTU_424	Dinophyceae_X	Dinophyceae_XX	Dinophyceae_XXX	1.14	1.87	0.66	0.84	62.85
	OTU_491	Peridiniales	Kryptoperidiniaceae	Unruhdinium	0.62	3.29	0.66	0.84	63.69
	OTU_421	Prorocentrales	Prorocentraceae	Prorocentrum	2.21	0.1	0.64	0.83	64.51
	OTU_569	Gonyaulacales	Ceratiaceae	Ceratium	5.29	0	0.55	0.7	65.22
	OTU_698	Peridiniales	Kryptoperidiniaceae	Unruhdinium	0.04	2.9	0.53	0.68	65.9
	OTU_619	Dinophyceae_X	Dinophyceae_XX	Dinophyceae_XXX	2.31	1.03	0.47	0.6	66.5
	OTU_832	Dinophyceae_X	Dinophyceae_XX	Dinophyceae_XXX	0.61	0.7	0.46	0.6	67.09
	OTU_447	Dino-Group-I	Dino-Group-I-Clade-4	Dino-Group-I-Clade-4_X	2.82	1.63	0.45	0.57	67.67
	OTU_721	Dinophyceae_X	Dinophyceae_XX	Dinophyceae_XXX	1.6	0	0.44	0.57	68.23
	OTU_508	Gonyaulacales	Ceratiaceae	Ceratium	3.43	0.62	0.44	0.56	68.79
	OTU_375	Peridiniales	Peridiniaceae	Peridinium	3.79	1.55	0.42	0.54	69.33
	OTU_951	Peridiniales	Kryptoperidiniaceae	Unruhdinium	0	1.95	0.4	0.51	69.84
	OTU_464	Gonyaulacales	Ceratiaceae	Ceratium	4.05	0.73	0.38	0.49	70.34
	OTU_448	Dino-Group-I	Dino-Group-I-Clade-4	Dino-Group-I-Clade-4_X	2.48	1.29	0.33	0.43	70.76
	OTU_2089	Peridiniales	Thoracosphaeraceae	Thoracosphaeraceae_X	0.8	0	0.33	0.42	71.19
	OTU_328	Peridiniales	Kryptoperidiniaceae	Durinskia	0.59	1.47	0.32	0.41	71.6
	OTU_715	Dinophyceae_X	Tovelliaceae	Tovellia	0.58	1.2	0.32	0.41	72.01
	OTU_903	Prorocentrales	Prorocentraceae	Prorocentrum	1.03	0	0.29	0.37	72.37
	OTU_895	Peridiniales	Kryptoperidiniaceae	Unruhdinium	1.35	0.26	0.28	0.36	72.73
	OTU_1017	Peridiniales	Thoracosphaeraceae	Thoracosphaeraceae_X	0.1	1.14	0.28	0.36	73.09
	OTU_1067	Prorocentrales	Prorocentraceae	Prorocentrum	0.2	1.13	0.28	0.35	73.44
	OTU_993	Gonyaulacales	Ceratiaceae	Ceratium	0.4	0.96	0.27	0.34	73.79
	OTU_669	Dinophyceae_X	Tovelliaceae	Woloszynskia	1.2	0.41	0.27	0.34	74.13
	OTU_1317	Prorocentrales	Prorocentraceae	Prorocentrum	0.2	1.73	0.26	0.34	74.46
	OTU_823	Prorocentrales	Prorocentraceae	Prorocentrum	1	0	0.25	0.32	74.79
	OTU_460	Gonyaulacales	Ceratiaceae	Ceratium	4.21	0.49	0.25	0.32	75.1
	OTU_872	Dinophyceae_X	Tovelliaceae	Woloszynskia	0.17	0.97	0.23	0.3	75.4
	OTU_482	Gonyaulacales	Ceratiaceae	Ceratium	3.21	0.71	0.21	0.27	75.67
	OTU_3202	Peridiniales	Kryptoperidiniaceae	Unruhdinium	0.49	0.32	0.21	0.26	75.93
	OTU_3287	Gymnodiniales	Gymnodiniaceae	Gymnodinium	0.48	0	0.21	0.26	76.2
	OTU_1783	Prorocentrales	Prorocentraceae	Prorocentrum	0.36	0.47	0.2	0.25	76.45
	OTU_3318	Gonyaulacales	Ceratiaceae	Ceratium	0.51	0.07	0.19	0.25	76.7
	OTU_5831	Dinophyceae_X	Dinophyceae_XX	Dinophyceae_XXX	0.47	0	0.19	0.25	76.94
	OTU_820	Dinophyceae_X	Dinophyceae_XX	Dinophyceae_XXX	1.66	0.22	0.19	0.24	77.19
	OTU_6003	Dinophyceae_X	Dinophyceae_XX	Dinophyceae_XXX	0.43	0	0.19	0.24	77.43
	OTU_1243	Gonyaulacales	Ceratiaceae	Ceratium	0.96	0.31	0.19	0.24	77.67
	OTU_2206	Prorocentrales	Prorocentraceae	Prorocentrum	0.14	1.06	0.18	0.23	77.89
	OTU_8316	Prorocentrales	Prorocentraceae	Prorocentrum	0.17	0.42	0.17	0.21	78.11
	OTU_3190	Prorocentrales	Prorocentraceae	Prorocentrum	0.59	0	0.17	0.21	78.32
	OTU_1845	Gonyaulacales	Ceratiaceae	Ceratium	1.4	0.05	0.16	0.21	78.53
	OTU_7766	Prorocentrales	Prorocentraceae	Prorocentrum	0	0.63	0.16	0.2	78.73
	OTU_625	Gonyaulacales	Ceratiaceae	Ceratium	2.35	0.46	0.16	0.2	78.93
	OTU_824	Gonyaulacales	Ceratiaceae	Ceratium	1.81	0.51	0.14	0.18	79.12
	OTU_1457	Prorocentrales	Prorocentraceae	Prorocentrum	0.35	0.26	0.14	0.18	79.3
	OTU_1335	Suessiales	Suessiaceae	Asulcocephalium	0.45	0.47	0.14	0.18	79.48
	OTU_1686	Gonyaulacales	Ceratiaceae	Ceratium	0.7	0.55	0.14	0.18	79.66
	OTU_1484	Gonyaulacales	Ceratiaceae	Ceratium	1.3	0.08	0.13	0.17	79.84
	OTU_1158	Gonyaulacales	Ceratiaceae	Ceratium	1.01	0.45	0.13	0.16	80
	OTU_2650	Gonyaulacales	Ceratiaceae	Ceratium	1.22	0	0.13	0.16	80.16
	OTU_1562	Gonyaulacales	Ceratiaceae	Ceratium	0.85	0.52	0.12	0.16	80.32
	OTU_1149	Gonyaulacales	Ceratiaceae	Ceratium	1.19	0.3	0.11	0.15	80.47
	OTU_1222	Gonyaulacales	Ceratiaceae	Ceratium	1.17	0.26	0.11	0.15	80.61
	OTU_1680	Gonyaulacales	Ceratiaceae	Ceratium	0.72	0.34	0.11	0.14	80.76
	OTU_3293	Peridiniales	Thoracosphaeraceae	Naiadinium	0.34	0.13	0.11	0.14	80.89
	OTU_8802	Peridiniales	Kryptoperidiniaceae	Unruhdinium	0.36	0	0.1	0.13	81.03
	OTU_1320	Gonyaulacales	Ceratiaceae	Ceratium	1.05	0.31	0.1	0.13	81.16
	OTU_3701	Gonyaulacales	Ceratiaceae	Ceratium	0.42	0.33	0.1	0.13	81.29
	OTU_3119	Gonyaulacales	Ceratiaceae	Ceratium	0.66	0.24	0.1	0.13	81.41
	OTU_2130	Gonyaulacales	Ceratiaceae	Ceratium	0.7	0.12	0.1	0.13	81.54
	OTU_4611	Prorocentrales	Prorocentraceae	Prorocentrum	0.28	0	0.09	0.12	81.66
	OTU_4149	Peridiniales	Thoracosphaeraceae	Thoracosphaeraceae_X	0.06	0.38	0.09	0.12	81.78
	OTU_5804	Prorocentrales	Prorocentraceae	Prorocentrum	0	0.59	0.09	0.12	81.9
	OTU_3911	Gonyaulacales	Ceratiaceae	Ceratium	0.44	0.1	0.09	0.12	82.02
	OTU_8961	Dinophyceae_X	Tovelliaceae	Woloszynskia	0.21	0	0.09	0.12	82.14
	OTU_1905	Gonyaulacales	Ceratiaceae	Ceratium	0.97	0.11	0.09	0.12	82.26
	OTU_2416	Gonyaulacales	Ceratiaceae	Ceratium	0.51	0.18	0.09	0.12	82.38
	OTU_2031	Gonyaulacales	Ceratiaceae	Ceratium	0.62	0.25	0.09	0.12	82.5
	OTU_2645	Gonyaulacales	Ceratiaceae	Ceratium	0.59	0.34	0.09	0.12	82.61
	OTU_6157	Gonyaulacales	Ceratiaceae	Ceratium	0.24	0.12	0.09	0.12	82.73
	OTU_4388	Gonyaulacales	Ceratiaceae	Ceratium	0.3	0.35	0.09	0.12	82.85
	OTU_1491	Gonyaulacales	Ceratiaceae	Ceratium	1.07	0.15	0.09	0.11	82.96
	OTU_2028	Gonyaulacales	Ceratiaceae	Ceratium	0.62	0.32	0.09	0.11	83.07
	OTU_1022	Gonyaulacales	Ceratiaceae	Ceratium	1.97	0.07	0.09	0.11	83.19
	OTU_1312	Gonyaulacales	Ceratiaceae	Ceratium	0.96	0.23	0.09	0.11	83.3
	OTU_5160	Gymnodiniales	Gymnodiniaceae	Gyrodinium	0	0.36	0.09	0.11	83.41
	OTU_1217	Gonyaulacales	Ceratiaceae	Ceratium	0.99	0.22	0.09	0.11	83.52
	OTU_1535	Gonyaulacales	Ceratiaceae	Ceratium	0.95	0.33	0.08	0.11	83.63
	OTU_1949	Dinophyceae_X	Dinophyceae_XX	Dinophyceae_XXX	0.17	0.4	0.08	0.11	83.74
	OTU_1171	Gonyaulacales	Ceratiaceae	Ceratium	0.47	0.38	0.08	0.11	83.84
	OTU_2868	Peridiniales	Kryptoperidiniaceae	Unruhdinium	0.37	0.23	0.08	0.11	83.95
	OTU_2644	Gonyaulacales	Ceratiaceae	Ceratium	0.71	0.29	0.08	0.11	84.05
	OTU_1549	Gonyaulacales	Ceratiaceae	Ceratium	1.02	0.25	0.08	0.1	84.16
	OTU_1756	Peridiniales	Kryptoperidiniaceae	Unruhdinium	0.74	0.13	0.08	0.1	84.26
	OTU_2361	Gonyaulacales	Ceratiaceae	Ceratium	0.71	0.28	0.08	0.1	84.36
	OTU_6753	Gonyaulacales	Ceratiaceae	Ceratium	0.14	0.34	0.08	0.1	84.46
	OTU_5774	Gonyaulacales	Ceratiaceae	Ceratium	0.25	0.28	0.08	0.1	84.56
	OTU_1950	Gonyaulacales	Ceratiaceae	Ceratium	0.96	0	0.08	0.1	84.66
	OTU_5874	Dinophyceae_X	Dinophyceae_XX	Dinophyceae_XXX	0.22	0	0.08	0.1	84.75
	OTU_7831	Suessiales	Suessiaceae	Asulcocephalium	0	0.46	0.07	0.1	84.85
	OTU_8422	Gonyaulacales	Ceratiaceae	Ceratium	0.34	0	0.07	0.1	84.94
	OTU_9338	Peridiniales	Kryptoperidiniaceae	Unruhdinium	0.06	0.29	0.07	0.09	85.04
	OTU_3708	Gonyaulacales	Ceratiaceae	Ceratium	0.4	0.26	0.07	0.09	85.13
	OTU_1822	Peridiniales	Kryptoperidiniaceae	Unruhdinium	0.5	0.21	0.07	0.09	85.23
	OTU_7748	Peridiniales	Kryptoperidiniaceae	Unruhdinium	0.15	0.21	0.07	0.09	85.32
	OTU_6793	Peridiniales	Kryptoperidiniaceae	Unruhdinium	0	0.39	0.07	0.09	85.41
	OTU_5763	Gonyaulacales	Ceratiaceae	Ceratium	0.3	0.24	0.07	0.09	85.5
	OTU_7774	Gonyaulacales	Ceratiaceae	Ceratium	0.2	0.26	0.07	0.09	85.59
	OTU_2310	Gonyaulacales	Ceratiaceae	Ceratium	0.53	0.16	0.07	0.09	85.68
	OTU_6182	Gonyaulacales	Ceratiaceae	Ceratium	0.36	0.03	0.07	0.09	85.76
	OTU_5560	Gonyaulacales	Ceratiaceae	Ceratium	0.28	0.21	0.07	0.09	85.85
	OTU_10602	Gonyaulacales	Ceratiaceae	Ceratium	0.1	0.26	0.07	0.09	85.94
	OTU_3070	Gonyaulacales	Ceratiaceae	Ceratium	0.44	0.03	0.07	0.08	86.02
	OTU_1750	Gonyaulacales	Ceratiaceae	Ceratium	0.68	0.16	0.07	0.08	86.11
	OTU_1418	Gonyaulacales	Ceratiaceae	Ceratium	1.33	0.08	0.07	0.08	86.19
	OTU_5642	Peridiniales	Peridiniaceae	Peridinium	0.4	0.13	0.06	0.08	86.27
	OTU_2313	Gonyaulacales	Ceratiaceae	Ceratium	0.6	0.23	0.06	0.08	86.35
	OTU_2341	Suessiales	Suessiaceae	Biecheleria	0.48	0.12	0.06	0.08	86.44
	OTU_1358	Gonyaulacales	Ceratiaceae	Ceratium	0.93	0.07	0.06	0.08	86.52
	OTU_11397	Gymnodiniales	Gymnodiniaceae	Gyrodiniellum	0	0.33	0.06	0.08	86.6
	OTU_2636	Gonyaulacales	Ceratiaceae	Ceratium	0.6	0.21	0.06	0.08	86.68
	OTU_1855	Gonyaulacales	Ceratiaceae	Ceratium	0.86	0.03	0.06	0.08	86.76
	OTU_6181	Gonyaulacales	Ceratiaceae	Ceratium	0.46	0	0.06	0.08	86.83
	OTU_4098	Dinophyceae_X	Tovelliaceae	Tovellia	0	0.27	0.06	0.08	86.91
	OTU_8544	Gymnodiniales	Gymnodiniaceae	Gyrodiniellum	0.22	0	0.06	0.08	86.99
	OTU_4435	Gonyaulacales	Ceratiaceae	Ceratium	0.4	0.21	0.06	0.08	87.06
	OTU_6224	Gonyaulacales	Ceratiaceae	Ceratium	0.36	0	0.06	0.08	87.14
	OTU_10564	Gonyaulacales	Ceratiaceae	Ceratium	0.16	0.21	0.06	0.07	87.21
	OTU_4418	Gonyaulacales	Ceratiaceae	Ceratium	0.46	0.13	0.06	0.07	87.29
	OTU_3677	Gonyaulacales	Ceratiaceae	Ceratium	0.38	0.15	0.06	0.07	87.36
	OTU_5727	Gonyaulacales	Ceratiaceae	Ceratium	0.28	0.12	0.06	0.07	87.43
	OTU_3368	Peridiniales	Kryptoperidiniaceae	Unruhdinium	0.56	0	0.06	0.07	87.51
	OTU_5498	Gonyaulacales	Ceratiaceae	Ceratium	0.54	0	0.06	0.07	87.58
	OTU_7473	Gonyaulacales	Ceratiaceae	Ceratium	0.54	0	0.06	0.07	87.65
	OTU_6914	Peridiniales	Diplopsalidaceae	Diplopsalis	0	0.21	0.06	0.07	87.72
	OTU_3107	Gonyaulacales	Ceratiaceae	Ceratium	0.4	0.24	0.06	0.07	87.79
	OTU_1318	Gonyaulacales	Ceratiaceae	Ceratium	1.39	0.13	0.05	0.07	87.86
	OTU_5747	Dinophyceae_X	Dinophyceae_XX	Dinophyceae_XXX	0.22	0	0.05	0.07	87.93
	OTU_4562	Peridiniales	Kryptoperidiniaceae	Unruhdinium	0.25	0.21	0.05	0.07	88
	OTU_3763	Peridiniales	Kryptoperidiniaceae	Unruhdinium	0.25	0.21	0.05	0.07	88.07
	OTU_3123	Suessiales	Suessiaceae	Asulcocephalium	0	0.21	0.05	0.07	88.14
	OTU_2638	Gonyaulacales	Ceratiaceae	Ceratium	0.64	0.21	0.05	0.07	88.21
	OTU_4963	Peridiniales	Kryptoperidiniaceae	Unruhdinium	0.31	0.07	0.05	0.07	88.27
	OTU_3013	Gonyaulacales	Ceratiaceae	Ceratium	0.63	0.05	0.05	0.07	88.34
	OTU_2307	Gonyaulacales	Ceratiaceae	Ceratium	0.72	0.13	0.05	0.07	88.41
	OTU_3162	Gonyaulacales	Ceratiaceae	Ceratium	0.74	0.05	0.05	0.07	88.48
	OTU_11456	Dinophyceae_X	Dinophyceae_XX	Dinophyceae_XXX	0	0.31	0.05	0.07	88.54
	OTU_1417	Gonyaulacales	Ceratiaceae	Ceratium	1.19	0.08	0.05	0.07	88.61
	OTU_1278	Gonyaulacales	Ceratiaceae	Ceratium	1.47	0	0.05	0.07	88.67
	OTU_1538	Gonyaulacales	Ceratiaceae	Ceratium	0.93	0.03	0.05	0.07	88.74
	OTU_4563	Peridiniales	Kryptoperidiniaceae	Unruhdinium	0.33	0.13	0.05	0.06	88.8
	OTU_7146	Peridiniales	Thoracosphaeraceae	Naiadinium	0	0.13	0.05	0.06	88.87
	OTU_2472	Gonyaulacales	Ceratiaceae	Ceratium	0.67	0	0.05	0.06	88.93
	OTU_4034	Gonyaulacales	Ceratiaceae	Ceratium	0.37	0.07	0.05	0.06	89
	OTU_7481	Dinophyceae_X	Tovelliaceae	Woloszynskia	0.36	0	0.05	0.06	89.06
	OTU_4545	Peridiniales	Kryptoperidiniaceae	Unruhdinium	0.25	0.18	0.05	0.06	89.12
	OTU_2626	Gonyaulacales	Ceratiaceae	Ceratium	0.59	0.12	0.05	0.06	89.19
	OTU_2515	Gonyaulacales	Ceratiaceae	Ceratium	0.61	0.13	0.05	0.06	89.25
	OTU_2039	Gonyaulacales	Ceratiaceae	Ceratium	0.83	0.12	0.05	0.06	89.31
	OTU_4420	Gonyaulacales	Ceratiaceae	Ceratium	0.35	0.12	0.05	0.06	89.37
	OTU_1825	Gonyaulacales	Ceratiaceae	Ceratium	0.85	0.12	0.05	0.06	89.44
	OTU_2312	Gonyaulacales	Ceratiaceae	Ceratium	0.73	0.05	0.05	0.06	89.5
	OTU_3113	Gonyaulacales	Ceratiaceae	Ceratium	0.5	0.14	0.05	0.06	89.56
	OTU_3109	Gonyaulacales	Ceratiaceae	Ceratium	0.6	0.07	0.05	0.06	89.62
	OTU_4097	Peridiniales	Kryptoperidiniaceae	Unruhdinium	0.43	0	0.05	0.06	89.68
	OTU_2058	Gonyaulacales	Ceratiaceae	Ceratium	0.82	0	0.05	0.06	89.74
	OTU_4432	Gonyaulacales	Ceratiaceae	Ceratium	0.24	0.14	0.05	0.06	89.8
	OTU_8805	Dinophyceae_X	Tovelliaceae	Tovellia	0.12	0.2	0.05	0.06	89.86
	OTU_5674	Gonyaulacales	Ceratiaceae	Ceratium	0.13	0.13	0.05	0.06	89.92
	OTU_4046	Peridiniales	Kryptoperidiniaceae	Unruhdinium	0.31	0.08	0.05	0.06	89.98
	OTU_3117	Gonyaulacales	Ceratiaceae	Ceratium	0.62	0.05	0.05	0.06	90.04
Group II VS Group III	OTUs	Oder	Family	Genus	Average Abundance	Average Abundance	Average dissimilarity	Contribution %	Cumulitive Contribution %
					group II	group III
Average dissimilarity: 68.91 R = 0.153, p = 0.17	OTU_6	Gonyaulacales	Ceratiaceae	Ceratium	118.3	81.71	19.38	28.12	28.12
	OTU_115	Peridiniales	Thoracosphaeraceae	Thoracosphaeraceae_X	80.77	8.03	7.73	11.22	39.33
	OTU_146	Peridiniales	Peridiniopsidaceae	Parvodinium	52.65	5.97	5.23	7.59	46.93
	OTU_7	Peridiniales	Kryptoperidiniaceae	Unruhdinium	14.26	15.06	3.62	5.26	52.18
	OTU_328	Peridiniales	Kryptoperidiniaceae	Durinskia	20.03	1.47	1.74	2.53	54.71
	OTU_210	Prorocentrales	Prorocentraceae	Prorocentrum	0.34	8.53	1.52	2.2	56.91
	OTU_319	Peridiniales	Diplopsalidaceae	Diplopsalis	0.34	5.52	1.33	1.94	58.85
	OTU_721	Dinophyceae_X	Dinophyceae_XX	Dinophyceae_XXX	1.36	0	0.75	1.09	59.94
	OTU_491	Peridiniales	Kryptoperidiniaceae	Unruhdinium	0.35	3.29	0.71	1.04	60.98
	OTU_311	Peridiniales	Peridiniopsidaceae	Parvodinium	7.17	0.47	0.68	0.99	61.97
	OTU_424	Dinophyceae_X	Dinophyceae_XX	Dinophyceae_XXX	1.5	1.87	0.67	0.97	62.94
	OTU_1957	Dinophyceae_X	Dinophyceae_XX	Dinophyceae_XXX	1.09	0.08	0.61	0.88	63.82
	OTU_496	Peridiniales	Thoracosphaeraceae	Naiadinium	0.41	1.15	0.59	0.86	64.68
	OTU_698	Peridiniales	Kryptoperidiniaceae	Unruhdinium	0	2.9	0.59	0.85	65.53
	OTU_447	Dino-Group-I	Dino-Group-I-Clade-4	Dino-Group-I-Clade-4_X	1.03	1.63	0.48	0.69	66.23
	OTU_375	Peridiniales	Peridiniaceae	Peridinium	1.91	1.55	0.47	0.68	66.9
	OTU_951	Peridiniales	Kryptoperidiniaceae	Unruhdinium	0	1.95	0.44	0.64	67.54
	OTU_872	Dinophyceae_X	Tovelliaceae	Woloszynskia	2.41	0.97	0.41	0.59	68.14
	OTU_715	Dinophyceae_X	Tovelliaceae	Tovellia	1.02	1.2	0.36	0.52	68.66
	OTU_448	Dino-Group-I	Dino-Group-I-Clade-4	Dino-Group-I-Clade-4_X	1.83	1.29	0.34	0.5	69.16
	OTU_832	Dinophyceae_X	Dinophyceae_XX	Dinophyceae_XXX	0.34	0.7	0.34	0.5	69.65
	OTU_1017	Peridiniales	Thoracosphaeraceae	Thoracosphaeraceae_X	0	1.14	0.31	0.45	70.1
	OTU_669	Dinophyceae_X	Tovelliaceae	Woloszynskia	2.55	0.41	0.3	0.43	70.54
	OTU_1317	Prorocentrales	Prorocentraceae	Prorocentrum	0	1.73	0.28	0.41	70.95
	OTU_482	Gonyaulacales	Ceratiaceae	Ceratium	1.71	0.71	0.28	0.4	71.35
	OTU_1067	Prorocentrales	Prorocentraceae	Prorocentrum	0	1.13	0.27	0.4	71.74
	OTU_3123	Suessiales	Suessiaceae	Asulcocephalium	0.81	0.21	0.26	0.38	72.12
	OTU_993	Gonyaulacales	Ceratiaceae	Ceratium	0.12	0.96	0.26	0.37	72.49
	OTU_2288	Dinophyceae_X	Dinophyceae_XX	Dinophyceae_XXX	3.45	0	0.26	0.37	72.87
	OTU_895	Peridiniales	Kryptoperidiniaceae	Unruhdinium	2.55	0.26	0.25	0.37	73.23
	OTU_2641	Peridiniales	Thoracosphaeraceae	Thoracosphaeraceae_X	3.1	0	0.23	0.33	73.57
	OTU_464	Gonyaulacales	Ceratiaceae	Ceratium	0.23	0.73	0.22	0.33	73.89
	OTU_1171	Gonyaulacales	Ceratiaceae	Ceratium	1.25	0.38	0.22	0.32	74.21
	OTU_7766	Prorocentrales	Prorocentraceae	Prorocentrum	0.12	0.63	0.2	0.29	74.51
	OTU_820	Dinophyceae_X	Dinophyceae_XX	Dinophyceae_XXX	1.61	0.22	0.19	0.28	74.78
	OTU_508	Gonyaulacales	Ceratiaceae	Ceratium	0.56	0.62	0.19	0.28	75.06
	OTU_625	Gonyaulacales	Ceratiaceae	Ceratium	1.27	0.46	0.19	0.28	75.34
	OTU_2206	Prorocentrales	Prorocentraceae	Prorocentrum	0	1.06	0.18	0.27	75.6
	OTU_1319	Gonyaulacales	Ceratiaceae	Ceratium	1.14	0.07	0.18	0.26	75.87
	OTU_619	Dinophyceae_X	Dinophyceae_XX	Dinophyceae_XXX	0	1.03	0.18	0.26	76.13
	OTU_1949	Dinophyceae_X	Dinophyceae_XX	Dinophyceae_XXX	1.49	0.4	0.18	0.26	76.39
	OTU_1158	Gonyaulacales	Ceratiaceae	Ceratium	0.68	0.45	0.17	0.25	76.64
	OTU_3075	Peridiniales	Thoracosphaeraceae	Thoracosphaeraceae_X	1.72	0.18	0.17	0.25	76.88
	OTU_2347	Gonyaulacales	Ceratiaceae	Ceratium	0.56	0.07	0.17	0.24	77.13
	OTU_2990	Gonyaulacales	Ceratiaceae	Ceratium	0.56	0.12	0.17	0.24	77.37
	OTU_1243	Gonyaulacales	Ceratiaceae	Ceratium	0.68	0.31	0.16	0.23	77.6
	OTU_1538	Gonyaulacales	Ceratiaceae	Ceratium	0.79	0.03	0.16	0.23	77.83
	OTU_4098	Dinophyceae_X	Tovelliaceae	Tovellia	0.48	0.27	0.14	0.21	78.04
	OTU_460	Gonyaulacales	Ceratiaceae	Ceratium	0.23	0.49	0.14	0.2	78.24
	OTU_1686	Gonyaulacales	Ceratiaceae	Ceratium	0.12	0.55	0.13	0.19	78.43
	OTU_1783	Prorocentrales	Prorocentraceae	Prorocentrum	0	0.47	0.13	0.19	78.63
	OTU_466	Gonyaulacales	Ceratiaceae	Ceratium	0.45	0	0.13	0.19	78.82
	OTU_1950	Gonyaulacales	Ceratiaceae	Ceratium	0.45	0	0.13	0.19	79.01
	OTU_1278	Gonyaulacales	Ceratiaceae	Ceratium	0.45	0	0.13	0.19	79.21
	OTU_824	Gonyaulacales	Ceratiaceae	Ceratium	0	0.51	0.13	0.19	79.39
	OTU_1335	Suessiales	Suessiaceae	Asulcocephalium	0.34	0.47	0.13	0.19	79.58
	OTU_1562	Gonyaulacales	Ceratiaceae	Ceratium	0.12	0.52	0.13	0.18	79.76
	OTU_10629	Gonyaulacales	Ceratiaceae	Ceratium	0.68	0	0.13	0.18	79.94
	OTU_1746	Gonyaulacales	Ceratiaceae	Ceratium	0.68	0	0.13	0.18	80.13
	OTU_1320	Gonyaulacales	Ceratiaceae	Ceratium	0.23	0.31	0.12	0.18	80.31
	OTU_5151	Peridiniales	Thoracosphaeraceae	Scrippsiella	1.38	0.08	0.12	0.17	80.48
	OTU_8316	Prorocentrales	Prorocentraceae	Prorocentrum	0	0.42	0.12	0.17	80.65
	OTU_4503	Gonyaulacales	Ceratiaceae	Ceratium	0.33	0.16	0.12	0.17	80.82
	OTU_5432	Gonyaulacales	Ceratiaceae	Ceratium	0.33	0.06	0.12	0.17	80.99
	OTU_1318	Gonyaulacales	Ceratiaceae	Ceratium	0.33	0.13	0.11	0.16	81.15
	OTU_3727	Gonyaulacales	Ceratiaceae	Ceratium	0.33	0.07	0.11	0.16	81.31
	OTU_3096	Gonyaulacales	Ceratiaceae	Ceratium	0.33	0.07	0.11	0.16	81.46
	OTU_2306	Gonyaulacales	Ceratiaceae	Ceratium	0.33	0.07	0.11	0.16	81.62
	OTU_176	Gonyaulacales	Ceratiaceae	Ceratium	0.12	0.34	0.11	0.16	81.78
	OTU_5756	Gonyaulacales	Ceratiaceae	Ceratium	0.33	0.05	0.11	0.16	81.93
	OTU_4500	Gonyaulacales	Ceratiaceae	Ceratium	0.33	0.05	0.11	0.16	82.09
	OTU_2636	Gonyaulacales	Ceratiaceae	Ceratium	0.23	0.21	0.11	0.15	82.24
	OTU_1680	Gonyaulacales	Ceratiaceae	Ceratium	0.34	0.34	0.11	0.15	82.4
	OTU_1149	Gonyaulacales	Ceratiaceae	Ceratium	0.34	0.3	0.1	0.15	82.55
	OTU_5804	Prorocentrales	Prorocentraceae	Prorocentrum	0	0.59	0.1	0.15	82.7
	OTU_4149	Peridiniales	Thoracosphaeraceae	Thoracosphaeraceae_X	0	0.38	0.1	0.15	82.84
	OTU_3715	Gonyaulacales	Ceratiaceae	Ceratium	0.33	0	0.1	0.15	82.99
	OTU_2322	Gonyaulacales	Ceratiaceae	Ceratium	0.33	0	0.1	0.15	83.13
	OTU_3114	Gonyaulacales	Ceratiaceae	Ceratium	0.35	0	0.1	0.14	83.28
	OTU_5160	Gymnodiniales	Gymnodiniaceae	Gyrodinium	0	0.36	0.1	0.14	83.42
	OTU_4388	Gonyaulacales	Ceratiaceae	Ceratium	0	0.35	0.1	0.14	83.56
	OTU_213	Gymnodiniales	Gymnodiniaceae	Nusuttodinium	0.69	0.15	0.09	0.14	83.69
	OTU_3202	Peridiniales	Kryptoperidiniaceae	Unruhdinium	0	0.32	0.09	0.14	83.83
	OTU_3701	Gonyaulacales	Ceratiaceae	Ceratium	0	0.33	0.09	0.13	83.96
	OTU_7263	Peridiniales	Thoracosphaeraceae	Thoracosphaeraceae_X	1.03	0.07	0.09	0.13	84.09
	OTU_2361	Gonyaulacales	Ceratiaceae	Ceratium	0.12	0.28	0.09	0.13	84.23
	OTU_3708	Gonyaulacales	Ceratiaceae	Ceratium	0.34	0.26	0.09	0.13	84.36
	OTU_1217	Gonyaulacales	Ceratiaceae	Ceratium	0.46	0.22	0.09	0.13	84.49
	OTU_1222	Gonyaulacales	Ceratiaceae	Ceratium	0	0.26	0.09	0.13	84.62
	OTU_2341	Suessiales	Suessiaceae	Biecheleria	0.23	0.12	0.09	0.13	84.75
	OTU_2518	Gonyaulacales	Ceratiaceae	Ceratium	0.14	0.18	0.09	0.13	84.88
	OTU_1491	Gonyaulacales	Ceratiaceae	Ceratium	0.46	0.15	0.09	0.12	85
	OTU_1822	Peridiniales	Kryptoperidiniaceae	Unruhdinium	0.69	0.21	0.09	0.12	85.13
	OTU_1312	Gonyaulacales	Ceratiaceae	Ceratium	0.34	0.23	0.08	0.12	85.25
	OTU_2416	Gonyaulacales	Ceratiaceae	Ceratium	0.23	0.18	0.08	0.12	85.37
	OTU_2031	Gonyaulacales	Ceratiaceae	Ceratium	0	0.25	0.08	0.12	85.49
	OTU_4435	Gonyaulacales	Ceratiaceae	Ceratium	0.12	0.21	0.08	0.12	85.61
	OTU_7831	Suessiales	Suessiaceae	Asulcocephalium	0	0.46	0.08	0.12	85.73
	OTU_2028	Gonyaulacales	Ceratiaceae	Ceratium	0	0.32	0.08	0.12	85.85
	OTU_7231	Peridiniales	Thoracosphaeraceae	Thoracosphaeraceae_X	0.69	0.13	0.08	0.12	85.97
	OTU_7259	Peridiniales	Thoracosphaeraceae	Thoracosphaeraceae_X	0.69	0.13	0.08	0.12	86.08
	OTU_7256	Peridiniales	Peridiniopsidaceae	Parvodinium	0.69	0.13	0.08	0.12	86.2
	OTU_7264	Dinophyceae_X	Dinophyceae_XX	Dinophyceae_XXX	0.69	0.13	0.08	0.12	86.31
	OTU_7336	Dinophyceae_X	Dinophyceae_XX	Dinophyceae_XXX	0.69	0.13	0.08	0.12	86.43
	OTU_3112	Gonyaulacales	Ceratiaceae	Ceratium	0.46	0.1	0.08	0.12	86.55
	OTU_6753	Gonyaulacales	Ceratiaceae	Ceratium	0	0.34	0.08	0.12	86.66
	OTU_2645	Gonyaulacales	Ceratiaceae	Ceratium	0	0.34	0.08	0.12	86.78
	OTU_9338	Peridiniales	Kryptoperidiniaceae	Unruhdinium	0	0.29	0.08	0.11	86.89
	OTU_2644	Gonyaulacales	Ceratiaceae	Ceratium	0	0.29	0.08	0.11	87.01
	OTU_9132	Dinophyceae_X	Tovelliaceae	Tovellia	0.14	0.14	0.08	0.11	87.12
	OTU_5560	Gonyaulacales	Ceratiaceae	Ceratium	0.34	0.21	0.08	0.11	87.23
	OTU_5124	Peridiniales	Kryptoperidiniaceae	Unruhdinium	0.14	0.05	0.08	0.11	87.34
	OTU_10316	Peridiniales	Peridiniopsidaceae	Parvodinium	1.03	0	0.08	0.11	87.46
	OTU_2058	Gonyaulacales	Ceratiaceae	Ceratium	1.03	0	0.08	0.11	87.57
	OTU_6793	Peridiniales	Kryptoperidiniaceae	Unruhdinium	0	0.39	0.08	0.11	87.68
	OTU_5774	Gonyaulacales	Ceratiaceae	Ceratium	0	0.28	0.08	0.11	87.79
	OTU_4382	Gonyaulacales	Ceratiaceae	Ceratium	0.46	0.2	0.08	0.11	87.9
	OTU_8772	Peridiniales	Kryptoperidiniaceae	Unruhdinium	0.14	0	0.08	0.11	88.01
	OTU_4097	Peridiniales	Kryptoperidiniaceae	Unruhdinium	0.14	0	0.08	0.11	88.12
	OTU_8961	Dinophyceae_X	Tovelliaceae	Woloszynskia	0.14	0	0.08	0.11	88.23
	OTU_1457	Prorocentrales	Prorocentraceae	Prorocentrum	0	0.26	0.07	0.11	88.34
	OTU_10602	Gonyaulacales	Ceratiaceae	Ceratium	0	0.26	0.07	0.11	88.44
	OTU_7774	Gonyaulacales	Ceratiaceae	Ceratium	0	0.26	0.07	0.11	88.55
	OTU_5550	Gonyaulacales	Ceratiaceae	Ceratium	0.23	0.05	0.07	0.11	88.66
	OTU_5763	Gonyaulacales	Ceratiaceae	Ceratium	0	0.24	0.07	0.11	88.77
	OTU_3119	Gonyaulacales	Ceratiaceae	Ceratium	0	0.24	0.07	0.11	88.87
	OTU_4453	Gonyaulacales	Ceratiaceae	Ceratium	0.46	0.07	0.07	0.11	88.98
	OTU_1535	Gonyaulacales	Ceratiaceae	Ceratium	0	0.33	0.07	0.1	89.08
	OTU_1549	Gonyaulacales	Ceratiaceae	Ceratium	0.34	0.25	0.07	0.1	89.18
	OTU_11397	Gymnodiniales	Gymnodiniaceae	Gyrodiniellum	0	0.33	0.07	0.1	89.28
	OTU_3107	Gonyaulacales	Ceratiaceae	Ceratium	0.12	0.24	0.07	0.1	89.38
	OTU_1417	Gonyaulacales	Ceratiaceae	Ceratium	0.46	0.08	0.07	0.1	89.48
	OTU_3070	Gonyaulacales	Ceratiaceae	Ceratium	0.46	0.03	0.07	0.1	89.58
	OTU_5590	Gonyaulacales	Ceratiaceae	Ceratium	0.23	0	0.07	0.1	89.67
	OTU_4428	Gonyaulacales	Ceratiaceae	Ceratium	0.23	0	0.07	0.1	89.77
	OTU_4436	Gonyaulacales	Ceratiaceae	Ceratium	0.23	0	0.07	0.1	89.86
	OTU_2318	Gonyaulacales	Ceratiaceae	Ceratium	0.23	0	0.07	0.1	89.96
	OTU_10347	Peridiniales	Thoracosphaeraceae	Thoracosphaeraceae_X	0.69	0.07	0.07	0.1	90.05

## Sheet: Tables S4
Table S4 Results of the similarity percentage (SIMPER) analysis within each group
	OTUs	Order	Family	Genus	Average Abundance	Average Similarity	Contribution %	Cumulitive Contribution %
Group I Average similarity: 12.39	OTU_6	Gonyaulacales	Ceratiaceae	Ceratium	397.7	6.78	54.74	54.74
	OTU_7	Peridiniales	Kryptoperidiniaceae	Unruhdinium	82.71	1.16	9.34	64.08
	OTU_115	Peridiniales	Thoracosphaeraceae	Thoracosphaeraceae_X	2.83	0.85	6.84	70.92
	OTU_1053	Peridiniales	Thoracosphaeraceae	Apocalathium	2.23	0.79	6.39	77.31
	OTU_228	Prorocentrales	Prorocentraceae	Prorocentrum	7.92	0.44	3.56	80.88
	OTU_311	Peridiniales	Peridiniopsidaceae	Parvodinium	3.76	0.23	1.88	82.75
	OTU_2089	Peridiniales	Thoracosphaeraceae	Thoracosphaeraceae_X	0.8	0.15	1.24	83.99
	OTU_721	Dinophyceae_X	Dinophyceae_XX	Dinophyceae_XXX	1.6	0.15	1.2	85.19
	OTU_447	Dino-Group-I	Dino-Group-I-Clade-4	Dino-Group-I-Clade-4_X	2.82	0.14	1.09	86.28
	OTU_375	Peridiniales	Peridiniaceae	Peridinium	3.79	0.13	1.08	87.36
	OTU_508	Gonyaulacales	Ceratiaceae	Ceratium	3.43	0.12	0.96	88.32
	OTU_424	Dinophyceae_X	Dinophyceae_XX	Dinophyceae_XXX	1.14	0.1	0.78	89.09
	OTU_3287	Gymnodiniales	Gymnodiniaceae	Gymnodinium	0.48	0.08	0.65	89.74
	OTU_460	Gonyaulacales	Ceratiaceae	Ceratium	4.21	0.07	0.59	90.33
	OTU_886	Gonyaulacales	Ceratiaceae	Ceratium	2.6	0.8	1.88	90.88
Group II Average similarity: 21.44	OTU_6	Gonyaulacales	Ceratiaceae	Ceratium	118.3	17.89	83.44	83.44
	OTU_115	Peridiniales	Thoracosphaeraceae	Thoracosphaeraceae_X	80.77	0.6	2.8	86.24
	OTU_7	Peridiniales	Kryptoperidiniaceae	Unruhdinium	14.26	0.44	2.04	88.28
	OTU_328	Peridiniales	Kryptoperidiniaceae	Durinskia	20.03	0.39	1.84	90.12
Group III Average similarity: 29.15	OTU_6	Gonyaulacales	Ceratiaceae	Ceratium	81.71	33.68	76	76
	OTU_7	Peridiniales	Kryptoperidiniaceae	Unruhdinium	15.06	2.71	6.11	82.11
	OTU_115	Peridiniales	Thoracosphaeraceae	Thoracosphaeraceae_X	8.03	1.15	2.6	84.7
	OTU_319	Peridiniales	Diplopsalidaceae	Diplopsalis	5.52	0.75	1.69	86.39
	OTU_146	Peridiniales	Peridiniopsidaceae	Parvodinium	5.97	0.59	1.33	87.72
	OTU_447	Dino-Group-I	Dino-Group-I-Clade-4	Dino-Group-I-Clade-4_X	1.63	0.45	1.02	88.74
	OTU_448	Dino-Group-I	Dino-Group-I-Clade-4	Dino-Group-I-Clade-4_X	1.29	0.41	0.93	89.67
	OTU_424	Dinophyceae_X	Dinophyceae_XX	Dinophyceae_XXX	1.87	0.35	0.8	90.47
